# Supplementary material for: Composition of terrestrial mammal assemblages and their habitat use in unflooded and flooded blackwater forests in the Central Amazon
Source: PeerJ. 2022 Dec 12;10:e14374. doi: 10.7717/peerj.14374 (PMC9753760; doi:10.7717/peerj.14374)
Supplement: Supplemental Information 7 — Data matrix of independent detections of 30 terrestrial mammal’s species recorded on the unflooded (terra firme) and seasonally flooded (igapó) forests in the Cuieiras River basin, Central Amazon, Brazil. [file peerj-10-14374-s007.xlsx]

## Sheet: MatrixIndependentRecords
Station	Florest_type	Year	Effort	Cuniculus.paca	Dasyprocta.leporina	Dasypus.spp.	Dicotyles.tajacu	Didelphis.marsupialis	Eira.barbara	Guerlinguetus.aestuans	Hydrochoerus.hydrochaeris	Leopardus.pardalis	Leopardus.wiedii	Marmosa.spp.	Mazama.americana	Mazama.nemorivaga	Metachirus.nudicaudatus	Myoprocta.acouchy	Myrmecophaga.tridactyla	Nasua.nasua	Oecomys.spp.	Panthera.onca	Philander.opossum	Priodontes.maximus	Proechimys.spp.	Pteronura.brasiliensis	Puma.concolor	Puma.yagouaroundi	Tamandua.tetradactyla	Tapirus.terrestris	Tayassu.pecari	Saimiri.sciureus	Sapajus.apella
TF-1-01	Terra_Firme	2018	106	8	6	3	0	24	0	0	0	0	0	0	0	1	7	97	2	1	6	0	3	0	9	0	0	0	0	0	0	0	0
TF-1-02	Terra_Firme	2018	106	3	2	0	0	12	0	0	0	0	0	16	0	1	29	19	0	0	4	1	5	0	16	0	0	0	0	1	0	0	0
TF-1-03	Terra_Firme	2018	106	5	8	3	0	1	3	0	0	0	0	1	0	1	15	21	0	1	0	1	2	0	9	0	0	0	0	0	0	0	0
TF-1-04	Terra_Firme	2018	106	2	78	3	0	7	0	23	0	0	0	7	1	0	27	58	0	0	0	0	6	0	51	0	0	0	0	0	0	0	0
TF-1-05	Terra_Firme	2018	106	0	1	0	0	1	0	0	0	1	0	0	0	1	4	37	0	0	0	0	0	0	8	0	0	0	0	0	0	0	0
TF-1-06	Terra_Firme	2018	16	0	1	1	0	0	0	0	0	0	0	0	0	0	2	1	0	0	0	0	0	0	0	0	0	0	0	0	0	0	0
TF-1-07	Terra_Firme	2018	73	5	2	0	0	13	0	0	0	0	1	0	1	1	10	12	0	0	0	1	1	0	3	0	0	0	0	0	0	0	0
TF-1-08	Terra_Firme	2018	73	0	1	14	0	0	0	0	0	0	1	0	0	0	2	5	0	0	0	0	0	0	1	0	0	1	0	1	0	0	0
TF-1-09	Terra_Firme	2018	73	4	1	6	0	0	0	0	0	0	0	0	2	4	2	22	1	0	0	0	0	0	0	0	0	0	0	1	0	0	0
TF-1-10	Terra_Firme	2018	73	9	3	2	2	21	1	0	0	1	0	0	0	1	7	38	1	0	0	0	0	0	0	0	0	0	0	1	0	0	0
TF-1-11	Terra_Firme	2018	103	2	3	2	0	2	1	0	0	1	0	0	0	1	15	0	0	1	0	0	13	0	3	0	0	0	0	0	1	0	0
TF-1-12	Terra_Firme	2018	103	2	5	13	4	8	0	0	0	1	0	0	3	1	28	31	1	0	0	0	0	0	1	0	0	0	0	0	0	0	0
TF-1-13	Terra_Firme	2018	94	0	0	7	2	5	0	0	0	0	0	0	2	9	35	18	1	0	0	0	0	0	2	0	0	0	0	0	0	0	0
TF-1-14	Terra_Firme	2018	94	3	1	1	3	2	0	0	0	0	1	0	1	1	30	7	2	0	0	0	0	0	8	0	0	0	0	0	0	0	0
TF-1-15	Terra_Firme	2018	94	3	2	2	5	29	0	0	0	0	0	0	1	1	52	13	0	0	0	0	0	0	0	0	0	0	0	0	0	0	0
TF-1-16	Terra_Firme	2018	104	1	7	1	0	1	1	0	0	0	0	0	0	0	1	0	0	0	0	0	4	0	5	0	0	0	0	0	0	0	0
TF-1-17	Terra_Firme	2018	103	2	6	3	0	18	3	6	0	0	0	0	3	2	9	23	0	1	0	0	48	0	5	0	0	0	0	0	0	0	0
TF-1-18	Terra_Firme	2018	106	3	28	3	17	3	0	0	0	0	0	0	2	3	17	26	0	1	0	0	1	0	14	0	0	0	0	0	0	0	0
TF-1-19	Terra_Firme	2018	106	28	3	4	0	7	0	0	0	0	0	0	1	3	13	48	2	1	0	0	37	0	0	0	0	0	0	0	0	0	0
TF-1-20	Terra_Firme	2018	103	5	1	12	0	4	0	0	0	1	0	0	0	0	31	102	1	0	0	0	3	0	10	0	0	0	0	1	0	0	0
TF-1-21	Terra_Firme	2018	104	0	9	0	0	4	0	0	0	1	0	0	2	1	69	53	0	0	0	0	0	0	25	0	0	1	0	0	0	0	0
TF-1-22	Terra_Firme	2018	104	8	3	9	1	17	1	3	0	0	1	0	0	7	11	10	1	3	0	0	0	0	0	0	0	2	0	0	0	0	0
TF-1-23	Terra_Firme	2018	101	0	9	1	3	13	0	0	0	0	0	0	0	1	69	20	0	0	0	0	1	0	3	0	0	2	0	0	0	0	0
TF-1-24	Terra_Firme	2018	88	0	0	1	0	3	0	0	0	0	0	2	0	0	88	24	0	0	0	0	1	0	9	0	0	0	0	1	0	0	0
TF-1-25	Terra_Firme	2018	51	1	10	4	3	4	0	0	0	1	0	0	0	1	15	33	0	0	0	0	0	0	1	0	0	0	0	0	0	0	0
TF-1-26	Terra_Firme	2018	71	1	5	1	1	5	1	0	0	1	0	0	0	0	0	3	0	0	0	0	0	0	0	0	1	0	0	0	0	0	0
TF-1-27	Terra_Firme	2018	71	0	0	3	1	0	0	3	0	0	0	0	0	2	3	9	0	0	0	1	0	0	1	0	0	0	0	0	0	0	0
TF-1-28	Terra_Firme	2018	71	1	2	4	0	1	0	0	0	1	0	1	1	1	19	16	0	0	0	0	0	0	3	0	0	0	0	0	0	0	0
TF-1-29	Terra_Firme	2018	71	1	1	2	0	1	0	0	0	0	1	3	1	0	28	16	0	0	0	0	1	1	1	0	0	0	0	0	0	0	0
TF-1-30	Terra_Firme	2018	71	2	0	6	0	0	0	2	0	0	0	0	0	0	0	0	0	0	0	0	2	1	0	0	0	0	0	1	0	0	0
TF-1-31	Terra_Firme	2018	102	5	6	1	0	7	0	0	0	2	0	0	2	2	15	2	0	1	0	0	0	0	3	0	0	0	0	0	0	0	0
TF-1-32	Terra_Firme	2018	102	3	4	7	1	7	0	1	0	1	0	0	1	3	10	64	0	0	0	0	0	0	10	0	0	0	0	0	0	0	0
TF-1-33	Terra_Firme	2018	104	13	0	8	2	22	0	0	0	0	0	0	0	10	38	21	0	0	0	0	3	0	24	0	0	0	0	0	0	0	0
TF-1-34	Terra_Firme	2018	104	2	6	2	1	8	0	0	0	2	0	0	0	3	39	31	0	0	0	0	0	1	4	0	0	0	0	2	0	0	0
TF-1-35	Terra_Firme	2018	104	2	0	0	0	0	0	1	0	1	0	0	0	1	2	4	0	0	0	0	0	0	2	0	0	0	0	1	0	0	0
TF-1-36	Terra_Firme	2018	105	0	38	12	0	71	0	0	0	0	0	0	0	5	4	9	1	0	5	0	17	0	11	0	0	0	0	0	0	0	0
TF-1-37	Terra_Firme	2018	105	3	2	5	1	6	0	0	0	0	0	0	2	4	39	9	0	0	0	0	1	0	0	0	2	0	0	1	0	0	0
TF-1-38	Terra_Firme	2018	105	47	0	19	3	23	0	0	0	0	0	0	0	0	21	60	0	2	0	0	0	0	4	0	1	0	0	0	0	0	0
TF-1-39	Terra_Firme	2018	0	0	0	0	0	0	0	0	0	0	0	0	0	0	0	0	0	0	0	0	0	0	0	0	0	0	0	0	0	0	0
TF-1-40	Terra_Firme	2018	105	0	0	0	1	3	0	0	0	0	0	0	0	22	1	18	0	0	0	0	0	0	6	0	0	0	0	1	0	0	0
TF-2-01	Terra_Firme	2019	62	4	16	3	0	3	0	0	0	0	1	0	0	1	11	15	0	0	0	1	1	0	0	0	0	0	1	0	0	0	0
TF-2-02	Terra_Firme	2019	62	9	1	4	0	3	0	0	0	0	0	0	0	0	15	9	0	1	0	0	1	0	1	0	0	0	0	0	0	0	0
TF-2-03	Terra_Firme	2019	62	5	7	3	1	2	0	0	0	0	0	0	0	0	14	22	0	0	0	0	13	0	10	0	0	0	0	0	0	0	0
TF-2-04	Terra_Firme	2019	62	0	8	2	0	12	0	1	0	0	0	0	0	0	13	31	0	0	0	0	15	0	6	0	0	0	0	0	0	0	0
TF-2-05	Terra_Firme	2019	62	0	3	2	3	3	0	0	0	0	0	0	0	1	4	21	1	0	0	0	2	0	4	0	1	0	0	0	0	0	0
TF-2-06	Terra_Firme	2019	62	1	11	2	1	9	1	0	0	1	0	0	0	0	8	8	0	1	0	1	0	0	0	0	0	0	0	0	0	0	0
TF-2-07	Terra_Firme	2019	62	1	7	1	3	5	0	0	0	0	0	0	0	1	3	7	0	0	0	2	0	0	3	0	0	0	0	0	0	0	0
TF-2-08	Terra_Firme	2019	62	2	2	3	1	4	1	0	0	0	0	0	0	0	21	8	0	0	0	0	0	0	1	0	1	0	0	0	0	0	0
TF-2-09	Terra_Firme	2019	62	0	2	8	0	1	0	0	0	0	0	0	2	0	3	6	0	0	0	0	0	0	0	0	0	0	0	0	0	0	0
TF-2-10	Terra_Firme	2019	62	3	9	3	0	7	0	0	0	2	0	0	0	0	10	4	0	0	0	0	0	0	0	0	0	0	0	0	0	0	0
TF-2-11	Terra_Firme	2019	62	0	4	0	1	5	0	0	0	0	0	0	0	0	20	5	0	0	0	1	1	0	4	0	0	1	0	0	0	0	0
TF-2-12	Terra_Firme	2019	62	0	0	0	0	5	0	0	0	0	1	0	0	0	3	2	0	0	0	1	0	0	0	0	0	0	0	0	0	0	0
TF-2-13	Terra_Firme	2019	62	0	5	1	0	3	0	0	0	0	0	0	0	0	16	16	0	0	0	1	11	0	0	0	0	0	0	0	0	0	0
TF-2-14	Terra_Firme	2019	62	0	1	6	1	30	0	0	0	0	0	0	1	0	28	14	0	0	0	0	0	0	0	0	1	0	0	0	0	0	0
TF-2-15	Terra_Firme	2019	62	0	6	6	0	12	1	0	0	1	0	0	0	0	46	21	0	0	0	0	0	0	3	0	0	0	0	0	0	0	0
TF-2-16	Terra_Firme	2019	62	0	29	2	1	4	1	0	0	0	0	0	0	0	2	1	0	0	0	0	0	0	0	0	0	0	0	0	0	0	0
TF-2-17	Terra_Firme	2019	65	1	1	0	0	8	0	1	0	0	0	0	0	0	15	22	0	1	0	0	9	0	6	0	0	0	0	2	0	0	0
TF-2-18	Terra_Firme	2019	63	0	0	0	0	13	0	0	0	1	0	0	0	1	41	32	0	0	0	0	2	0	3	0	0	0	0	0	0	0	0
TF-2-19	Terra_Firme	2019	63	9	8	4	0	5	1	0	0	0	0	0	0	2	2	12	0	0	0	0	4	0	0	0	0	0	0	0	0	0	0
TF-2-20	Terra_Firme	2019	61	5	0	4	0	16	0	0	0	0	0	0	0	0	3	20	0	1	0	0	1	0	3	0	0	0	0	0	0	0	0
TF-2-21	Terra_Firme	2019	62	0	4	2	0	10	0	0	0	0	0	0	0	0	7	33	0	1	0	0	0	0	4	0	0	1	0	0	0	0	0
TF-2-22	Terra_Firme	2019	63	2	16	3	0	9	0	0	0	0	0	0	0	0	11	7	1	0	0	0	1	0	6	0	1	0	0	0	0	0	0
TF-2-23	Terra_Firme	2019	62	1	5	4	0	3	1	0	0	0	0	0	0	0	5	25	0	0	0	0	0	0	3	0	0	0	0	0	0	0	0
TF-2-24	Terra_Firme	2019	62	2	2	3	3	11	0	0	0	0	0	0	2	2	15	58	0	0	0	1	4	0	2	0	0	0	0	0	0	0	0
TF-2-25	Terra_Firme	2019	58	0	2	11	0	3	1	0	0	1	0	0	0	0	45	20	0	1	0	0	4	0	12	0	0	0	0	0	0	0	0
TF-2-26	Terra_Firme	2019	62	1	3	0	0	17	0	0	0	0	0	0	0	0	29	22	0	0	0	1	0	0	3	0	0	0	0	0	0	0	0
TF-2-27	Terra_Firme	2019	62	0	0	3	0	16	1	0	0	0	0	0	0	0	17	18	0	0	0	1	1	0	11	0	0	0	0	2	0	0	0
TF-2-28	Terra_Firme	2019	62	1	2	2	1	1	0	0	0	1	0	0	0	2	8	28	0	0	0	0	0	0	7	0	0	0	0	1	0	0	0
TF-2-29	Terra_Firme	2019	62	0	8	1	0	1	0	0	0	0	0	0	0	0	27	44	0	0	0	0	1	0	4	0	0	0	0	0	0	0	0
TF-2-30	Terra_Firme	2019	62	8	0	1	0	0	0	0	0	0	0	0	0	0	0	15	0	0	0	0	3	0	1	0	0	0	0	0	0	0	0
TF-2-31	Terra_Firme	2019	62	0	5	6	1	24	0	0	0	1	0	0	1	2	26	32	0	0	0	0	9	0	3	0	0	0	0	0	0	0	0
TF-2-32	Terra_Firme	2019	62	3	0	1	2	5	0	0	0	0	0	0	1	0	8	30	0	1	0	0	3	0	1	0	0	0	0	0	0	0	0
TF-2-33	Terra_Firme	2019	62	2	1	4	1	16	0	0	0	2	0	0	0	0	18	10	0	2	0	1	9	0	4	0	1	0	0	0	0	0	0
TF-2-34	Terra_Firme	2019	62	1	0	0	0	6	0	0	0	0	0	0	0	0	18	13	0	0	0	0	0	0	8	0	0	0	0	0	0	0	0
TF-2-35	Terra_Firme	2019	62	26	7	1	2	3	0	0	0	0	0	0	0	0	0	1	0	0	0	0	0	0	7	0	0	0	1	0	0	0	0
TF-2-36	Terra_Firme	2019	62	2	19	2	0	23	0	0	0	0	0	0	0	0	1	13	0	1	0	0	25	0	3	0	1	0	0	0	0	0	0
TF-2-37	Terra_Firme	2019	62	0	7	3	1	6	0	0	0	0	0	0	0	1	53	6	0	0	0	0	0	0	4	0	0	0	0	0	0	0	0
TF-2-38	Terra_Firme	2019	63	9	4	0	1	8	0	0	0	0	0	0	0	0	34	33	0	0	0	0	13	0	2	0	0	0	0	0	0	0	0
TF-2-39	Terra_Firme	2019	6	0	3	0	0	4	0	0	0	1	0	0	0	0	1	8	0	0	0	0	0	0	0	0	0	0	0	0	0	0	0
TF-2-40	Terra_Firme	2019	62	1	0	0	0	4	0	0	0	0	0	0	0	0	0	34	1	0	0	0	0	0	1	0	1	0	0	0	0	0	0
IGA-1-01	Igapo	2018	78	0	0	0	0	0	0	0	0	1	0	0	0	1	1	0	0	0	0	0	0	0	0	0	0	0	0	0	0	0	0
IGA-1-02	Igapo	2018	60	6	9	1	0	0	0	0	0	1	0	0	0	1	0	0	0	0	0	0	0	0	0	0	0	0	0	0	0	0	0
IGA-1-03	Igapo	2018	54	0	1	0	0	0	0	0	0	0	0	0	0	0	0	0	0	0	0	0	0	0	0	0	0	0	0	0	0	0	0
IGA-1-04	Igapo	2018	59	2	0	0	0	0	0	0	0	0	0	0	0	0	0	0	0	0	0	0	0	0	0	0	0	0	0	0	0	0	0
IGA-1-05	Igapo	2018	53	0	9	0	0	0	0	0	0	0	0	0	0	0	0	0	0	0	0	0	0	0	0	0	0	0	0	1	0	0	0
IGA-1-06	Igapo	2018	53	0	0	0	0	0	0	0	0	0	0	0	0	0	0	0	0	0	0	0	0	0	0	0	0	0	0	0	0	0	0
IGA-1-07	Igapo	2018	61	0	1	0	0	0	0	0	0	0	0	0	0	0	0	0	0	0	0	0	4	0	1	0	0	0	0	0	0	0	0
IGA-1-08	Igapo	2018	78	0	0	0	0	0	0	0	0	0	1	0	0	0	0	0	0	0	0	0	0	0	0	0	0	0	0	0	0	0	0
IGA-1-09	Igapo	2018	53	0	0	0	0	1	0	0	0	0	2	0	0	0	0	0	0	0	0	0	0	0	1	0	0	0	0	0	0	0	0
IGA-1-10	Igapo	2018	51	0	3	0	4	4	0	0	0	0	0	0	2	0	0	0	0	0	0	0	0	0	0	0	0	0	0	0	0	0	0
IGA-1-11	Igapo	2018	46	4	5	0	0	0	0	0	0	0	0	0	0	0	0	0	0	0	0	0	0	0	0	0	0	0	0	0	0	0	0
IGA-1-12	Igapo	2018	46	0	2	0	0	16	0	0	0	0	0	0	0	3	12	0	0	0	0	0	14	0	2	0	0	0	0	0	0	0	0
IGA-1-13	Igapo	2018	71	0	7	0	0	0	0	0	0	0	1	0	0	0	0	0	0	0	0	0	0	0	0	0	1	0	0	0	0	0	0
IGA-1-14	Igapo	2018	74	0	0	0	0	0	0	0	0	0	0	0	0	0	0	3	0	3	0	0	0	0	2	0	0	0	0	0	0	0	0
IGA-1-15	Igapo	2018	48	0	0	0	0	0	0	0	0	0	1	0	0	0	0	0	0	0	0	0	0	0	0	0	0	0	0	0	0	0	0
IGA-1-16	Igapo	2018	72	1	7	0	0	4	0	0	0	0	0	0	0	0	0	0	0	0	0	1	10	0	9	0	0	0	0	0	0	0	0
IGA-1-17	Igapo	2018	48	0	0	0	0	1	0	0	0	0	0	0	0	0	0	0	0	0	0	0	0	0	3	0	0	0	0	1	0	0	0
IGA-1-18	Igapo	2018	48	0	0	0	0	0	0	0	0	0	0	0	0	0	0	0	0	0	0	0	0	0	2	0	0	0	0	0	0	0	0
IGA-1-19	Igapo	2018	48	0	1	0	0	1	0	0	0	0	0	0	0	0	1	0	0	0	0	0	0	0	0	0	0	0	0	0	0	0	0
IGA-1-20	Igapo	2018	74	1	7	0	0	0	0	0	0	0	0	0	4	0	0	5	0	0	0	0	4	0	20	0	0	0	0	0	0	0	0
IGA-1-21	Igapo	2018	49	0	1	0	0	0	0	0	0	0	0	0	0	0	0	0	0	0	0	0	1	0	1	0	0	0	0	0	0	0	0
IGA-1-22	Igapo	2018	49	0	1	0	0	0	0	0	0	0	0	0	0	0	0	0	0	0	0	0	1	0	0	0	0	0	0	0	0	0	0
IGA-1-23	Igapo	2018	72	2	6	0	0	4	0	0	0	0	0	0	0	0	0	0	0	0	0	0	1	0	1	0	0	0	0	0	0	0	0
IGA-1-24	Igapo	2018	73	0	3	1	0	6	0	0	0	1	0	0	0	0	0	0	0	0	0	0	2	0	2	0	0	0	0	0	0	0	0
IGA-1-25	Igapo	2018	6	0	1	0	0	2	0	0	0	0	0	0	0	0	0	0	0	0	0	0	0	0	0	0	0	0	0	0	0	0	0
IGA-1-26	Igapo	2018	13	0	0	1	0	0	0	0	0	0	0	0	0	0	0	0	0	0	0	0	0	0	0	0	0	0	0	0	0	0	0
IGA-1-27	Igapo	2018	50	0	4	0	0	0	0	0	1	0	0	0	0	0	1	0	0	0	0	0	0	0	0	0	0	0	0	0	0	0	0
IGA-1-28	Igapo	2018	76	0	29	0	0	6	0	0	0	0	0	0	0	0	1	0	0	0	0	0	1	0	3	0	0	0	0	0	0	0	0
IGA-1-29	Igapo	2018	74	24	32	0	0	5	0	0	0	1	0	0	0	3	1	13	0	4	0	0	1	0	0	0	0	0	0	0	0	0	0
IGA-1-30	Igapo	2018	76	0	0	0	0	0	0	0	0	0	0	0	0	1	0	0	0	0	0	0	0	0	0	0	0	1	0	0	0	0	0
IGA-1-31	Igapo	2018	74	1	13	0	0	0	1	0	0	2	0	0	0	1	14	4	2	1	0	0	3	0	1	0	0	0	0	0	0	1	1
IGA-1-32	Igapo	2018	74	0	4	0	0	0	2	0	0	0	0	0	0	1	0	0	0	0	0	0	7	0	3	0	0	0	0	0	0	0	0
IGA-1-33	Igapo	2018	74	2	10	1	0	2	0	0	0	0	0	0	0	0	0	17	0	0	0	0	4	0	0	0	0	0	0	0	0	0	0
IGA-1-34	Igapo	2018	74	0	7	0	0	0	0	0	0	0	0	0	2	0	2	2	0	0	0	0	0	0	0	0	0	0	0	0	0	0	0
IGA-1-35	Igapo	2018	75	1	18	2	0	0	0	0	0	0	0	0	0	1	0	0	0	0	0	0	15	0	1	0	0	0	0	0	0	0	0
IGA-1-36	Igapo	2018	75	0	12	1	1	1	0	0	0	0	0	0	0	0	7	0	0	0	0	0	0	0	3	0	0	0	0	0	0	0	0
IGA-1-37	Igapo	2018	75	0	1	0	0	4	0	0	0	0	0	0	4	0	0	0	0	0	0	0	0	0	1	0	0	0	0	0	0	0	0
IGA-1-38	Igapo	2018	75	1	2	0	0	0	0	0	0	0	0	0	0	0	1	35	0	0	0	0	9	0	4	0	0	0	0	0	0	0	0
IGA-1-39	Igapo	2018	0	0	0	0	0	0	0	0	0	0	0	0	0	0	0	0	0	0	0	0	0	0	0	0	0	0	0	0	0	0	0
IGA-1-40	Igapo	2018	75	0	29	0	0	0	0	0	0	0	0	0	0	2	1	0	0	0	0	0	12	0	11	0	0	0	0	0	0	0	0
IGA-2-01	Igapo	2019	61	1	0	0	4	0	0	0	0	0	0	0	0	0	0	0	0	0	0	0	0	0	0	0	0	0	0	0	0	0	0
IGA-2-02	Igapo	2019	61	1	19	0	0	0	0	0	0	0	0	0	0	0	0	0	0	0	0	0	0	0	0	0	0	0	0	1	0	0	0
IGA-2-03	Igapo	2019	61	0	2	0	0	0	1	0	0	0	0	0	0	0	1	0	0	0	0	0	0	0	0	0	0	0	0	0	0	0	0
IGA-2-04	Igapo	2019	61	10	0	0	1	0	1	0	0	0	0	0	0	0	0	0	0	0	0	0	0	0	0	0	0	0	0	0	0	0	0
IGA-2-05	Igapo	2019	61	1	4	0	0	0	0	0	0	0	1	0	0	0	0	0	0	0	0	0	0	0	0	0	0	0	0	1	0	0	0
IGA-2-06	Igapo	2019	61	0	0	0	0	0	0	0	0	0	0	0	0	0	0	0	0	0	0	0	0	0	0	0	1	0	0	1	0	0	0
IGA-2-07	Igapo	2019	60	0	1	0	0	0	1	0	0	1	1	0	0	0	0	0	0	0	0	0	1	0	0	0	0	0	0	0	0	0	0
IGA-2-08	Igapo	2019	60	0	0	0	0	0	0	0	0	0	0	0	0	0	0	0	0	0	0	0	0	0	0	0	0	0	0	0	0	0	0
IGA-2-09	Igapo	2019	60	0	0	0	0	0	0	0	0	0	0	0	0	0	0	0	0	0	0	0	0	0	0	0	0	0	0	0	0	0	0
IGA-2-10	Igapo	2019	60	0	9	0	8	5	0	0	0	1	0	0	0	0	0	0	0	0	0	0	0	0	0	0	0	0	0	0	0	0	0
IGA-2-11	Igapo	2019	60	0	9	0	0	0	0	0	0	0	1	0	0	0	0	0	0	0	0	0	0	0	0	0	0	0	0	0	0	0	0
IGA-2-12	Igapo	2019	61	9	37	0	0	2	0	0	0	2	0	0	0	2	0	0	0	0	0	0	2	0	1	0	0	0	0	1	0	0	0
IGA-2-13	Igapo	2019	61	0	1	0	2	0	0	0	0	0	0	0	0	0	0	6	1	0	0	0	0	0	0	0	0	0	0	0	0	0	0
IGA-2-14	Igapo	2019	61	0	2	0	1	0	2	0	0	0	0	0	0	0	0	1	0	0	0	1	0	0	0	0	0	0	0	0	0	0	0
IGA-2-15	Igapo	2019	61	0	0	0	0	0	0	0	0	0	0	0	0	0	0	0	0	0	0	0	0	0	0	0	0	0	0	0	0	0	0
IGA-2-16	Igapo	2019	61	0	6	0	3	10	0	0	0	0	0	0	0	0	0	0	0	0	0	0	0	0	0	0	0	0	0	1	0	0	0
IGA-2-17	Igapo	2019	60	0	4	0	4	0	0	0	0	0	0	0	0	0	0	0	0	0	0	0	0	0	0	0	0	0	0	0	0	0	0
IGA-2-18	Igapo	2019	58	0	0	0	0	0	0	0	0	0	0	0	0	0	0	0	0	0	0	0	0	0	0	0	0	0	0	0	0	0	0
IGA-2-19	Igapo	2019	58	0	2	0	0	8	1	0	0	0	0	0	0	0	0	0	0	0	0	0	0	0	0	6	0	0	0	0	0	0	0
IGA-2-20	Igapo	2019	58	0	5	0	6	1	0	0	0	0	0	0	0	0	0	0	0	0	0	0	0	0	0	0	1	0	0	0	0	0	0
IGA-2-21	Igapo	2019	58	0	0	0	0	0	0	0	0	0	0	0	0	0	0	0	0	0	0	0	0	0	1	0	0	0	0	0	0	0	0
IGA-2-22	Igapo	2019	58	0	0	0	0	0	0	0	0	0	0	0	0	0	0	0	0	0	0	0	0	0	0	0	0	0	0	0	0	0	0
IGA-2-23	Igapo	2019	33	0	5	0	0	1	0	0	0	0	0	0	0	0	0	0	0	0	0	0	1	0	0	0	0	0	0	0	0	0	0
IGA-2-24	Igapo	2019	58	0	26	0	0	12	0	0	0	0	0	0	1	1	0	0	0	0	0	0	0	0	0	0	0	0	0	0	0	0	0
IGA-2-25	Igapo	2019	58	0	1	0	0	3	11	0	0	0	0	0	0	2	0	12	0	3	0	0	0	0	0	0	0	0	0	0	0	0	0
IGA-2-26	Igapo	2019	58	0	21	0	0	20	0	0	0	1	0	0	0	0	0	0	0	0	0	0	1	0	0	0	0	0	0	0	0	0	0
IGA-2-27	Igapo	2019	56	0	2	0	0	0	0	0	0	0	0	0	0	0	0	0	0	0	0	0	0	0	0	0	0	0	0	0	0	0	0
IGA-2-28	Igapo	2019	58	4	15	0	0	6	0	0	0	0	0	0	0	0	0	0	0	0	3	0	0	0	0	0	0	1	0	0	0	0	0
IGA-2-29	Igapo	2019	58	2	32	0	0	17	0	0	0	0	0	0	2	1	0	1	0	1	0	0	0	0	10	0	0	0	0	0	0	0	1
IGA-2-30	Igapo	2019	58	0	0	0	0	2	0	0	0	0	0	0	0	0	0	0	0	0	0	0	0	0	0	0	0	0	0	0	0	0	0
IGA-2-31	Igapo	2019	58	0	23	0	0	0	0	0	0	1	0	0	0	0	0	5	0	1	0	0	2	0	2	0	0	0	1	0	0	0	0
IGA-2-32	Igapo	2019	58	2	5	0	1	8	0	0	0	0	1	0	0	0	0	0	0	0	0	1	0	0	2	0	0	0	1	0	0	0	0
IGA-2-33	Igapo	2019	59	0	10	0	0	0	0	0	0	0	0	0	0	0	0	1	0	0	0	0	0	0	3	0	0	1	0	0	0	0	1
IGA-2-34	Igapo	2019	59	1	5	0	0	3	0	0	0	1	0	0	0	0	0	5	0	0	0	0	0	0	0	0	0	0	0	0	0	0	0
IGA-2-35	Igapo	2019	59	0	16	0	0	0	0	0	0	0	2	0	0	0	0	0	0	0	0	0	0	0	0	0	0	0	0	0	0	0	0
IGA-2-36	Igapo	2019	59	0	5	0	0	9	0	0	0	0	0	0	4	0	0	0	0	0	0	0	0	0	0	0	0	0	0	0	0	0	0
IGA-2-37	Igapo	2019	59	3	17	0	2	2	0	0	0	0	0	0	0	1	0	0	0	0	0	0	0	0	0	0	0	0	0	0	0	0	1
IGA-2-38	Igapo	2019	59	0	1	0	0	2	0	0	0	0	0	0	1	3	0	0	0	0	0	0	1	0	1	0	0	0	0	0	0	0	0
IGA-2-39	Igapo	2019	59	1	8	0	0	1	0	0	0	0	0	0	0	0	0	0	0	0	0	0	0	0	0	0	0	0	0	0	0	0	1
IGA-2-40	Igapo	2019	59	7	19	0	3	0	0	0	0	0	1	0	0	0	0	0	0	0	0	0	0	0	0	0	0	0	0	0	0	0	0
