# Supplementary material for: Composition of terrestrial mammal assemblages and their habitat use in unflooded and flooded blackwater forests in the Central Amazon
Source: PeerJ. 2022 Dec 12;10:e14374. doi: 10.7717/peerj.14374 (PMC9753760; doi:10.7717/peerj.14374)
Supplement: Supplemental Information 8 — Abbreviations and description of the data fields in the matrix. [file peerj-10-14374-s008.xlsx]

## Sheet: MetadataMatrixIndependentRecord
Abreviation	Description
Station	Camera trap code; TF referesto terra firme and IGA refers to igapó forest
Florest_type	Habitat type that camera was deployed
Year	The sampling year
Effort	Number of days the camera has been working
