# Supplementary material for: Composition of terrestrial mammal assemblages and their habitat use in unflooded and flooded blackwater forests in the Central Amazon
Source: PeerJ. 2022 Dec 12;10:e14374. doi: 10.7717/peerj.14374 (PMC9753760; doi:10.7717/peerj.14374)
Supplement: Supplemental Information 9 — Spreadsheet of records of terrestrial mammals obtained from camera traps distributed across the terra firme and igapó forests on the Cuieiras River basin, Central Amazon. [file peerj-10-14374-s009.xlsx]

## Sheet: CameraTrapRawData
Station	Florest_type	Year	Effort	Setup_date	Retrieval_date	Date	Time	Class	Trophic_guild	Genus	Species	Genus_Species	Number_animals	Sex
IGA-1-01	Igapo	2018	78	2018-10-18	2019-01-04	2019-01-04	15:53:25	INSTALL	Retrieval	Retrieval	Retrieval	Pickup	1	undefined
IGA-1-01	Igapo	2018	78	2018-10-18	2019-01-04	2018-12-10	22:49:49	MAMMAL	Insectivore.Omnivore	Metachirus	nudicaudatus	Metachirus_nudicaudatus	1	undefined
IGA-1-01	Igapo	2018	78	2018-10-18	2019-01-04	2018-12-04	03:39:37	MAMMAL	Carnivore	Leopardus	pardalis	Leopardus_pardalis	1	undefined
IGA-1-01	Igapo	2018	78	2018-10-18	2019-01-04	2018-12-01	15:44:39	MAMMAL	Frugivore.Herbivore	Mazama	nemorivaga	Mazama_nemorivaga	1	undefined
IGA-1-01	Igapo	2018	78	2018-10-18	2019-01-04	2018-10-18	16:05:20	INSTALL	Setup	Setup	Setup	Setup	1	undefined
IGA-2-01	Igapo	2019	61	2019-10-15	2019-12-15	2019-10-30	14:13:38	MAMMAL	Frugivore.Herbivore	Dicotyles	tajacu	Dicotyles_tajacu	1	undefined
IGA-2-01	Igapo	2019	61	2019-10-15	2019-12-15	2019-10-17	19:57:03	MAMMAL	Frugivore.Herbivore	Cuniculus	paca	Cuniculus_paca	1	undefined
IGA-2-01	Igapo	2019	61	2019-10-15	2019-12-15	2019-10-17	19:33:35	MAMMAL	Frugivore.Herbivore	Dicotyles	tajacu	Dicotyles_tajacu	1	undefined
IGA-2-01	Igapo	2019	61	2019-10-15	2019-12-15	2019-12-15	12:07:56	INSTALL	Retrieval	Retrieval	Retrieval	Pickup	1	undefined
IGA-2-01	Igapo	2019	61	2019-10-15	2019-12-15	2019-12-14	05:49:17	MAMMAL	Frugivore.Herbivore	Dicotyles	tajacu	Dicotyles_tajacu	7	undefined
IGA-2-01	Igapo	2019	61	2019-10-15	2019-12-15	2019-10-15	08:32:14	INSTALL	Setup	Setup	Setup	Setup	1	undefined
IGA-2-01	Igapo	2019	61	2019-10-15	2019-12-15	2019-12-13	11:38:42	MAMMAL	Frugivore.Herbivore	Dicotyles	tajacu	Dicotyles_tajacu	3	undefined
IGA-1-02	Igapo	2018	60	2018-10-18	2018-12-17	2018-11-07	01:50:22	MAMMAL	Frugivore.Herbivore	Cuniculus	paca	Cuniculus_paca	1	undefined
IGA-1-02	Igapo	2018	60	2018-10-18	2018-12-17	2018-11-07	15:09:34	MAMMAL	Frugivore.Granivore	Dasyprocta	leporina	Dasyprocta_leporina	1	undefined
IGA-1-02	Igapo	2018	60	2018-10-18	2018-12-17	2018-11-07	04:46:38	MAMMAL	Frugivore.Herbivore	Mazama	nemorivaga	Mazama_nemorivaga	1	undefined
IGA-1-02	Igapo	2018	60	2018-10-18	2018-12-17	2018-12-05	01:49:23	MAMMAL	Frugivore.Herbivore	Cuniculus	paca	Cuniculus_paca	1	undefined
IGA-1-02	Igapo	2018	60	2018-10-18	2018-12-17	2018-11-04	22:59:24	MAMMAL	Insectivore.Omnivore	Dasypus	spp.	Dasypus_spp.	1	undefined
IGA-1-02	Igapo	2018	60	2018-10-18	2018-12-17	2018-12-03	22:47:22	MAMMAL	Carnivore	Leopardus	pardalis	Leopardus_pardalis	1	undefined
IGA-1-02	Igapo	2018	60	2018-10-18	2018-12-17	2018-11-03	11:04:57	MAMMAL	Frugivore.Granivore	Dasyprocta	leporina	Dasyprocta_leporina	1	undefined
IGA-1-02	Igapo	2018	60	2018-10-18	2018-12-17	2018-12-13	10:31:33	MAMMAL	Frugivore.Granivore	Dasyprocta	leporina	Dasyprocta_leporina	1	undefined
IGA-1-02	Igapo	2018	60	2018-10-18	2018-12-17	2018-11-01	00:39:16	MAMMAL	Frugivore.Herbivore	Cuniculus	paca	Cuniculus_paca	1	undefined
IGA-1-02	Igapo	2018	60	2018-10-18	2018-12-17	2018-12-15	01:58:32	MAMMAL	Frugivore.Herbivore	Cuniculus	paca	Cuniculus_paca	1	undefined
IGA-1-02	Igapo	2018	60	2018-10-18	2018-12-17	2018-12-15	16:50:40	MAMMAL	Frugivore.Granivore	Dasyprocta	leporina	Dasyprocta_leporina	1	undefined
IGA-1-02	Igapo	2018	60	2018-10-18	2018-12-17	2018-10-31	05:52:04	MAMMAL	Frugivore.Granivore	Dasyprocta	leporina	Dasyprocta_leporina	1	undefined
IGA-1-02	Igapo	2018	60	2018-10-18	2018-12-17	2018-11-29	23:39:55	MAMMAL	Frugivore.Herbivore	Cuniculus	paca	Cuniculus_paca	1	undefined
IGA-1-02	Igapo	2018	60	2018-10-18	2018-12-17	2018-10-18	15:11:38	INSTALL	Setup	Setup	Setup	Setup	1	undefined
IGA-1-02	Igapo	2018	60	2018-10-18	2018-12-17	2018-12-17	16:10:55	INSTALL	Retrieval	Retrieval	Retrieval	Pickup	1	undefined
IGA-1-02	Igapo	2018	60	2018-10-18	2018-12-17	2018-10-29	17:53:21	MAMMAL	Frugivore.Granivore	Dasyprocta	leporina	Dasyprocta_leporina	1	undefined
IGA-1-02	Igapo	2018	60	2018-10-18	2018-12-17	2018-11-18	04:01:46	MAMMAL	Frugivore.Herbivore	Cuniculus	paca	Cuniculus_paca	1	undefined
IGA-1-02	Igapo	2018	60	2018-10-18	2018-12-17	2018-11-26	06:28:25	MAMMAL	Frugivore.Granivore	Dasyprocta	leporina	Dasyprocta_leporina	1	undefined
IGA-1-02	Igapo	2018	60	2018-10-18	2018-12-17	2018-11-23	15:08:34	MAMMAL	Frugivore.Granivore	Dasyprocta	leporina	Dasyprocta_leporina	1	undefined
IGA-1-02	Igapo	2018	60	2018-10-18	2018-12-17	2018-11-23	17:01:43	MAMMAL	Frugivore.Granivore	Dasyprocta	leporina	Dasyprocta_leporina	1	undefined
IGA-2-02	Igapo	2019	61	2019-10-15	2019-12-15	2019-10-28	10:06:45	MAMMAL	Frugivore.Granivore	Dasyprocta	leporina	Dasyprocta_leporina	1	undefined
IGA-2-02	Igapo	2019	61	2019-10-15	2019-12-15	2019-10-31	07:52:57	MAMMAL	Frugivore.Granivore	Dasyprocta	leporina	Dasyprocta_leporina	1	undefined
IGA-2-02	Igapo	2019	61	2019-10-15	2019-12-15	2019-10-31	09:05:26	MAMMAL	Frugivore.Granivore	Dasyprocta	leporina	Dasyprocta_leporina	1	undefined
IGA-2-02	Igapo	2019	61	2019-10-15	2019-12-15	2019-11-24	15:57:44	MAMMAL	Frugivore.Granivore	Dasyprocta	leporina	Dasyprocta_leporina	1	undefined
IGA-2-02	Igapo	2019	61	2019-10-15	2019-12-15	2019-11-22	08:05:55	MAMMAL	Frugivore.Granivore	Dasyprocta	leporina	Dasyprocta_leporina	1	undefined
IGA-2-02	Igapo	2019	61	2019-10-15	2019-12-15	2019-10-23	17:39:39	MAMMAL	Frugivore.Granivore	Dasyprocta	leporina	Dasyprocta_leporina	1	undefined
IGA-2-02	Igapo	2019	61	2019-10-15	2019-12-15	2019-11-04	07:23:28	MAMMAL	Frugivore.Granivore	Dasyprocta	leporina	Dasyprocta_leporina	1	undefined
IGA-2-02	Igapo	2019	61	2019-10-15	2019-12-15	2019-10-21	05:31:32	MAMMAL	Frugivore.Granivore	Dasyprocta	leporina	Dasyprocta_leporina	1	undefined
IGA-2-02	Igapo	2019	61	2019-10-15	2019-12-15	2019-11-07	16:41:34	MAMMAL	Frugivore.Granivore	Dasyprocta	leporina	Dasyprocta_leporina	1	undefined
IGA-2-02	Igapo	2019	61	2019-10-15	2019-12-15	2019-11-17	17:07:01	MAMMAL	Frugivore.Granivore	Dasyprocta	leporina	Dasyprocta_leporina	1	undefined
IGA-2-02	Igapo	2019	61	2019-10-15	2019-12-15	2019-10-17	09:29:18	MAMMAL	Frugivore.Granivore	Dasyprocta	leporina	Dasyprocta_leporina	1	undefined
IGA-2-02	Igapo	2019	61	2019-10-15	2019-12-15	2019-10-17	13:18:56	MAMMAL	Frugivore.Granivore	Dasyprocta	leporina	Dasyprocta_leporina	2	undefined
IGA-2-02	Igapo	2019	61	2019-10-15	2019-12-15	2019-12-15	11:45:35	INSTALL	Retrieval	Retrieval	Retrieval	Pickup	1	undefined
IGA-2-02	Igapo	2019	61	2019-10-15	2019-12-15	2019-11-09	08:19:48	MAMMAL	Frugivore.Granivore	Dasyprocta	leporina	Dasyprocta_leporina	1	undefined
IGA-2-02	Igapo	2019	61	2019-10-15	2019-12-15	2019-11-15	23:12:32	MAMMAL	Frugivore.Herbivore	Tapirus	terrestris	Tapirus_terrestris	1	Male
IGA-2-02	Igapo	2019	61	2019-10-15	2019-12-15	2019-12-09	05:48:05	MAMMAL	Frugivore.Granivore	Dasyprocta	leporina	Dasyprocta_leporina	1	undefined
IGA-2-02	Igapo	2019	61	2019-10-15	2019-12-15	2019-10-16	20:41:06	MAMMAL	Frugivore.Herbivore	Cuniculus	paca	Cuniculus_paca	1	undefined
IGA-2-02	Igapo	2019	61	2019-10-15	2019-12-15	2019-10-16	10:00:23	MAMMAL	Frugivore.Granivore	Dasyprocta	leporina	Dasyprocta_leporina	1	undefined
IGA-2-02	Igapo	2019	61	2019-10-15	2019-12-15	2019-10-15	15:19:37	MAMMAL	Frugivore.Granivore	Dasyprocta	leporina	Dasyprocta_leporina	1	undefined
IGA-2-02	Igapo	2019	61	2019-10-15	2019-12-15	2019-10-15	07:46:26	INSTALL	Setup	Setup	Setup	Setup	1	undefined
IGA-2-02	Igapo	2019	61	2019-10-15	2019-12-15	2019-11-11	07:39:44	MAMMAL	Frugivore.Granivore	Dasyprocta	leporina	Dasyprocta_leporina	1	undefined
IGA-2-02	Igapo	2019	61	2019-10-15	2019-12-15	2019-11-13	15:46:55	MAMMAL	Frugivore.Granivore	Dasyprocta	leporina	Dasyprocta_leporina	1	undefined
IGA-2-02	Igapo	2019	61	2019-10-15	2019-12-15	2019-11-12	13:35:05	MAMMAL	Frugivore.Granivore	Dasyprocta	leporina	Dasyprocta_leporina	1	undefined
IGA-1-03	Igapo	2018	54	2018-10-18	2018-12-11	2018-12-06	11:53:28	MAMMAL	Frugivore.Granivore	Dasyprocta	leporina	Dasyprocta_leporina	1	undefined
IGA-1-03	Igapo	2018	54	2018-10-18	2018-12-11	2018-12-11	14:14:43	INSTALL	Retrieval	Retrieval	Retrieval	Pickup	1	undefined
IGA-1-03	Igapo	2018	54	2018-10-18	2018-12-11	2018-10-18	16:49:50	INSTALL	Setup	Setup	Setup	Setup	1	undefined
IGA-2-03	Igapo	2019	61	2019-10-15	2019-12-15	2019-11-27	12:45:26	MAMMAL	Frugivore.Granivore	Dasyprocta	leporina	Dasyprocta_leporina	1	undefined
IGA-2-03	Igapo	2019	61	2019-10-15	2019-12-15	2019-10-31	23:16:16	MAMMAL	Insectivore.Omnivore	Metachirus	nudicaudatus	Metachirus_nudicaudatus	1	undefined
IGA-2-03	Igapo	2019	61	2019-10-15	2019-12-15	2019-12-06	08:59:29	MAMMAL	Frugivore.Omnivore	Eira	barbara	Eira_barbara	1	undefined
IGA-2-03	Igapo	2019	61	2019-10-15	2019-12-15	2019-12-15	11:25:24	INSTALL	Retrieval	Retrieval	Retrieval	Pickup	1	undefined
IGA-2-03	Igapo	2019	61	2019-10-15	2019-12-15	2019-11-09	09:55:05	MAMMAL	Frugivore.Granivore	Dasyprocta	leporina	Dasyprocta_leporina	1	undefined
IGA-2-03	Igapo	2019	61	2019-10-15	2019-12-15	2019-10-15	09:27:59	INSTALL	Setup	Setup	Setup	Setup	1	undefined
IGA-1-04	Igapo	2018	59	2018-10-18	2018-12-16	2018-12-09	00:19:03	MAMMAL	Frugivore.Herbivore	Cuniculus	paca	Cuniculus_paca	1	undefined
IGA-1-04	Igapo	2018	59	2018-10-18	2018-12-16	2018-12-04	00:47:35	MAMMAL	Frugivore.Herbivore	Cuniculus	paca	Cuniculus_paca	1	undefined
IGA-1-04	Igapo	2018	59	2018-10-18	2018-12-16	2018-12-16	15:12:48	INSTALL	Retrieval	Retrieval	Retrieval	Pickup	1	undefined
IGA-1-04	Igapo	2018	59	2018-10-18	2018-12-16	2018-10-18	17:32:17	INSTALL	Setup	Setup	Setup	Setup	1	undefined
IGA-2-04	Igapo	2019	61	2019-10-15	2019-12-15	2019-11-24	00:37:06	MAMMAL	Frugivore.Herbivore	Cuniculus	paca	Cuniculus_paca	1	undefined
IGA-2-04	Igapo	2019	61	2019-10-15	2019-12-15	2019-11-02	09:27:15	MAMMAL	Frugivore.Herbivore	Dicotyles	tajacu	Dicotyles_tajacu	1	undefined
IGA-2-04	Igapo	2019	61	2019-10-15	2019-12-15	2019-12-02	18:59:51	MAMMAL	Frugivore.Herbivore	Cuniculus	paca	Cuniculus_paca	1	undefined
IGA-2-04	Igapo	2019	61	2019-10-15	2019-12-15	2019-12-02	20:32:37	MAMMAL	Frugivore.Herbivore	Cuniculus	paca	Cuniculus_paca	1	undefined
IGA-2-04	Igapo	2019	61	2019-10-15	2019-12-15	2019-12-03	23:07:28	MAMMAL	Frugivore.Herbivore	Cuniculus	paca	Cuniculus_paca	1	undefined
IGA-2-04	Igapo	2019	61	2019-10-15	2019-12-15	2019-11-20	02:05:13	MAMMAL	Frugivore.Herbivore	Cuniculus	paca	Cuniculus_paca	1	undefined
IGA-2-04	Igapo	2019	61	2019-10-15	2019-12-15	2019-12-04	19:41:02	MAMMAL	Frugivore.Herbivore	Cuniculus	paca	Cuniculus_paca	1	undefined
IGA-2-04	Igapo	2019	61	2019-10-15	2019-12-15	2019-10-18	20:10:51	MAMMAL	Frugivore.Herbivore	Cuniculus	paca	Cuniculus_paca	1	undefined
IGA-2-04	Igapo	2019	61	2019-10-15	2019-12-15	2019-11-08	18:28:50	MAMMAL	Frugivore.Herbivore	Cuniculus	paca	Cuniculus_paca	1	undefined
IGA-2-04	Igapo	2019	61	2019-10-15	2019-12-15	2019-12-15	10:54:59	INSTALL	Retrieval	Retrieval	Retrieval	Pickup	1	undefined
IGA-2-04	Igapo	2019	61	2019-10-15	2019-12-15	2019-10-16	19:18:42	MAMMAL	Frugivore.Herbivore	Cuniculus	paca	Cuniculus_paca	1	undefined
IGA-2-04	Igapo	2019	61	2019-10-15	2019-12-15	2019-11-10	04:20:29	MAMMAL	Frugivore.Herbivore	Cuniculus	paca	Cuniculus_paca	1	undefined
IGA-2-04	Igapo	2019	61	2019-10-15	2019-12-15	2019-10-15	10:04:18	INSTALL	Setup	Setup	Setup	Setup	1	undefined
IGA-2-04	Igapo	2019	61	2019-10-15	2019-12-15	2019-11-12	11:46:27	MAMMAL	Frugivore.Omnivore	Eira	barbara	Eira_barbara	1	undefined
IGA-1-05	Igapo	2018	53	2018-10-19	2018-12-11	2018-12-08	21:13:36	MAMMAL	Frugivore.Herbivore	Tapirus	terrestris	Tapirus_terrestris	1	undefined
IGA-1-05	Igapo	2018	53	2018-10-19	2018-12-11	2018-12-06	12:23:40	MAMMAL	Frugivore.Granivore	Dasyprocta	leporina	Dasyprocta_leporina	1	undefined
IGA-1-05	Igapo	2018	53	2018-10-19	2018-12-11	2018-12-06	15:27:50	MAMMAL	Frugivore.Granivore	Dasyprocta	leporina	Dasyprocta_leporina	1	undefined
IGA-1-05	Igapo	2018	53	2018-10-19	2018-12-11	2018-12-11	09:06:16	INSTALL	Retrieval	Retrieval	Retrieval	Pickup	1	undefined
IGA-1-05	Igapo	2018	53	2018-10-19	2018-12-11	2018-11-15	10:57:37	MAMMAL	Frugivore.Granivore	Dasyprocta	leporina	Dasyprocta_leporina	1	undefined
IGA-1-05	Igapo	2018	53	2018-10-19	2018-12-11	2018-11-15	16:07:18	MAMMAL	Frugivore.Granivore	Dasyprocta	leporina	Dasyprocta_leporina	1	undefined
IGA-1-05	Igapo	2018	53	2018-10-19	2018-12-11	2018-11-28	06:05:03	MAMMAL	Frugivore.Granivore	Dasyprocta	leporina	Dasyprocta_leporina	1	undefined
IGA-1-05	Igapo	2018	53	2018-10-19	2018-12-11	2018-10-19	10:14:00	INSTALL	Setup	Setup	Setup	Setup	1	undefined
IGA-1-05	Igapo	2018	53	2018-10-19	2018-12-11	2018-11-27	13:12:42	MAMMAL	Frugivore.Granivore	Dasyprocta	leporina	Dasyprocta_leporina	1	undefined
IGA-1-05	Igapo	2018	53	2018-10-19	2018-12-11	2018-10-21	15:45:32	MAMMAL	Frugivore.Granivore	Dasyprocta	leporina	Dasyprocta_leporina	1	undefined
IGA-1-05	Igapo	2018	53	2018-10-19	2018-12-11	2018-11-21	16:53:34	MAMMAL	Frugivore.Granivore	Dasyprocta	leporina	Dasyprocta_leporina	1	undefined
IGA-1-05	Igapo	2018	53	2018-10-19	2018-12-11	2018-11-23	15:49:23	MAMMAL	Frugivore.Granivore	Dasyprocta	leporina	Dasyprocta_leporina	2	undefined
IGA-2-05	Igapo	2019	61	2019-10-15	2019-12-15	2019-10-29	01:55:16	MAMMAL	Frugivore.Herbivore	Cuniculus	paca	Cuniculus_paca	1	undefined
IGA-2-05	Igapo	2019	61	2019-10-15	2019-12-15	2019-10-31	17:15:53	MAMMAL	Frugivore.Granivore	Dasyprocta	leporina	Dasyprocta_leporina	1	undefined
IGA-2-05	Igapo	2019	61	2019-10-15	2019-12-15	2019-10-25	12:26:15	MAMMAL	Frugivore.Granivore	Dasyprocta	leporina	Dasyprocta_leporina	1	undefined
IGA-2-05	Igapo	2019	61	2019-10-15	2019-12-15	2019-10-22	08:02:35	MAMMAL	Frugivore.Herbivore	Tapirus	terrestris	Tapirus_terrestris	1	Male
IGA-2-05	Igapo	2019	61	2019-10-15	2019-12-15	2019-10-19	13:03:43	MAMMAL	Frugivore.Granivore	Dasyprocta	leporina	Dasyprocta_leporina	1	undefined
IGA-2-05	Igapo	2019	61	2019-10-15	2019-12-15	2019-11-15	10:48:08	MAMMAL	Frugivore.Granivore	Dasyprocta	leporina	Dasyprocta_leporina	1	undefined
IGA-2-05	Igapo	2019	61	2019-10-15	2019-12-15	2019-10-15	12:19:45	INSTALL	Setup	Setup	Setup	Setup	1	undefined
IGA-2-05	Igapo	2019	61	2019-10-15	2019-12-15	2019-11-13	20:44:45	MAMMAL	Carnivore	Leopardus	wiedii	Leopardus_wiedii	1	undefined
IGA-1-06	Igapo	2018	53	2018-10-19	2018-12-11	2018-12-11	09:59:25	INSTALL	Retrieval	Retrieval	Retrieval	Pickup	1	undefined
IGA-1-06	Igapo	2018	53	2018-10-19	2018-12-11	2018-10-19	08:49:27	INSTALL	Setup	Setup	Setup	Setup	1	undefined
IGA-2-06	Igapo	2019	61	2019-10-15	2019-12-15	2019-10-31	21:16:02	MAMMAL	Frugivore.Herbivore	Tapirus	terrestris	Tapirus_terrestris	1	Male
IGA-2-06	Igapo	2019	61	2019-10-15	2019-12-15	2019-11-21	20:39:56	MAMMAL	Carnivore	Puma	concolor	Puma_concolor	1	undefined
IGA-2-06	Igapo	2019	61	2019-10-15	2019-12-15	2019-12-15	10:15:12	INSTALL	Retrieval	Retrieval	Retrieval	Pickup	1	undefined
IGA-2-06	Igapo	2019	61	2019-10-15	2019-12-15	2019-10-15	11:00:43	INSTALL	Setup	Setup	Setup	Setup	1	undefined
IGA-1-07	Igapo	2018	61	2018-10-19	2018-12-19	2018-11-09	21:05:15	MAMMAL	Insectivore.Omnivore	Philander	opossum	Philander_opossum	1	undefined
IGA-1-07	Igapo	2018	61	2018-10-19	2018-12-19	2018-12-09	16:02:18	INSTALL	Retrieval	Retrieval	Retrieval	Pickup	1	undefined
IGA-1-07	Igapo	2018	61	2018-10-19	2018-12-19	2018-11-06	22:21:49	MAMMAL	Insectivore.Omnivore	Philander	opossum	Philander_opossum	1	undefined
IGA-1-07	Igapo	2018	61	2018-10-19	2018-12-19	2018-11-04	20:44:58	MAMMAL	Insectivore.Omnivore	Philander	opossum	Philander_opossum	1	undefined
IGA-1-07	Igapo	2018	61	2018-10-19	2018-12-19	2018-10-19	09:55:55	INSTALL	Setup	Setup	Setup	Setup	1	undefined
IGA-1-07	Igapo	2018	61	2018-10-19	2018-12-19	2018-10-29	14:35:47	MAMMAL	Frugivore.Granivore	Dasyprocta	leporina	Dasyprocta_leporina	1	undefined
IGA-1-07	Igapo	2018	61	2018-10-19	2018-12-19	2018-10-20	01:00:48	MAMMAL	Insectivore.Omnivore	Philander	opossum	Philander_opossum	1	undefined
IGA-1-07	Igapo	2018	61	2018-10-19	2018-12-19	2018-10-25	03:09:53	MAMMAL	Frugivore.Granivore	Proechimys	spp.	Proechimys_spp.	1	undefined
IGA-2-07	Igapo	2019	60	2019-10-16	2019-12-15	2019-11-22	23:23:50	MAMMAL	Carnivore	Leopardus	wiedii	Leopardus_wiedii	1	undefined
IGA-2-07	Igapo	2019	60	2019-10-16	2019-12-15	2019-11-20	00:44:32	MAMMAL	Carnivore	Leopardus	pardalis	Leopardus_pardalis	1	undefined
IGA-2-07	Igapo	2019	60	2019-10-16	2019-12-15	2019-12-05	13:31:17	MAMMAL	Frugivore.Omnivore	Eira	barbara	Eira_barbara	1	undefined
IGA-2-07	Igapo	2019	60	2019-10-16	2019-12-15	2019-12-06	14:22:29	MAMMAL	Frugivore.Granivore	Dasyprocta	leporina	Dasyprocta_leporina	1	undefined
IGA-2-07	Igapo	2019	60	2019-10-16	2019-12-15	2019-10-17	21:01:22	MAMMAL	Insectivore.Omnivore	Philander	opossum	Philander_opossum	1	undefined
IGA-2-07	Igapo	2019	60	2019-10-16	2019-12-15	2019-12-15	12:43:44	INSTALL	Retrieval	Retrieval	Retrieval	Pickup	1	undefined
IGA-2-07	Igapo	2019	60	2019-10-16	2019-12-15	2019-10-16	07:17:27	INSTALL	Setup	Setup	Setup	Setup	1	undefined
IGA-1-08	Igapo	2018	78	2018-10-19	2019-01-05	2019-01-05	12:12:59	INSTALL	Retrieval	Retrieval	Retrieval	Pickup	1	undefined
IGA-1-08	Igapo	2018	78	2018-10-19	2019-01-05	2018-10-19	12:32:33	INSTALL	Setup	Setup	Setup	Setup	1	undefined
IGA-1-08	Igapo	2018	78	2018-10-19	2019-01-05	2018-10-27	23:05:45	MAMMAL	Carnivore	Leopardus	wiedii	Leopardus_wiedii	1	undefined
IGA-2-08	Igapo	2019	60	2019-10-16	2019-12-15	2019-12-15	13:02:00	INSTALL	Retrieval	Retrieval	Retrieval	Pickup	1	undefined
IGA-2-08	Igapo	2019	60	2019-10-16	2019-12-15	2019-10-16	07:39:36	INSTALL	Setup	Setup	Setup	Setup	1	undefined
IGA-1-09	Igapo	2018	53	2018-10-19	2018-12-11	2018-12-11	10:41:56	INSTALL	Retrieval	Retrieval	Retrieval	Pickup	1	undefined
IGA-1-09	Igapo	2018	53	2018-10-19	2018-12-11	2018-11-30	01:42:58	MAMMAL	Carnivore	Leopardus	wiedii	Leopardus_wiedii	1	undefined
IGA-1-09	Igapo	2018	53	2018-10-19	2018-12-11	2018-11-29	23:35:59	MAMMAL	Frugivore.Omnivore	Didelphis	marsupialis	Didelphis_marsupialis	1	undefined
IGA-1-09	Igapo	2018	53	2018-10-19	2018-12-11	2018-10-19	13:14:36	INSTALL	Setup	Setup	Setup	Setup	1	undefined
IGA-1-09	Igapo	2018	53	2018-10-19	2018-12-11	2018-10-28	21:25:23	MAMMAL	Carnivore	Leopardus	wiedii	Leopardus_wiedii	1	undefined
IGA-1-09	Igapo	2018	53	2018-10-19	2018-12-11	2018-10-28	20:36:04	MAMMAL	Frugivore.Granivore	Proechimys	spp.	Proechimys_spp.	1	undefined
IGA-2-09	Igapo	2019	60	2019-10-16	2019-12-15	2019-12-15	13:14:00	INSTALL	Retrieval	Retrieval	Retrieval	Pickup	1	undefined
IGA-2-09	Igapo	2019	60	2019-10-16	2019-12-15	2019-10-16	08:06:19	INSTALL	Setup	Setup	Setup	Setup	1	undefined
IGA-1-10	Igapo	2018	51	2018-10-19	2018-12-09	2018-12-06	00:30:58	MAMMAL	Frugivore.Herbivore	Mazama	americana	Mazama_americana	1	undefined
IGA-1-10	Igapo	2018	51	2018-10-19	2018-12-09	2018-12-09	15:34:16	INSTALL	Retrieval	Retrieval	Retrieval	Pickup	1	undefined
IGA-1-10	Igapo	2018	51	2018-10-19	2018-12-09	2018-12-01	19:45:59	MAMMAL	Frugivore.Omnivore	Didelphis	marsupialis	Didelphis_marsupialis	1	undefined
IGA-1-10	Igapo	2018	51	2018-10-19	2018-12-09	2018-11-28	05:53:46	MAMMAL	Frugivore.Granivore	Dasyprocta	leporina	Dasyprocta_leporina	1	undefined
IGA-1-10	Igapo	2018	51	2018-10-19	2018-12-09	2018-11-28	02:20:52	MAMMAL	Frugivore.Omnivore	Didelphis	marsupialis	Didelphis_marsupialis	1	undefined
IGA-1-10	Igapo	2018	51	2018-10-19	2018-12-09	2018-10-19	14:05:18	INSTALL	Setup	Setup	Setup	Setup	1	undefined
IGA-1-10	Igapo	2018	51	2018-10-19	2018-12-09	2018-10-29	06:23:04	MAMMAL	Frugivore.Herbivore	Dicotyles	tajacu	Dicotyles_tajacu	1	undefined
IGA-1-10	Igapo	2018	51	2018-10-19	2018-12-09	2018-11-27	20:16:49	MAMMAL	Frugivore.Omnivore	Didelphis	marsupialis	Didelphis_marsupialis	1	undefined
IGA-1-10	Igapo	2018	51	2018-10-19	2018-12-09	2018-10-28	18:42:24	MAMMAL	Frugivore.Herbivore	Dicotyles	tajacu	Dicotyles_tajacu	1	undefined
IGA-1-10	Igapo	2018	51	2018-10-19	2018-12-09	2018-11-19	07:22:22	MAMMAL	Frugivore.Herbivore	Mazama	americana	Mazama_americana	1	undefined
IGA-1-10	Igapo	2018	51	2018-10-19	2018-12-09	2018-10-27	20:06:57	MAMMAL	Frugivore.Omnivore	Didelphis	marsupialis	Didelphis_marsupialis	1	undefined
IGA-1-10	Igapo	2018	51	2018-10-19	2018-12-09	2018-10-25	06:41:05	MAMMAL	Frugivore.Herbivore	Dicotyles	tajacu	Dicotyles_tajacu	2	undefined
IGA-1-10	Igapo	2018	51	2018-10-19	2018-12-09	2018-11-23	16:41:06	MAMMAL	Frugivore.Granivore	Dasyprocta	leporina	Dasyprocta_leporina	2	undefined
IGA-1-10	Igapo	2018	51	2018-10-19	2018-12-09	2018-10-24	10:42:39	MAMMAL	Frugivore.Granivore	Dasyprocta	leporina	Dasyprocta_leporina	1	undefined
IGA-1-10	Igapo	2018	51	2018-10-19	2018-12-09	2018-10-24	16:52:46	MAMMAL	Frugivore.Herbivore	Dicotyles	tajacu	Dicotyles_tajacu	2	undefined
IGA-2-10	Igapo	2019	60	2019-10-16	2019-12-15	2019-11-27	17:16:37	MAMMAL	Frugivore.Granivore	Dasyprocta	leporina	Dasyprocta_leporina	1	undefined
IGA-2-10	Igapo	2019	60	2019-10-16	2019-12-15	2019-11-27	17:47:37	MAMMAL	Frugivore.Herbivore	Dicotyles	tajacu	Dicotyles_tajacu	3	undefined
IGA-2-10	Igapo	2019	60	2019-10-16	2019-12-15	2019-11-28	05:25:15	MAMMAL	Frugivore.Herbivore	Dicotyles	tajacu	Dicotyles_tajacu	1	undefined
IGA-2-10	Igapo	2019	60	2019-10-16	2019-12-15	2019-11-28	11:47:08	MAMMAL	Frugivore.Herbivore	Dicotyles	tajacu	Dicotyles_tajacu	1	undefined
IGA-2-10	Igapo	2019	60	2019-10-16	2019-12-15	2019-10-27	22:12:29	MAMMAL	Frugivore.Omnivore	Didelphis	marsupialis	Didelphis_marsupialis	1	undefined
IGA-2-10	Igapo	2019	60	2019-10-16	2019-12-15	2019-11-30	16:20:36	MAMMAL	Frugivore.Granivore	Dasyprocta	leporina	Dasyprocta_leporina	1	undefined
IGA-2-10	Igapo	2019	60	2019-10-16	2019-12-15	2019-10-23	01:23:39	MAMMAL	Frugivore.Omnivore	Didelphis	marsupialis	Didelphis_marsupialis	1	undefined
IGA-2-10	Igapo	2019	60	2019-10-16	2019-12-15	2019-10-23	03:04:29	MAMMAL	Frugivore.Omnivore	Didelphis	marsupialis	Didelphis_marsupialis	1	undefined
IGA-2-10	Igapo	2019	60	2019-10-16	2019-12-15	2019-10-23	15:04:32	MAMMAL	Frugivore.Herbivore	Dicotyles	tajacu	Dicotyles_tajacu	3	undefined
IGA-2-10	Igapo	2019	60	2019-10-16	2019-12-15	2019-11-21	08:54:40	MAMMAL	Frugivore.Granivore	Dasyprocta	leporina	Dasyprocta_leporina	2	undefined
IGA-2-10	Igapo	2019	60	2019-10-16	2019-12-15	2019-11-20	06:49:24	MAMMAL	Frugivore.Granivore	Dasyprocta	leporina	Dasyprocta_leporina	2	undefined
IGA-2-10	Igapo	2019	60	2019-10-16	2019-12-15	2019-11-19	01:52:19	MAMMAL	Frugivore.Omnivore	Didelphis	marsupialis	Didelphis_marsupialis	1	undefined
IGA-2-10	Igapo	2019	60	2019-10-16	2019-12-15	2019-12-05	11:39:31	MAMMAL	Frugivore.Herbivore	Dicotyles	tajacu	Dicotyles_tajacu	1	undefined
IGA-2-10	Igapo	2019	60	2019-10-16	2019-12-15	2019-11-18	16:02:50	MAMMAL	Frugivore.Granivore	Dasyprocta	leporina	Dasyprocta_leporina	1	undefined
IGA-2-10	Igapo	2019	60	2019-10-16	2019-12-15	2019-12-06	17:46:16	MAMMAL	Carnivore	Leopardus	pardalis	Leopardus_pardalis	1	undefined
IGA-2-10	Igapo	2019	60	2019-10-16	2019-12-15	2019-11-07	09:10:39	MAMMAL	Frugivore.Granivore	Dasyprocta	leporina	Dasyprocta_leporina	1	undefined
IGA-2-10	Igapo	2019	60	2019-10-16	2019-12-15	2019-11-07	23:38:02	MAMMAL	Frugivore.Omnivore	Didelphis	marsupialis	Didelphis_marsupialis	1	undefined
IGA-2-10	Igapo	2019	60	2019-10-16	2019-12-15	2019-12-08	16:52:00	MAMMAL	Frugivore.Granivore	Dasyprocta	leporina	Dasyprocta_leporina	1	undefined
IGA-2-10	Igapo	2019	60	2019-10-16	2019-12-15	2019-12-15	13:34:47	INSTALL	Retrieval	Retrieval	Retrieval	Pickup	1	undefined
IGA-2-10	Igapo	2019	60	2019-10-16	2019-12-15	2019-12-09	09:05:56	MAMMAL	Frugivore.Herbivore	Dicotyles	tajacu	Dicotyles_tajacu	1	undefined
IGA-2-10	Igapo	2019	60	2019-10-16	2019-12-15	2019-12-09	10:46:16	MAMMAL	Frugivore.Herbivore	Dicotyles	tajacu	Dicotyles_tajacu	1	undefined
IGA-2-10	Igapo	2019	60	2019-10-16	2019-12-15	2019-10-16	08:38:36	INSTALL	Setup	Setup	Setup	Setup	1	undefined
IGA-2-10	Igapo	2019	60	2019-10-16	2019-12-15	2019-12-10	15:52:23	MAMMAL	Frugivore.Granivore	Dasyprocta	leporina	Dasyprocta_leporina	1	undefined
IGA-2-10	Igapo	2019	60	2019-10-16	2019-12-15	2019-12-13	10:52:08	MAMMAL	Frugivore.Granivore	Dasyprocta	leporina	Dasyprocta_leporina	1	undefined
IGA-2-10	Igapo	2019	60	2019-10-16	2019-12-15	2019-12-13	13:30:11	MAMMAL	Frugivore.Herbivore	Dicotyles	tajacu	Dicotyles_tajacu	4	undefined
IGA-1-11	Igapo	2018	46	2018-10-24	2018-12-09	2018-12-07	00:47:20	MAMMAL	Frugivore.Herbivore	Cuniculus	paca	Cuniculus_paca	1	undefined
IGA-1-11	Igapo	2018	46	2018-10-24	2018-12-09	2018-12-08	22:43:40	MAMMAL	Frugivore.Herbivore	Cuniculus	paca	Cuniculus_paca	1	undefined
IGA-1-11	Igapo	2018	46	2018-10-24	2018-12-09	2018-12-09	15:15:41	INSTALL	Retrieval	Retrieval	Retrieval	Pickup	1	undefined
IGA-1-11	Igapo	2018	46	2018-10-24	2018-12-09	2018-12-04	02:38:49	MAMMAL	Frugivore.Herbivore	Cuniculus	paca	Cuniculus_paca	2	undefined
IGA-1-11	Igapo	2018	46	2018-10-24	2018-12-09	2018-12-02	16:52:55	MAMMAL	Frugivore.Granivore	Dasyprocta	leporina	Dasyprocta_leporina	1	undefined
IGA-1-11	Igapo	2018	46	2018-10-24	2018-12-09	2018-11-01	13:27:48	MAMMAL	Frugivore.Granivore	Dasyprocta	leporina	Dasyprocta_leporina	1	undefined
IGA-1-11	Igapo	2018	46	2018-10-24	2018-12-09	2018-11-26	13:46:57	MAMMAL	Frugivore.Granivore	Dasyprocta	leporina	Dasyprocta_leporina	1	undefined
IGA-1-11	Igapo	2018	46	2018-10-24	2018-12-09	2018-11-20	04:08:46	MAMMAL	Frugivore.Herbivore	Cuniculus	paca	Cuniculus_paca	2	undefined
IGA-1-11	Igapo	2018	46	2018-10-24	2018-12-09	2018-11-21	13:42:03	MAMMAL	Frugivore.Granivore	Dasyprocta	leporina	Dasyprocta_leporina	1	undefined
IGA-1-11	Igapo	2018	46	2018-10-24	2018-12-09	2018-11-22	07:08:20	MAMMAL	Frugivore.Granivore	Dasyprocta	leporina	Dasyprocta_leporina	1	undefined
IGA-1-11	Igapo	2018	46	2018-10-24	2018-12-09	2018-10-24	08:00:23	INSTALL	Setup	Setup	Setup	Setup	1	undefined
IGA-2-11	Igapo	2019	60	2019-10-16	2019-12-15	2019-11-26	18:04:37	MAMMAL	Frugivore.Granivore	Dasyprocta	leporina	Dasyprocta_leporina	1	undefined
IGA-2-11	Igapo	2019	60	2019-10-16	2019-12-15	2019-10-30	08:23:22	MAMMAL	Frugivore.Granivore	Dasyprocta	leporina	Dasyprocta_leporina	1	undefined
IGA-2-11	Igapo	2019	60	2019-10-16	2019-12-15	2019-11-29	13:10:30	MAMMAL	Frugivore.Granivore	Dasyprocta	leporina	Dasyprocta_leporina	1	undefined
IGA-2-11	Igapo	2019	60	2019-10-16	2019-12-15	2019-10-26	05:44:56	MAMMAL	Frugivore.Granivore	Dasyprocta	leporina	Dasyprocta_leporina	1	undefined
IGA-2-11	Igapo	2019	60	2019-10-16	2019-12-15	2019-10-24	11:27:11	MAMMAL	Frugivore.Granivore	Dasyprocta	leporina	Dasyprocta_leporina	1	undefined
IGA-2-11	Igapo	2019	60	2019-10-16	2019-12-15	2019-12-03	06:04:48	MAMMAL	Frugivore.Granivore	Dasyprocta	leporina	Dasyprocta_leporina	1	undefined
IGA-2-11	Igapo	2019	60	2019-10-16	2019-12-15	2019-10-22	11:48:50	MAMMAL	Frugivore.Granivore	Dasyprocta	leporina	Dasyprocta_leporina	1	undefined
IGA-2-11	Igapo	2019	60	2019-10-16	2019-12-15	2019-10-22	12:52:48	MAMMAL	Frugivore.Granivore	Dasyprocta	leporina	Dasyprocta_leporina	1	undefined
IGA-2-11	Igapo	2019	60	2019-10-16	2019-12-15	2019-12-06	17:43:14	MAMMAL	Frugivore.Granivore	Dasyprocta	leporina	Dasyprocta_leporina	1	undefined
IGA-2-11	Igapo	2019	60	2019-10-16	2019-12-15	2019-12-15	13:58:42	INSTALL	Retrieval	Retrieval	Retrieval	Pickup	1	undefined
IGA-2-11	Igapo	2019	60	2019-10-16	2019-12-15	2019-11-09	17:14:50	MAMMAL	Carnivore	Leopardus	wiedii	Leopardus_wiedii	1	Female
IGA-2-11	Igapo	2019	60	2019-10-16	2019-12-15	2019-10-16	09:13:42	INSTALL	Setup	Setup	Setup	Setup	1	undefined
IGA-1-12	Igapo	2018	46	2018-10-24	2018-12-09	2018-12-07	01:08:30	MAMMAL	Insectivore.Omnivore	Philander	opossum	Philander_opossum	1	undefined
IGA-1-12	Igapo	2018	46	2018-10-24	2018-12-09	2018-12-08	03:32:33	MAMMAL	Insectivore.Omnivore	Metachirus	nudicaudatus	Metachirus_nudicaudatus	1	undefined
IGA-1-12	Igapo	2018	46	2018-10-24	2018-12-09	2018-12-08	02:44:45	MAMMAL	Insectivore.Omnivore	Philander	opossum	Philander_opossum	1	undefined
IGA-1-12	Igapo	2018	46	2018-10-24	2018-12-09	2018-11-09	21:03:43	MAMMAL	Frugivore.Omnivore	Didelphis	marsupialis	Didelphis_marsupialis	1	undefined
IGA-1-12	Igapo	2018	46	2018-10-24	2018-12-09	2018-11-09	23:02:24	MAMMAL	Insectivore.Omnivore	Metachirus	nudicaudatus	Metachirus_nudicaudatus	1	undefined
IGA-1-12	Igapo	2018	46	2018-10-24	2018-12-09	2018-11-09	21:22:11	MAMMAL	Frugivore.Granivore	Proechimys	spp.	Proechimys_spp.	1	undefined
IGA-1-12	Igapo	2018	46	2018-10-24	2018-12-09	2018-12-09	14:48:58	INSTALL	Retrieval	Retrieval	Retrieval	Pickup	1	undefined
IGA-1-12	Igapo	2018	46	2018-10-24	2018-12-09	2018-12-05	17:21:01	MAMMAL	Frugivore.Herbivore	Mazama	nemorivaga	Mazama_nemorivaga	1	undefined
IGA-1-12	Igapo	2018	46	2018-10-24	2018-12-09	2018-11-05	02:01:38	MAMMAL	Frugivore.Omnivore	Didelphis	marsupialis	Didelphis_marsupialis	1	undefined
IGA-1-12	Igapo	2018	46	2018-10-24	2018-12-09	2018-11-04	02:26:19	MAMMAL	Frugivore.Omnivore	Didelphis	marsupialis	Didelphis_marsupialis	1	undefined
IGA-1-12	Igapo	2018	46	2018-10-24	2018-12-09	2018-11-04	19:28:50	MAMMAL	Frugivore.Omnivore	Didelphis	marsupialis	Didelphis_marsupialis	1	undefined
IGA-1-12	Igapo	2018	46	2018-10-24	2018-12-09	2018-11-12	00:58:13	MAMMAL	Insectivore.Omnivore	Philander	opossum	Philander_opossum	1	undefined
IGA-1-12	Igapo	2018	46	2018-10-24	2018-12-09	2018-12-03	18:45:08	MAMMAL	Insectivore.Omnivore	Metachirus	nudicaudatus	Metachirus_nudicaudatus	1	undefined
IGA-1-12	Igapo	2018	46	2018-10-24	2018-12-09	2018-12-03	04:50:16	MAMMAL	Insectivore.Omnivore	Philander	opossum	Philander_opossum	1	undefined
IGA-1-12	Igapo	2018	46	2018-10-24	2018-12-09	2018-12-03	23:04:36	MAMMAL	Insectivore.Omnivore	Philander	opossum	Philander_opossum	1	undefined
IGA-1-12	Igapo	2018	46	2018-10-24	2018-12-09	2018-11-03	04:33:35	MAMMAL	Frugivore.Omnivore	Didelphis	marsupialis	Didelphis_marsupialis	1	undefined
IGA-1-12	Igapo	2018	46	2018-10-24	2018-12-09	2018-11-13	00:17:02	MAMMAL	Frugivore.Omnivore	Didelphis	marsupialis	Didelphis_marsupialis	1	undefined
IGA-1-12	Igapo	2018	46	2018-10-24	2018-12-09	2018-11-13	02:26:39	MAMMAL	Frugivore.Omnivore	Didelphis	marsupialis	Didelphis_marsupialis	1	undefined
IGA-1-12	Igapo	2018	46	2018-10-24	2018-12-09	2018-11-13	04:35:04	MAMMAL	Frugivore.Omnivore	Didelphis	marsupialis	Didelphis_marsupialis	1	undefined
IGA-1-12	Igapo	2018	46	2018-10-24	2018-12-09	2018-12-01	00:18:40	MAMMAL	Insectivore.Omnivore	Philander	opossum	Philander_opossum	1	undefined
IGA-1-12	Igapo	2018	46	2018-10-24	2018-12-09	2018-11-15	21:25:24	MAMMAL	Insectivore.Omnivore	Philander	opossum	Philander_opossum	1	undefined
IGA-1-12	Igapo	2018	46	2018-10-24	2018-12-09	2018-11-30	19:18:30	MAMMAL	Frugivore.Omnivore	Didelphis	marsupialis	Didelphis_marsupialis	1	undefined
IGA-1-12	Igapo	2018	46	2018-10-24	2018-12-09	2018-10-31	00:19:44	MAMMAL	Insectivore.Omnivore	Metachirus	nudicaudatus	Metachirus_nudicaudatus	1	undefined
IGA-1-12	Igapo	2018	46	2018-10-24	2018-12-09	2018-11-16	22:57:28	MAMMAL	Insectivore.Omnivore	Philander	opossum	Philander_opossum	1	undefined
IGA-1-12	Igapo	2018	46	2018-10-24	2018-12-09	2018-10-30	18:48:38	MAMMAL	Insectivore.Omnivore	Metachirus	nudicaudatus	Metachirus_nudicaudatus	1	undefined
IGA-1-12	Igapo	2018	46	2018-10-24	2018-12-09	2018-10-29	18:51:10	MAMMAL	Insectivore.Omnivore	Metachirus	nudicaudatus	Metachirus_nudicaudatus	1	undefined
IGA-1-12	Igapo	2018	46	2018-10-24	2018-12-09	2018-10-29	21:02:21	MAMMAL	Insectivore.Omnivore	Metachirus	nudicaudatus	Metachirus_nudicaudatus	1	undefined
IGA-1-12	Igapo	2018	46	2018-10-24	2018-12-09	2018-10-29	19:43:40	MAMMAL	Insectivore.Omnivore	Philander	opossum	Philander_opossum	1	undefined
IGA-1-12	Igapo	2018	46	2018-10-24	2018-12-09	2018-11-18	18:33:17	MAMMAL	Insectivore.Omnivore	Philander	opossum	Philander_opossum	1	undefined
IGA-1-12	Igapo	2018	46	2018-10-24	2018-12-09	2018-10-28	00:42:53	MAMMAL	Frugivore.Omnivore	Didelphis	marsupialis	Didelphis_marsupialis	1	undefined
IGA-1-12	Igapo	2018	46	2018-10-24	2018-12-09	2018-10-28	18:53:42	MAMMAL	Frugivore.Omnivore	Didelphis	marsupialis	Didelphis_marsupialis	1	undefined
IGA-1-12	Igapo	2018	46	2018-10-24	2018-12-09	2018-10-28	16:18:52	MAMMAL	Frugivore.Herbivore	Mazama	nemorivaga	Mazama_nemorivaga	1	undefined
IGA-1-12	Igapo	2018	46	2018-10-24	2018-12-09	2018-10-28	04:14:31	MAMMAL	Frugivore.Granivore	Proechimys	spp.	Proechimys_spp.	1	undefined
IGA-1-12	Igapo	2018	46	2018-10-24	2018-12-09	2018-11-19	18:07:29	MAMMAL	Frugivore.Omnivore	Didelphis	marsupialis	Didelphis_marsupialis	1	undefined
IGA-1-12	Igapo	2018	46	2018-10-24	2018-12-09	2018-11-19	16:33:52	MAMMAL	Frugivore.Herbivore	Mazama	nemorivaga	Mazama_nemorivaga	1	undefined
IGA-1-12	Igapo	2018	46	2018-10-24	2018-12-09	2018-10-27	03:22:56	MAMMAL	Frugivore.Omnivore	Didelphis	marsupialis	Didelphis_marsupialis	1	undefined
IGA-1-12	Igapo	2018	46	2018-10-24	2018-12-09	2018-10-27	00:59:16	MAMMAL	Insectivore.Omnivore	Metachirus	nudicaudatus	Metachirus_nudicaudatus	1	undefined
IGA-1-12	Igapo	2018	46	2018-10-24	2018-12-09	2018-10-26	21:20:19	MAMMAL	Frugivore.Omnivore	Didelphis	marsupialis	Didelphis_marsupialis	1	undefined
IGA-1-12	Igapo	2018	46	2018-10-24	2018-12-09	2018-10-26	19:54:14	MAMMAL	Insectivore.Omnivore	Metachirus	nudicaudatus	Metachirus_nudicaudatus	1	undefined
IGA-1-12	Igapo	2018	46	2018-10-24	2018-12-09	2018-11-21	16:33:13	MAMMAL	Frugivore.Granivore	Dasyprocta	leporina	Dasyprocta_leporina	1	undefined
IGA-1-12	Igapo	2018	46	2018-10-24	2018-12-09	2018-11-21	04:30:07	MAMMAL	Insectivore.Omnivore	Philander	opossum	Philander_opossum	1	undefined
IGA-1-12	Igapo	2018	46	2018-10-24	2018-12-09	2018-11-24	01:26:02	MAMMAL	Insectivore.Omnivore	Metachirus	nudicaudatus	Metachirus_nudicaudatus	1	undefined
IGA-1-12	Igapo	2018	46	2018-10-24	2018-12-09	2018-10-25	00:12:19	MAMMAL	Frugivore.Omnivore	Didelphis	marsupialis	Didelphis_marsupialis	1	undefined
IGA-1-12	Igapo	2018	46	2018-10-24	2018-12-09	2018-10-25	23:54:09	MAMMAL	Frugivore.Omnivore	Didelphis	marsupialis	Didelphis_marsupialis	1	undefined
IGA-1-12	Igapo	2018	46	2018-10-24	2018-12-09	2018-11-23	15:02:05	MAMMAL	Frugivore.Granivore	Dasyprocta	leporina	Dasyprocta_leporina	1	undefined
IGA-1-12	Igapo	2018	46	2018-10-24	2018-12-09	2018-11-23	04:30:51	MAMMAL	Insectivore.Omnivore	Philander	opossum	Philander_opossum	1	undefined
IGA-1-12	Igapo	2018	46	2018-10-24	2018-12-09	2018-11-23	23:42:06	MAMMAL	Insectivore.Omnivore	Philander	opossum	Philander_opossum	1	undefined
IGA-1-12	Igapo	2018	46	2018-10-24	2018-12-09	2018-10-24	09:05:44	INSTALL	Setup	Setup	Setup	Setup	1	undefined
IGA-1-12	Igapo	2018	46	2018-10-24	2018-12-09	2018-10-24	20:14:45	MAMMAL	Insectivore.Omnivore	Metachirus	nudicaudatus	Metachirus_nudicaudatus	1	undefined
IGA-1-12	Igapo	2018	46	2018-10-24	2018-12-09	2018-10-24	22:15:06	MAMMAL	Insectivore.Omnivore	Metachirus	nudicaudatus	Metachirus_nudicaudatus	1	undefined
IGA-1-12	Igapo	2018	46	2018-10-24	2018-12-09	2018-10-24	19:06:30	MAMMAL	Insectivore.Omnivore	Philander	opossum	Philander_opossum	1	undefined
IGA-2-12	Igapo	2019	61	2019-10-16	2019-12-16	2019-11-27	07:27:19	MAMMAL	Frugivore.Granivore	Dasyprocta	leporina	Dasyprocta_leporina	1	undefined
IGA-2-12	Igapo	2019	61	2019-10-16	2019-12-16	2019-11-27	16:55:53	MAMMAL	Frugivore.Granivore	Dasyprocta	leporina	Dasyprocta_leporina	1	undefined
IGA-2-12	Igapo	2019	61	2019-10-16	2019-12-16	2019-10-28	17:00:26	MAMMAL	Frugivore.Granivore	Dasyprocta	leporina	Dasyprocta_leporina	1	undefined
IGA-2-12	Igapo	2019	61	2019-10-16	2019-12-16	2019-10-29	17:32:13	MAMMAL	Frugivore.Granivore	Dasyprocta	leporina	Dasyprocta_leporina	1	undefined
IGA-2-12	Igapo	2019	61	2019-10-16	2019-12-16	2019-11-28	02:52:38	MAMMAL	Frugivore.Herbivore	Cuniculus	paca	Cuniculus_paca	1	undefined
IGA-2-12	Igapo	2019	61	2019-10-16	2019-12-16	2019-11-28	07:57:27	MAMMAL	Frugivore.Granivore	Dasyprocta	leporina	Dasyprocta_leporina	1	undefined
IGA-2-12	Igapo	2019	61	2019-10-16	2019-12-16	2019-11-28	17:39:14	MAMMAL	Frugivore.Granivore	Dasyprocta	leporina	Dasyprocta_leporina	1	undefined
IGA-2-12	Igapo	2019	61	2019-10-16	2019-12-16	2019-10-27	16:28:34	MAMMAL	Frugivore.Herbivore	Mazama	nemorivaga	Mazama_nemorivaga	1	Female
IGA-2-12	Igapo	2019	61	2019-10-16	2019-12-16	2019-10-27	21:43:29	MAMMAL	Frugivore.Granivore	Proechimys	spp.	Proechimys_spp.	1	undefined
IGA-2-12	Igapo	2019	61	2019-10-16	2019-12-16	2019-10-30	02:52:20	MAMMAL	Frugivore.Herbivore	Cuniculus	paca	Cuniculus_paca	1	undefined
IGA-2-12	Igapo	2019	61	2019-10-16	2019-12-16	2019-10-30	09:29:27	MAMMAL	Frugivore.Granivore	Dasyprocta	leporina	Dasyprocta_leporina	1	undefined
IGA-2-12	Igapo	2019	61	2019-10-16	2019-12-16	2019-11-29	09:56:19	MAMMAL	Frugivore.Granivore	Dasyprocta	leporina	Dasyprocta_leporina	1	undefined
IGA-2-12	Igapo	2019	61	2019-10-16	2019-12-16	2019-10-26	07:02:25	MAMMAL	Frugivore.Granivore	Dasyprocta	leporina	Dasyprocta_leporina	1	undefined
IGA-2-12	Igapo	2019	61	2019-10-16	2019-12-16	2019-10-26	17:17:29	MAMMAL	Frugivore.Granivore	Dasyprocta	leporina	Dasyprocta_leporina	1	undefined
IGA-2-12	Igapo	2019	61	2019-10-16	2019-12-16	2019-10-31	18:04:55	MAMMAL	Frugivore.Granivore	Dasyprocta	leporina	Dasyprocta_leporina	1	undefined
IGA-2-12	Igapo	2019	61	2019-10-16	2019-12-16	2019-11-24	17:16:21	MAMMAL	Frugivore.Granivore	Dasyprocta	leporina	Dasyprocta_leporina	1	undefined
IGA-2-12	Igapo	2019	61	2019-10-16	2019-12-16	2019-11-30	06:57:17	MAMMAL	Frugivore.Granivore	Dasyprocta	leporina	Dasyprocta_leporina	1	undefined
IGA-2-12	Igapo	2019	61	2019-10-16	2019-12-16	2019-11-01	16:19:12	MAMMAL	Frugivore.Granivore	Dasyprocta	leporina	Dasyprocta_leporina	1	undefined
IGA-2-12	Igapo	2019	61	2019-10-16	2019-12-16	2019-11-23	15:27:57	MAMMAL	Frugivore.Granivore	Dasyprocta	leporina	Dasyprocta_leporina	1	undefined
IGA-2-12	Igapo	2019	61	2019-10-16	2019-12-16	2019-11-23	17:36:57	MAMMAL	Frugivore.Granivore	Dasyprocta	leporina	Dasyprocta_leporina	1	undefined
IGA-2-12	Igapo	2019	61	2019-10-16	2019-12-16	2019-10-24	07:33:54	MAMMAL	Frugivore.Granivore	Dasyprocta	leporina	Dasyprocta_leporina	1	undefined
IGA-2-12	Igapo	2019	61	2019-10-16	2019-12-16	2019-10-24	17:33:20	MAMMAL	Frugivore.Granivore	Dasyprocta	leporina	Dasyprocta_leporina	1	undefined
IGA-2-12	Igapo	2019	61	2019-10-16	2019-12-16	2019-11-22	23:39:36	MAMMAL	Frugivore.Herbivore	Cuniculus	paca	Cuniculus_paca	1	undefined
IGA-2-12	Igapo	2019	61	2019-10-16	2019-12-16	2019-10-23	07:33:45	MAMMAL	Frugivore.Granivore	Dasyprocta	leporina	Dasyprocta_leporina	1	undefined
IGA-2-12	Igapo	2019	61	2019-10-16	2019-12-16	2019-11-03	07:22:21	MAMMAL	Frugivore.Granivore	Dasyprocta	leporina	Dasyprocta_leporina	1	undefined
IGA-2-12	Igapo	2019	61	2019-10-16	2019-12-16	2019-11-21	10:05:50	MAMMAL	Frugivore.Granivore	Dasyprocta	leporina	Dasyprocta_leporina	1	undefined
IGA-2-12	Igapo	2019	61	2019-10-16	2019-12-16	2019-12-03	09:47:19	MAMMAL	Frugivore.Granivore	Dasyprocta	leporina	Dasyprocta_leporina	1	undefined
IGA-2-12	Igapo	2019	61	2019-10-16	2019-12-16	2019-10-22	07:22:40	MAMMAL	Frugivore.Granivore	Dasyprocta	leporina	Dasyprocta_leporina	1	undefined
IGA-2-12	Igapo	2019	61	2019-10-16	2019-12-16	2019-11-04	03:32:16	MAMMAL	Frugivore.Herbivore	Cuniculus	paca	Cuniculus_paca	1	undefined
IGA-2-12	Igapo	2019	61	2019-10-16	2019-12-16	2019-11-20	13:41:38	MAMMAL	Frugivore.Granivore	Dasyprocta	leporina	Dasyprocta_leporina	1	undefined
IGA-2-12	Igapo	2019	61	2019-10-16	2019-12-16	2019-10-21	08:23:15	MAMMAL	Frugivore.Granivore	Dasyprocta	leporina	Dasyprocta_leporina	1	undefined
IGA-2-12	Igapo	2019	61	2019-10-16	2019-12-16	2019-11-05	01:41:13	MAMMAL	Frugivore.Herbivore	Cuniculus	paca	Cuniculus_paca	1	undefined
IGA-2-12	Igapo	2019	61	2019-10-16	2019-12-16	2019-11-05	09:39:08	MAMMAL	Frugivore.Granivore	Dasyprocta	leporina	Dasyprocta_leporina	1	undefined
IGA-2-12	Igapo	2019	61	2019-10-16	2019-12-16	2019-11-05	17:29:40	MAMMAL	Frugivore.Granivore	Dasyprocta	leporina	Dasyprocta_leporina	1	undefined
IGA-2-12	Igapo	2019	61	2019-10-16	2019-12-16	2019-10-20	20:33:24	MAMMAL	Frugivore.Herbivore	Cuniculus	paca	Cuniculus_paca	1	undefined
IGA-2-12	Igapo	2019	61	2019-10-16	2019-12-16	2019-11-06	08:30:07	MAMMAL	Frugivore.Granivore	Dasyprocta	leporina	Dasyprocta_leporina	1	undefined
IGA-2-12	Igapo	2019	61	2019-10-16	2019-12-16	2019-11-06	18:02:56	MAMMAL	Frugivore.Granivore	Dasyprocta	leporina	Dasyprocta_leporina	1	undefined
IGA-2-12	Igapo	2019	61	2019-10-16	2019-12-16	2019-11-06	02:50:10	MAMMAL	Insectivore.Omnivore	Philander	opossum	Philander_opossum	1	undefined
IGA-2-12	Igapo	2019	61	2019-10-16	2019-12-16	2019-11-18	20:07:56	MAMMAL	Frugivore.Omnivore	Didelphis	marsupialis	Didelphis_marsupialis	1	undefined
IGA-2-12	Igapo	2019	61	2019-10-16	2019-12-16	2019-11-07	21:05:44	MAMMAL	Frugivore.Herbivore	Tapirus	terrestris	Tapirus_terrestris	2	Couple
IGA-2-12	Igapo	2019	61	2019-10-16	2019-12-16	2019-11-17	22:25:28	MAMMAL	Frugivore.Herbivore	Cuniculus	paca	Cuniculus_paca	1	undefined
IGA-2-12	Igapo	2019	61	2019-10-16	2019-12-16	2019-11-17	17:17:44	MAMMAL	Frugivore.Granivore	Dasyprocta	leporina	Dasyprocta_leporina	1	undefined
IGA-2-12	Igapo	2019	61	2019-10-16	2019-12-16	2019-12-07	16:50:36	MAMMAL	Frugivore.Granivore	Dasyprocta	leporina	Dasyprocta_leporina	1	undefined
IGA-2-12	Igapo	2019	61	2019-10-16	2019-12-16	2019-12-16	13:45:08	INSTALL	Retrieval	Retrieval	Retrieval	Pickup	1	undefined
IGA-2-12	Igapo	2019	61	2019-10-16	2019-12-16	2019-12-16	16:06:32	INSTALL	Retrieval	Retrieval	Retrieval	Pickup	1	undefined
IGA-2-12	Igapo	2019	61	2019-10-16	2019-12-16	2019-11-16	09:28:58	MAMMAL	Frugivore.Granivore	Dasyprocta	leporina	Dasyprocta_leporina	1	undefined
IGA-2-12	Igapo	2019	61	2019-10-16	2019-12-16	2019-11-16	21:59:13	MAMMAL	Carnivore	Leopardus	pardalis	Leopardus_pardalis	1	undefined
IGA-2-12	Igapo	2019	61	2019-10-16	2019-12-16	2019-11-16	18:36:06	MAMMAL	Insectivore.Omnivore	Philander	opossum	Philander_opossum	1	undefined
IGA-2-12	Igapo	2019	61	2019-10-16	2019-12-16	2019-12-15	05:51:42	MAMMAL	Frugivore.Granivore	Dasyprocta	leporina	Dasyprocta_leporina	1	undefined
IGA-2-12	Igapo	2019	61	2019-10-16	2019-12-16	2019-11-15	23:55:34	MAMMAL	Frugivore.Omnivore	Didelphis	marsupialis	Didelphis_marsupialis	1	undefined
IGA-2-12	Igapo	2019	61	2019-10-16	2019-12-16	2019-12-09	11:48:26	MAMMAL	Frugivore.Herbivore	Mazama	nemorivaga	Mazama_nemorivaga	1	Female
IGA-2-12	Igapo	2019	61	2019-10-16	2019-12-16	2019-10-16	11:58:28	INSTALL	Setup	Setup	Setup	Setup	1	undefined
IGA-2-12	Igapo	2019	61	2019-10-16	2019-12-16	2019-12-14	20:29:08	MAMMAL	Frugivore.Herbivore	Cuniculus	paca	Cuniculus_paca	1	undefined
IGA-2-12	Igapo	2019	61	2019-10-16	2019-12-16	2019-12-14	14:12:20	MAMMAL	Frugivore.Granivore	Dasyprocta	leporina	Dasyprocta_leporina	1	undefined
IGA-2-12	Igapo	2019	61	2019-10-16	2019-12-16	2019-12-14	01:30:49	MAMMAL	Carnivore	Leopardus	pardalis	Leopardus_pardalis	1	undefined
IGA-2-12	Igapo	2019	61	2019-10-16	2019-12-16	2019-11-14	18:53:11	MAMMAL	Frugivore.Herbivore	Cuniculus	paca	Cuniculus_paca	1	undefined
IGA-2-12	Igapo	2019	61	2019-10-16	2019-12-16	2019-11-14	08:40:28	MAMMAL	Frugivore.Granivore	Dasyprocta	leporina	Dasyprocta_leporina	1	undefined
IGA-2-12	Igapo	2019	61	2019-10-16	2019-12-16	2019-11-11	07:58:46	MAMMAL	Frugivore.Granivore	Dasyprocta	leporina	Dasyprocta_leporina	1	undefined
IGA-2-12	Igapo	2019	61	2019-10-16	2019-12-16	2019-11-13	08:54:59	MAMMAL	Frugivore.Granivore	Dasyprocta	leporina	Dasyprocta_leporina	1	undefined
IGA-1-13	Igapo	2018	71	2018-10-24	2019-01-03	2019-01-03	13:24:27	INSTALL	Retrieval	Retrieval	Retrieval	Pickup	1	undefined
IGA-1-13	Igapo	2018	71	2018-10-24	2019-01-03	2019-01-01	11:58:30	MAMMAL	Frugivore.Granivore	Dasyprocta	leporina	Dasyprocta_leporina	1	undefined
IGA-1-13	Igapo	2018	71	2018-10-24	2019-01-03	2019-01-01	13:02:50	MAMMAL	Frugivore.Granivore	Dasyprocta	leporina	Dasyprocta_leporina	2	undefined
IGA-1-13	Igapo	2018	71	2018-10-24	2019-01-03	2018-12-01	09:20:18	MAMMAL	Frugivore.Granivore	Dasyprocta	leporina	Dasyprocta_leporina	1	undefined
IGA-1-13	Igapo	2018	71	2018-10-24	2019-01-03	2018-12-14	07:54:42	MAMMAL	Frugivore.Granivore	Dasyprocta	leporina	Dasyprocta_leporina	1	undefined
IGA-1-13	Igapo	2018	71	2018-10-24	2019-01-03	2018-11-01	17:45:55	MAMMAL	Carnivore	Leopardus	wiedii	Leopardus_wiedii	1	undefined
IGA-1-13	Igapo	2018	71	2018-10-24	2019-01-03	2018-12-27	14:58:47	MAMMAL	Frugivore.Granivore	Dasyprocta	leporina	Dasyprocta_leporina	1	undefined
IGA-1-13	Igapo	2018	71	2018-10-24	2019-01-03	2018-11-26	06:49:18	MAMMAL	Carnivore	Puma	concolor	Puma_concolor	1	undefined
IGA-1-13	Igapo	2018	71	2018-10-24	2019-01-03	2018-12-19	15:34:12	MAMMAL	Frugivore.Granivore	Dasyprocta	leporina	Dasyprocta_leporina	1	undefined
IGA-1-13	Igapo	2018	71	2018-10-24	2019-01-03	2018-12-23	14:20:32	MAMMAL	Frugivore.Granivore	Dasyprocta	leporina	Dasyprocta_leporina	1	undefined
IGA-1-13	Igapo	2018	71	2018-10-24	2019-01-03	2018-10-24	08:26:19	INSTALL	Setup	Setup	Setup	Setup	1	undefined
IGA-2-13	Igapo	2019	61	2019-10-16	2019-12-16	2019-10-27	06:04:16	MAMMAL	Frugivore.Granivore	Myoprocta	acouchy	Myoprocta_acouchy	1	undefined
IGA-2-13	Igapo	2019	61	2019-10-16	2019-12-16	2019-10-31	05:43:04	MAMMAL	Frugivore.Granivore	Myoprocta	acouchy	Myoprocta_acouchy	1	undefined
IGA-2-13	Igapo	2019	61	2019-10-16	2019-12-16	2019-11-03	18:04:28	MAMMAL	Frugivore.Granivore	Myoprocta	acouchy	Myoprocta_acouchy	1	undefined
IGA-2-13	Igapo	2019	61	2019-10-16	2019-12-16	2019-11-06	18:03:18	MAMMAL	Frugivore.Granivore	Myoprocta	acouchy	Myoprocta_acouchy	1	undefined
IGA-2-13	Igapo	2019	61	2019-10-16	2019-12-16	2019-11-17	16:53:00	MAMMAL	Insectivore	Myrmecophaga	tridactyla	Myrmecophaga_tridactyla	1	undefined
IGA-2-13	Igapo	2019	61	2019-10-16	2019-12-16	2019-12-16	14:47:37	INSTALL	Retrieval	Retrieval	Retrieval	Pickup	1	undefined
IGA-2-13	Igapo	2019	61	2019-10-16	2019-12-16	2019-10-16	09:46:19	INSTALL	Setup	Setup	Setup	Setup	1	undefined
IGA-2-13	Igapo	2019	61	2019-10-16	2019-12-16	2019-11-11	17:27:01	MAMMAL	Frugivore.Granivore	Myoprocta	acouchy	Myoprocta_acouchy	1	undefined
IGA-2-13	Igapo	2019	61	2019-10-16	2019-12-16	2019-11-13	15:06:53	MAMMAL	Frugivore.Herbivore	Dicotyles	tajacu	Dicotyles_tajacu	1	undefined
IGA-2-13	Igapo	2019	61	2019-10-16	2019-12-16	2019-12-11	14:35:36	MAMMAL	Frugivore.Granivore	Dasyprocta	leporina	Dasyprocta_leporina	1	undefined
IGA-2-13	Igapo	2019	61	2019-10-16	2019-12-16	2019-12-12	11:01:27	MAMMAL	Frugivore.Herbivore	Dicotyles	tajacu	Dicotyles_tajacu	1	undefined
IGA-2-13	Igapo	2019	61	2019-10-16	2019-12-16	2019-11-12	18:08:33	MAMMAL	Frugivore.Granivore	Myoprocta	acouchy	Myoprocta_acouchy	1	undefined
IGA-1-14	Igapo	2018	74	2018-10-23	2019-01-05	2019-01-05	10:26:34	INSTALL	Retrieval	Retrieval	Retrieval	Pickup	1	undefined
IGA-1-14	Igapo	2018	74	2018-10-23	2019-01-05	2018-12-05	06:15:09	MAMMAL	Frugivore.Granivore	Myoprocta	acouchy	Myoprocta_acouchy	1	undefined
IGA-1-14	Igapo	2018	74	2018-10-23	2019-01-05	2018-11-11	00:23:16	MAMMAL	Frugivore.Granivore	Proechimys	spp.	Proechimys_spp.	1	undefined
IGA-1-14	Igapo	2018	74	2018-10-23	2019-01-05	2018-11-04	06:00:14	MAMMAL	Frugivore.Granivore	Myoprocta	acouchy	Myoprocta_acouchy	1	undefined
IGA-1-14	Igapo	2018	74	2018-10-23	2019-01-05	2018-12-12	07:13:18	INSTALL	Setup	Setup	Setup	Setup	1	undefined
IGA-1-14	Igapo	2018	74	2018-10-23	2019-01-05	2019-01-01	07:26:31	MAMMAL	Frugivore.Omnivore	Nasua	nasua	Nasua_nasua	2	undefined
IGA-1-14	Igapo	2018	74	2018-10-23	2019-01-05	2019-01-01	12:00:27	MAMMAL	Frugivore.Omnivore	Nasua	nasua	Nasua_nasua	3	undefined
IGA-1-14	Igapo	2018	74	2018-10-23	2019-01-05	2019-01-01	13:39:31	MAMMAL	Frugivore.Omnivore	Nasua	nasua	Nasua_nasua	3	undefined
IGA-1-14	Igapo	2018	74	2018-10-23	2019-01-05	2018-12-17	04:36:07	MAMMAL	Frugivore.Granivore	Proechimys	spp.	Proechimys_spp.	1	undefined
IGA-1-14	Igapo	2018	74	2018-10-23	2019-01-05	2018-12-25	06:23:43	MAMMAL	Frugivore.Granivore	Myoprocta	acouchy	Myoprocta_acouchy	1	undefined
IGA-1-14	Igapo	2018	74	2018-10-23	2019-01-05	2018-10-23	14:46:30	INSTALL	Setup	Setup	Setup	Setup	1	undefined
IGA-2-14	Igapo	2019	61	2019-10-16	2019-12-16	2019-11-20	16:48:56	MAMMAL	Frugivore.Omnivore	Eira	barbara	Eira_barbara	1	Male
IGA-2-14	Igapo	2019	61	2019-10-16	2019-12-16	2019-11-19	12:50:28	MAMMAL	Carnivore	Panthera	onca	Panthera_onca	1	Female
IGA-2-14	Igapo	2019	61	2019-10-16	2019-12-16	2019-12-05	05:49:40	MAMMAL	Frugivore.Granivore	Dasyprocta	leporina	Dasyprocta_leporina	1	undefined
IGA-2-14	Igapo	2019	61	2019-10-16	2019-12-16	2019-10-20	06:03:58	MAMMAL	Frugivore.Granivore	Myoprocta	acouchy	Myoprocta_acouchy	1	undefined
IGA-2-14	Igapo	2019	61	2019-10-16	2019-12-16	2019-11-17	05:44:58	MAMMAL	Frugivore.Omnivore	Eira	barbara	Eira_barbara	1	Male
IGA-2-14	Igapo	2019	61	2019-10-16	2019-12-16	2019-12-16	15:21:29	INSTALL	Retrieval	Retrieval	Retrieval	Pickup	1	undefined
IGA-2-14	Igapo	2019	61	2019-10-16	2019-12-16	2019-11-15	16:27:34	MAMMAL	Frugivore.Granivore	Dasyprocta	leporina	Dasyprocta_leporina	1	undefined
IGA-2-14	Igapo	2019	61	2019-10-16	2019-12-16	2019-10-16	10:42:33	INSTALL	Setup	Setup	Setup	Setup	1	undefined
IGA-2-14	Igapo	2019	61	2019-10-16	2019-12-16	2019-12-14	15:52:49	MAMMAL	Frugivore.Herbivore	Dicotyles	tajacu	Dicotyles_tajacu	3	undefined
IGA-1-15	Igapo	2018	48	2018-10-23	2018-12-10	2018-11-06	06:40:38	MAMMAL	Carnivore	Leopardus	wiedii	Leopardus_wiedii	2	undefined
IGA-1-15	Igapo	2018	48	2018-10-23	2018-12-10	2018-12-10	12:32:26	INSTALL	Retrieval	Retrieval	Retrieval	Pickup	1	undefined
IGA-1-15	Igapo	2018	48	2018-10-23	2018-12-10	2018-10-23	13:45:07	INSTALL	Setup	Setup	Setup	Setup	1	undefined
IGA-2-15	Igapo	2019	61	2019-10-16	2019-12-16	2019-12-16	13:12:52	INSTALL	Retrieval	Retrieval	Retrieval	Pickup	1	undefined
IGA-2-15	Igapo	2019	61	2019-10-16	2019-12-16	2019-10-16	12:27:36	INSTALL	Setup	Setup	Setup	Setup	1	undefined
IGA-1-16	Igapo	2018	72	2018-10-23	2019-01-03	2018-11-08	18:53:12	MAMMAL	Frugivore.Omnivore	Didelphis	marsupialis	Didelphis_marsupialis	1	undefined
IGA-1-16	Igapo	2018	72	2018-10-23	2019-01-03	2018-11-09	06:56:24	MAMMAL	Frugivore.Granivore	Dasyprocta	leporina	Dasyprocta_leporina	1	undefined
IGA-1-16	Igapo	2018	72	2018-10-23	2019-01-03	2018-11-09	23:01:20	MAMMAL	Insectivore.Omnivore	Philander	opossum	Philander_opossum	1	undefined
IGA-1-16	Igapo	2018	72	2018-10-23	2019-01-03	2018-12-05	21:13:22	MAMMAL	Insectivore.Omnivore	Philander	opossum	Philander_opossum	1	undefined
IGA-1-16	Igapo	2018	72	2018-10-23	2019-01-03	2018-12-05	22:45:30	MAMMAL	Insectivore.Omnivore	Philander	opossum	Philander_opossum	1	undefined
IGA-1-16	Igapo	2018	72	2018-10-23	2019-01-03	2018-12-10	09:26:47	MAMMAL	Frugivore.Granivore	Dasyprocta	leporina	Dasyprocta_leporina	1	undefined
IGA-1-16	Igapo	2018	72	2018-10-23	2019-01-03	2018-11-05	08:49:43	MAMMAL	Frugivore.Granivore	Dasyprocta	leporina	Dasyprocta_leporina	1	undefined
IGA-1-16	Igapo	2018	72	2018-10-23	2019-01-03	2019-01-03	13:02:58	INSTALL	Retrieval	Retrieval	Retrieval	Pickup	1	undefined
IGA-1-16	Igapo	2018	72	2018-10-23	2019-01-03	2018-12-04	23:54:06	MAMMAL	Insectivore.Omnivore	Philander	opossum	Philander_opossum	1	undefined
IGA-1-16	Igapo	2018	72	2018-10-23	2019-01-03	2018-12-11	04:11:10	MAMMAL	Insectivore.Omnivore	Philander	opossum	Philander_opossum	1	undefined
IGA-1-16	Igapo	2018	72	2018-10-23	2019-01-03	2018-11-13	01:01:11	MAMMAL	Frugivore.Granivore	Proechimys	spp.	Proechimys_spp.	1	undefined
IGA-1-16	Igapo	2018	72	2018-10-23	2019-01-03	2018-11-13	04:31:29	MAMMAL	Frugivore.Granivore	Proechimys	spp.	Proechimys_spp.	1	undefined
IGA-1-16	Igapo	2018	72	2018-10-23	2019-01-03	2018-12-14	04:05:54	MAMMAL	Insectivore.Omnivore	Philander	opossum	Philander_opossum	1	undefined
IGA-1-16	Igapo	2018	72	2018-10-23	2019-01-03	2018-12-30	20:33:39	MAMMAL	Frugivore.Granivore	Proechimys	spp.	Proechimys_spp.	1	undefined
IGA-1-16	Igapo	2018	72	2018-10-23	2019-01-03	2018-12-15	12:38:16	MAMMAL	Carnivore	Panthera	onca	Panthera_onca	1	undefined
IGA-1-16	Igapo	2018	72	2018-10-23	2019-01-03	2018-10-31	08:02:22	MAMMAL	Frugivore.Granivore	Dasyprocta	leporina	Dasyprocta_leporina	1	undefined
IGA-1-16	Igapo	2018	72	2018-10-23	2019-01-03	2018-11-29	09:34:18	MAMMAL	Frugivore.Granivore	Dasyprocta	leporina	Dasyprocta_leporina	1	undefined
IGA-1-16	Igapo	2018	72	2018-10-23	2019-01-03	2018-11-29	19:23:33	MAMMAL	Insectivore.Omnivore	Philander	opossum	Philander_opossum	1	undefined
IGA-1-16	Igapo	2018	72	2018-10-23	2019-01-03	2018-11-29	23:16:48	MAMMAL	Insectivore.Omnivore	Philander	opossum	Philander_opossum	1	undefined
IGA-1-16	Igapo	2018	72	2018-10-23	2019-01-03	2018-12-28	20:04:00	MAMMAL	Frugivore.Granivore	Proechimys	spp.	Proechimys_spp.	1	undefined
IGA-1-16	Igapo	2018	72	2018-10-23	2019-01-03	2018-11-28	20:25:05	MAMMAL	Insectivore.Omnivore	Philander	opossum	Philander_opossum	1	undefined
IGA-1-16	Igapo	2018	72	2018-10-23	2019-01-03	2018-11-18	00:14:20	MAMMAL	Frugivore.Omnivore	Didelphis	marsupialis	Didelphis_marsupialis	1	undefined
IGA-1-16	Igapo	2018	72	2018-10-23	2019-01-03	2018-11-27	20:39:58	MAMMAL	Insectivore.Omnivore	Philander	opossum	Philander_opossum	1	undefined
IGA-1-16	Igapo	2018	72	2018-10-23	2019-01-03	2018-11-27	18:58:47	MAMMAL	Frugivore.Granivore	Proechimys	spp.	Proechimys_spp.	1	undefined
IGA-1-16	Igapo	2018	72	2018-10-23	2019-01-03	2018-10-28	19:20:38	MAMMAL	Frugivore.Herbivore	Cuniculus	paca	Cuniculus_paca	1	undefined
IGA-1-16	Igapo	2018	72	2018-10-23	2019-01-03	2018-12-26	19:02:56	MAMMAL	Frugivore.Omnivore	Didelphis	marsupialis	Didelphis_marsupialis	1	undefined
IGA-1-16	Igapo	2018	72	2018-10-23	2019-01-03	2018-12-26	21:14:37	MAMMAL	Frugivore.Omnivore	Didelphis	marsupialis	Didelphis_marsupialis	1	undefined
IGA-1-16	Igapo	2018	72	2018-10-23	2019-01-03	2018-11-19	09:51:40	MAMMAL	Frugivore.Granivore	Dasyprocta	leporina	Dasyprocta_leporina	1	undefined
IGA-1-16	Igapo	2018	72	2018-10-23	2019-01-03	2018-11-26	19:48:04	MAMMAL	Frugivore.Granivore	Proechimys	spp.	Proechimys_spp.	1	undefined
IGA-1-16	Igapo	2018	72	2018-10-23	2019-01-03	2018-11-20	03:25:48	MAMMAL	Frugivore.Granivore	Proechimys	spp.	Proechimys_spp.	1	undefined
IGA-1-16	Igapo	2018	72	2018-10-23	2019-01-03	2018-10-23	13:21:36	INSTALL	Setup	Setup	Setup	Setup	1	undefined
IGA-1-16	Igapo	2018	72	2018-10-23	2019-01-03	2018-11-22	04:43:03	MAMMAL	Frugivore.Granivore	Proechimys	spp.	Proechimys_spp.	1	undefined
IGA-1-16	Igapo	2018	72	2018-10-23	2019-01-03	2018-12-22	18:07:44	MAMMAL	Frugivore.Granivore	Dasyprocta	leporina	Dasyprocta_leporina	1	undefined
IGA-1-16	Igapo	2018	72	2018-10-23	2019-01-03	2018-12-22	02:16:09	MAMMAL	Frugivore.Granivore	Proechimys	spp.	Proechimys_spp.	1	undefined
IGA-2-16	Igapo	2019	61	2019-10-16	2019-12-16	2019-10-29	02:39:27	MAMMAL	Frugivore.Omnivore	Didelphis	marsupialis	Didelphis_marsupialis	1	undefined
IGA-2-16	Igapo	2019	61	2019-10-16	2019-12-16	2019-10-26	20:51:44	MAMMAL	Frugivore.Herbivore	Tapirus	terrestris	Tapirus_terrestris	3	Couple
IGA-2-16	Igapo	2019	61	2019-10-16	2019-12-16	2019-10-31	19:04:06	MAMMAL	Frugivore.Omnivore	Didelphis	marsupialis	Didelphis_marsupialis	1	undefined
IGA-2-16	Igapo	2019	61	2019-10-16	2019-12-16	2019-11-01	00:07:58	MAMMAL	Frugivore.Omnivore	Didelphis	marsupialis	Didelphis_marsupialis	1	undefined
IGA-2-16	Igapo	2019	61	2019-10-16	2019-12-16	2019-11-01	18:49:20	MAMMAL	Frugivore.Omnivore	Didelphis	marsupialis	Didelphis_marsupialis	1	undefined
IGA-2-16	Igapo	2019	61	2019-10-16	2019-12-16	2019-11-23	16:42:05	MAMMAL	Frugivore.Herbivore	Dicotyles	tajacu	Dicotyles_tajacu	1	undefined
IGA-2-16	Igapo	2019	61	2019-10-16	2019-12-16	2019-10-24	15:28:21	MAMMAL	Frugivore.Herbivore	Dicotyles	tajacu	Dicotyles_tajacu	1	undefined
IGA-2-16	Igapo	2019	61	2019-10-16	2019-12-16	2019-11-02	00:44:21	MAMMAL	Frugivore.Omnivore	Didelphis	marsupialis	Didelphis_marsupialis	1	undefined
IGA-2-16	Igapo	2019	61	2019-10-16	2019-12-16	2019-11-02	03:39:00	MAMMAL	Frugivore.Omnivore	Didelphis	marsupialis	Didelphis_marsupialis	1	undefined
IGA-2-16	Igapo	2019	61	2019-10-16	2019-12-16	2019-11-22	23:04:22	MAMMAL	Frugivore.Omnivore	Didelphis	marsupialis	Didelphis_marsupialis	1	undefined
IGA-2-16	Igapo	2019	61	2019-10-16	2019-12-16	2019-12-02	16:31:54	MAMMAL	Frugivore.Granivore	Dasyprocta	leporina	Dasyprocta_leporina	1	undefined
IGA-2-16	Igapo	2019	61	2019-10-16	2019-12-16	2019-12-05	17:17:16	MAMMAL	Frugivore.Granivore	Dasyprocta	leporina	Dasyprocta_leporina	1	undefined
IGA-2-16	Igapo	2019	61	2019-10-16	2019-12-16	2019-10-20	06:38:34	MAMMAL	Frugivore.Granivore	Dasyprocta	leporina	Dasyprocta_leporina	1	undefined
IGA-2-16	Igapo	2019	61	2019-10-16	2019-12-16	2019-11-06	22:39:54	MAMMAL	Frugivore.Omnivore	Didelphis	marsupialis	Didelphis_marsupialis	1	undefined
IGA-2-16	Igapo	2019	61	2019-10-16	2019-12-16	2019-11-18	13:51:46	MAMMAL	Frugivore.Herbivore	Dicotyles	tajacu	Dicotyles_tajacu	1	undefined
IGA-2-16	Igapo	2019	61	2019-10-16	2019-12-16	2019-12-06	15:57:41	MAMMAL	Frugivore.Granivore	Dasyprocta	leporina	Dasyprocta_leporina	1	undefined
IGA-2-16	Igapo	2019	61	2019-10-16	2019-12-16	2019-12-16	13:01:10	INSTALL	Retrieval	Retrieval	Retrieval	Pickup	1	undefined
IGA-2-16	Igapo	2019	61	2019-10-16	2019-12-16	2019-11-09	22:26:13	MAMMAL	Frugivore.Omnivore	Didelphis	marsupialis	Didelphis_marsupialis	1	undefined
IGA-2-16	Igapo	2019	61	2019-10-16	2019-12-16	2019-10-16	13:12:25	INSTALL	Setup	Setup	Setup	Setup	1	undefined
IGA-2-16	Igapo	2019	61	2019-10-16	2019-12-16	2019-11-11	08:09:49	MAMMAL	Frugivore.Granivore	Dasyprocta	leporina	Dasyprocta_leporina	1	undefined
IGA-2-16	Igapo	2019	61	2019-10-16	2019-12-16	2019-12-12	08:10:26	MAMMAL	Frugivore.Granivore	Dasyprocta	leporina	Dasyprocta_leporina	1	undefined
IGA-2-16	Igapo	2019	61	2019-10-16	2019-12-16	2019-11-12	18:36:47	MAMMAL	Frugivore.Omnivore	Didelphis	marsupialis	Didelphis_marsupialis	1	undefined
IGA-1-17	Igapo	2018	48	2018-10-23	2018-12-10	2018-12-07	23:55:17	MAMMAL	Frugivore.Granivore	Proechimys	spp.	Proechimys_spp.	1	undefined
IGA-1-17	Igapo	2018	48	2018-10-23	2018-12-10	2018-12-10	12:18:32	INSTALL	Retrieval	Retrieval	Retrieval	Pickup	1	undefined
IGA-1-17	Igapo	2018	48	2018-10-23	2018-12-10	2018-11-04	02:05:15	MAMMAL	Frugivore.Granivore	Proechimys	spp.	Proechimys_spp.	1	undefined
IGA-1-17	Igapo	2018	48	2018-10-23	2018-12-10	2018-11-30	03:24:17	MAMMAL	Frugivore.Omnivore	Didelphis	marsupialis	Didelphis_marsupialis	1	undefined
IGA-1-17	Igapo	2018	48	2018-10-23	2018-12-10	2018-10-26	21:40:47	MAMMAL	Frugivore.Herbivore	Tapirus	terrestris	Tapirus_terrestris	1	undefined
IGA-1-17	Igapo	2018	48	2018-10-23	2018-12-10	2018-11-24	03:51:35	MAMMAL	Frugivore.Granivore	Proechimys	spp.	Proechimys_spp.	1	undefined
IGA-1-17	Igapo	2018	48	2018-10-23	2018-12-10	2018-10-23	08:46:02	INSTALL	Setup	Setup	Setup	Setup	1	undefined
IGA-2-17	Igapo	2019	60	2019-10-17	2019-12-16	2019-10-27	17:36:35	MAMMAL	Frugivore.Herbivore	Dicotyles	tajacu	Dicotyles_tajacu	1	undefined
IGA-2-17	Igapo	2019	60	2019-10-17	2019-12-16	2019-10-27	21:25:19	MAMMAL	Frugivore.Herbivore	Dicotyles	tajacu	Dicotyles_tajacu	4	undefined
IGA-2-17	Igapo	2019	60	2019-10-17	2019-12-16	2019-11-30	07:02:08	MAMMAL	Frugivore.Granivore	Dasyprocta	leporina	Dasyprocta_leporina	1	undefined
IGA-2-17	Igapo	2019	60	2019-10-17	2019-12-16	2019-11-30	08:10:17	MAMMAL	Frugivore.Granivore	Dasyprocta	leporina	Dasyprocta_leporina	1	undefined
IGA-2-17	Igapo	2019	60	2019-10-17	2019-12-16	2019-12-04	11:26:06	MAMMAL	Frugivore.Granivore	Dasyprocta	leporina	Dasyprocta_leporina	1	undefined
IGA-2-17	Igapo	2019	60	2019-10-17	2019-12-16	2019-12-04	17:02:22	MAMMAL	Frugivore.Herbivore	Dicotyles	tajacu	Dicotyles_tajacu	1	undefined
IGA-2-17	Igapo	2019	60	2019-10-17	2019-12-16	2019-12-05	06:01:25	MAMMAL	Frugivore.Herbivore	Dicotyles	tajacu	Dicotyles_tajacu	1	undefined
IGA-2-17	Igapo	2019	60	2019-10-17	2019-12-16	2019-12-16	12:29:42	INSTALL	Retrieval	Retrieval	Retrieval	Pickup	1	undefined
IGA-2-17	Igapo	2019	60	2019-10-17	2019-12-16	2019-10-17	07:57:33	INSTALL	Setup	Setup	Setup	Setup	1	undefined
IGA-2-17	Igapo	2019	60	2019-10-17	2019-12-16	2019-12-14	06:02:54	MAMMAL	Frugivore.Granivore	Dasyprocta	leporina	Dasyprocta_leporina	1	undefined
IGA-1-18	Igapo	2018	48	2018-10-23	2018-12-10	2018-12-09	03:16:51	MAMMAL	Frugivore.Granivore	Proechimys	spp.	Proechimys_spp.	1	undefined
IGA-1-18	Igapo	2018	48	2018-10-23	2018-12-10	2018-12-10	11:44:18	INSTALL	Retrieval	Retrieval	Retrieval	Pickup	1	undefined
IGA-1-18	Igapo	2018	48	2018-10-23	2018-12-10	2018-12-04	01:12:52	MAMMAL	Frugivore.Granivore	Proechimys	spp.	Proechimys_spp.	1	undefined
IGA-1-18	Igapo	2018	48	2018-10-23	2018-12-10	2018-10-23	12:16:13	INSTALL	Setup	Setup	Setup	Setup	1	undefined
IGA-2-18	Igapo	2019	58	2019-10-17	2019-12-14	2019-10-17	08:44:50	INSTALL	Setup	Setup	Setup	Setup	1	undefined
IGA-2-18	Igapo	2019	58	2019-10-17	2019-12-14	2019-12-14	12:19:28	INSTALL	Retrieval	Retrieval	Retrieval	Pickup	1	undefined
IGA-1-19	Igapo	2018	48	2018-10-23	2018-12-10	2018-11-07	00:34:52	MAMMAL	Frugivore.Omnivore	Didelphis	marsupialis	Didelphis_marsupialis	1	undefined
IGA-1-19	Igapo	2018	48	2018-10-23	2018-12-10	2018-12-10	11:09:11	INSTALL	Retrieval	Retrieval	Retrieval	Pickup	1	undefined
IGA-1-19	Igapo	2018	48	2018-10-23	2018-12-10	2018-11-04	23:46:16	MAMMAL	Insectivore.Omnivore	Metachirus	nudicaudatus	Metachirus_nudicaudatus	1	undefined
IGA-1-19	Igapo	2018	48	2018-10-23	2018-12-10	2018-10-31	08:03:53	MAMMAL	Frugivore.Granivore	Dasyprocta	leporina	Dasyprocta_leporina	1	undefined
IGA-1-19	Igapo	2018	48	2018-10-23	2018-12-10	2018-10-23	11:36:10	INSTALL	Setup	Setup	Setup	Setup	1	undefined
IGA-2-19	Igapo	2019	58	2019-10-17	2019-12-14	2019-10-27	00:38:30	MAMMAL	Frugivore.Omnivore	Didelphis	marsupialis	Didelphis_marsupialis	1	undefined
IGA-2-19	Igapo	2019	58	2019-10-17	2019-12-14	2019-11-30	21:42:57	MAMMAL	Frugivore.Omnivore	Didelphis	marsupialis	Didelphis_marsupialis	1	undefined
IGA-2-19	Igapo	2019	58	2019-10-17	2019-12-14	2019-11-21	00:32:52	MAMMAL	Frugivore.Omnivore	Didelphis	marsupialis	Didelphis_marsupialis	1	undefined
IGA-2-19	Igapo	2019	58	2019-10-17	2019-12-14	2019-11-21	05:09:59	MAMMAL	Frugivore.Omnivore	Didelphis	marsupialis	Didelphis_marsupialis	1	undefined
IGA-2-19	Igapo	2019	58	2019-10-17	2019-12-14	2019-12-04	17:17:07	MAMMAL	Frugivore.Granivore	Dasyprocta	leporina	Dasyprocta_leporina	1	undefined
IGA-2-19	Igapo	2019	58	2019-10-17	2019-12-14	2019-11-07	01:21:04	MAMMAL	Frugivore.Omnivore	Didelphis	marsupialis	Didelphis_marsupialis	1	undefined
IGA-2-19	Igapo	2019	58	2019-10-17	2019-12-14	2019-11-07	03:45:09	MAMMAL	Frugivore.Omnivore	Didelphis	marsupialis	Didelphis_marsupialis	1	undefined
IGA-2-19	Igapo	2019	58	2019-10-17	2019-12-14	2019-12-07	17:45:28	MAMMAL	Frugivore.Granivore	Dasyprocta	leporina	Dasyprocta_leporina	1	undefined
IGA-2-19	Igapo	2019	58	2019-10-17	2019-12-14	2019-11-08	01:40:02	MAMMAL	Frugivore.Omnivore	Didelphis	marsupialis	Didelphis_marsupialis	1	undefined
IGA-2-19	Igapo	2019	58	2019-10-17	2019-12-14	2019-10-17	09:30:50	INSTALL	Setup	Setup	Setup	Setup	1	undefined
IGA-2-19	Igapo	2019	58	2019-10-17	2019-12-14	2019-12-14	11:30:19	INSTALL	Retrieval	Retrieval	Retrieval	Pickup	1	undefined
IGA-2-19	Igapo	2019	58	2019-10-17	2019-12-14	2019-11-10	16:38:32	MAMMAL	Frugivore.Omnivore	Eira	barbara	Eira_barbara	1	Male
IGA-2-19	Igapo	2019	58	2019-10-17	2019-12-14	2019-12-11	23:25:51	MAMMAL	Frugivore.Omnivore	Didelphis	marsupialis	Didelphis_marsupialis	1	undefined
IGA-2-19	Igapo	2019	58	2019-10-17	2019-12-14	2019-12-11	16:23:39	MAMMAL	Carnivore	Pteronura	brasiliensis	Pteronura_brasiliensis	1	undefined
IGA-2-19	Igapo	2019	58	2019-10-17	2019-12-14	2019-12-11	19:40:10	MAMMAL	Carnivore	Pteronura	brasiliensis	Pteronura_brasiliensis	2	undefined
IGA-2-19	Igapo	2019	58	2019-10-17	2019-12-14	2019-12-11	21:53:03	MAMMAL	Carnivore	Pteronura	brasiliensis	Pteronura_brasiliensis	2	undefined
IGA-2-19	Igapo	2019	58	2019-10-17	2019-12-14	2019-12-12	05:37:22	MAMMAL	Carnivore	Pteronura	brasiliensis	Pteronura_brasiliensis	1	undefined
IGA-2-19	Igapo	2019	58	2019-10-17	2019-12-14	2019-12-12	10:34:44	MAMMAL	Carnivore	Pteronura	brasiliensis	Pteronura_brasiliensis	1	undefined
IGA-2-19	Igapo	2019	58	2019-10-17	2019-12-14	2019-12-12	13:58:35	MAMMAL	Carnivore	Pteronura	brasiliensis	Pteronura_brasiliensis	1	undefined
IGA-1-20	Igapo	2018	74	2018-10-22	2019-01-04	2018-11-08	19:24:02	MAMMAL	Insectivore.Omnivore	Philander	opossum	Philander_opossum	1	undefined
IGA-1-20	Igapo	2018	74	2018-10-22	2019-01-04	2019-01-04	06:42:34	MAMMAL	Frugivore.Granivore	Dasyprocta	leporina	Dasyprocta_leporina	1	undefined
IGA-1-20	Igapo	2018	74	2018-10-22	2019-01-04	2019-01-04	01:54:04	MAMMAL	Frugivore.Granivore	Proechimys	spp.	Proechimys_spp.	1	undefined
IGA-1-20	Igapo	2018	74	2018-10-22	2019-01-04	2019-01-04	03:29:03	MAMMAL	Frugivore.Granivore	Proechimys	spp.	Proechimys_spp.	1	undefined
IGA-1-20	Igapo	2018	74	2018-10-22	2019-01-04	2019-01-04	09:29:52	INSTALL	Retrieval	Retrieval	Retrieval	Pickup	1	undefined
IGA-1-20	Igapo	2018	74	2018-10-22	2019-01-04	2018-11-10	07:19:55	MAMMAL	Frugivore.Herbivore	Mazama	americana	Mazama_americana	1	undefined
IGA-1-20	Igapo	2018	74	2018-10-22	2019-01-04	2018-11-05	19:38:03	MAMMAL	Frugivore.Granivore	Proechimys	spp.	Proechimys_spp.	1	undefined
IGA-1-20	Igapo	2018	74	2018-10-22	2019-01-04	2019-01-03	03:09:14	MAMMAL	Frugivore.Granivore	Proechimys	spp.	Proechimys_spp.	1	undefined
IGA-1-20	Igapo	2018	74	2018-10-22	2019-01-04	2018-12-11	01:07:54	MAMMAL	Frugivore.Herbivore	Cuniculus	paca	Cuniculus_paca	1	undefined
IGA-1-20	Igapo	2018	74	2018-10-22	2019-01-04	2018-12-12	03:41:29	MAMMAL	Insectivore.Omnivore	Philander	opossum	Philander_opossum	1	undefined
IGA-1-20	Igapo	2018	74	2018-10-22	2019-01-04	2018-12-13	03:39:16	MAMMAL	Insectivore.Omnivore	Philander	opossum	Philander_opossum	1	undefined
IGA-1-20	Igapo	2018	74	2018-10-22	2019-01-04	2018-12-31	02:28:08	MAMMAL	Insectivore.Omnivore	Philander	opossum	Philander_opossum	1	undefined
IGA-1-20	Igapo	2018	74	2018-10-22	2019-01-04	2018-11-01	00:58:41	MAMMAL	Frugivore.Granivore	Proechimys	spp.	Proechimys_spp.	1	undefined
IGA-1-20	Igapo	2018	74	2018-10-22	2019-01-04	2018-12-30	17:05:18	MAMMAL	Frugivore.Granivore	Dasyprocta	leporina	Dasyprocta_leporina	1	undefined
IGA-1-20	Igapo	2018	74	2018-10-22	2019-01-04	2018-12-30	23:45:34	MAMMAL	Frugivore.Granivore	Proechimys	spp.	Proechimys_spp.	1	undefined
IGA-1-20	Igapo	2018	74	2018-10-22	2019-01-04	2018-10-31	04:10:22	MAMMAL	Frugivore.Herbivore	Mazama	americana	Mazama_americana	1	undefined
IGA-1-20	Igapo	2018	74	2018-10-22	2019-01-04	2018-12-16	16:39:06	MAMMAL	Frugivore.Granivore	Dasyprocta	leporina	Dasyprocta_leporina	1	undefined
IGA-1-20	Igapo	2018	74	2018-10-22	2019-01-04	2018-12-16	06:07:34	MAMMAL	Frugivore.Granivore	Myoprocta	acouchy	Myoprocta_acouchy	1	undefined
IGA-1-20	Igapo	2018	74	2018-10-22	2019-01-04	2018-10-30	05:14:32	MAMMAL	Frugivore.Granivore	Proechimys	spp.	Proechimys_spp.	1	undefined
IGA-1-20	Igapo	2018	74	2018-10-22	2019-01-04	2018-12-28	08:12:45	MAMMAL	Frugivore.Granivore	Dasyprocta	leporina	Dasyprocta_leporina	1	undefined
IGA-1-20	Igapo	2018	74	2018-10-22	2019-01-04	2018-12-17	06:49:05	MAMMAL	Frugivore.Granivore	Dasyprocta	leporina	Dasyprocta_leporina	1	undefined
IGA-1-20	Igapo	2018	74	2018-10-22	2019-01-04	2018-12-17	05:21:40	MAMMAL	Frugivore.Granivore	Proechimys	spp.	Proechimys_spp.	1	undefined
IGA-1-20	Igapo	2018	74	2018-10-22	2019-01-04	2018-12-27	08:25:51	MAMMAL	Frugivore.Granivore	Dasyprocta	leporina	Dasyprocta_leporina	1	undefined
IGA-1-20	Igapo	2018	74	2018-10-22	2019-01-04	2018-11-18	08:49:24	MAMMAL	Frugivore.Herbivore	Mazama	americana	Mazama_americana	1	undefined
IGA-1-20	Igapo	2018	74	2018-10-22	2019-01-04	2018-12-18	05:36:41	MAMMAL	Frugivore.Granivore	Myoprocta	acouchy	Myoprocta_acouchy	1	undefined
IGA-1-20	Igapo	2018	74	2018-10-22	2019-01-04	2018-11-19	02:58:26	MAMMAL	Frugivore.Granivore	Proechimys	spp.	Proechimys_spp.	1	undefined
IGA-1-20	Igapo	2018	74	2018-10-22	2019-01-04	2018-12-19	10:35:47	MAMMAL	Frugivore.Granivore	Dasyprocta	leporina	Dasyprocta_leporina	1	undefined
IGA-1-20	Igapo	2018	74	2018-10-22	2019-01-04	2018-12-19	19:58:51	MAMMAL	Frugivore.Granivore	Proechimys	spp.	Proechimys_spp.	1	undefined
IGA-1-20	Igapo	2018	74	2018-10-22	2019-01-04	2018-12-25	20:27:13	MAMMAL	Frugivore.Granivore	Proechimys	spp.	Proechimys_spp.	1	undefined
IGA-1-20	Igapo	2018	74	2018-10-22	2019-01-04	2018-12-25	21:56:14	MAMMAL	Frugivore.Granivore	Proechimys	spp.	Proechimys_spp.	1	undefined
IGA-1-20	Igapo	2018	74	2018-10-22	2019-01-04	2018-11-20	21:02:15	MAMMAL	Frugivore.Granivore	Proechimys	spp.	Proechimys_spp.	1	undefined
IGA-1-20	Igapo	2018	74	2018-10-22	2019-01-04	2018-11-20	22:12:30	MAMMAL	Frugivore.Granivore	Proechimys	spp.	Proechimys_spp.	1	undefined
IGA-1-20	Igapo	2018	74	2018-10-22	2019-01-04	2018-11-25	16:39:13	MAMMAL	Frugivore.Herbivore	Mazama	americana	Mazama_americana	1	undefined
IGA-1-20	Igapo	2018	74	2018-10-22	2019-01-04	2018-12-20	18:07:28	MAMMAL	Frugivore.Granivore	Myoprocta	acouchy	Myoprocta_acouchy	1	undefined
IGA-1-20	Igapo	2018	74	2018-10-22	2019-01-04	2018-12-20	03:03:00	MAMMAL	Frugivore.Granivore	Proechimys	spp.	Proechimys_spp.	1	undefined
IGA-1-20	Igapo	2018	74	2018-10-22	2019-01-04	2018-10-22	11:45:45	INSTALL	Setup	Setup	Setup	Setup	1	undefined
IGA-1-20	Igapo	2018	74	2018-10-22	2019-01-04	2018-10-22	22:12:02	MAMMAL	Frugivore.Granivore	Proechimys	spp.	Proechimys_spp.	1	undefined
IGA-1-20	Igapo	2018	74	2018-10-22	2019-01-04	2018-12-24	00:31:17	MAMMAL	Frugivore.Granivore	Proechimys	spp.	Proechimys_spp.	1	undefined
IGA-1-20	Igapo	2018	74	2018-10-22	2019-01-04	2018-11-21	05:17:04	MAMMAL	Frugivore.Granivore	Proechimys	spp.	Proechimys_spp.	1	undefined
IGA-1-20	Igapo	2018	74	2018-10-22	2019-01-04	2018-12-21	05:37:52	MAMMAL	Frugivore.Granivore	Myoprocta	acouchy	Myoprocta_acouchy	1	undefined
IGA-1-20	Igapo	2018	74	2018-10-22	2019-01-04	2018-12-21	16:57:14	MAMMAL	Frugivore.Granivore	Myoprocta	acouchy	Myoprocta_acouchy	1	undefined
IGA-1-20	Igapo	2018	74	2018-10-22	2019-01-04	2018-12-23	22:46:25	MAMMAL	Frugivore.Granivore	Proechimys	spp.	Proechimys_spp.	1	undefined
IGA-1-20	Igapo	2018	74	2018-10-22	2019-01-04	2018-11-23	20:50:22	MAMMAL	Frugivore.Granivore	Proechimys	spp.	Proechimys_spp.	1	undefined
IGA-2-20	Igapo	2019	58	2019-10-17	2019-12-14	2019-10-29	17:34:43	MAMMAL	Frugivore.Herbivore	Dicotyles	tajacu	Dicotyles_tajacu	1	undefined
IGA-2-20	Igapo	2019	58	2019-10-17	2019-12-14	2019-11-28	17:43:25	MAMMAL	Frugivore.Granivore	Dasyprocta	leporina	Dasyprocta_leporina	2	undefined
IGA-2-20	Igapo	2019	58	2019-10-17	2019-12-14	2019-10-25	08:49:52	MAMMAL	Carnivore	Puma	concolor	Puma_concolor	1	undefined
IGA-2-20	Igapo	2019	58	2019-10-17	2019-12-14	2019-11-23	06:09:15	MAMMAL	Frugivore.Herbivore	Dicotyles	tajacu	Dicotyles_tajacu	3	undefined
IGA-2-20	Igapo	2019	58	2019-10-17	2019-12-14	2019-11-22	14:46:23	MAMMAL	Frugivore.Herbivore	Dicotyles	tajacu	Dicotyles_tajacu	3	undefined
IGA-2-20	Igapo	2019	58	2019-10-17	2019-12-14	2019-11-04	17:07:28	MAMMAL	Frugivore.Herbivore	Dicotyles	tajacu	Dicotyles_tajacu	1	undefined
IGA-2-20	Igapo	2019	58	2019-10-17	2019-12-14	2019-10-21	07:02:04	MAMMAL	Frugivore.Granivore	Dasyprocta	leporina	Dasyprocta_leporina	1	undefined
IGA-2-20	Igapo	2019	58	2019-10-17	2019-12-14	2019-11-19	07:20:24	MAMMAL	Frugivore.Granivore	Dasyprocta	leporina	Dasyprocta_leporina	1	undefined
IGA-2-20	Igapo	2019	58	2019-10-17	2019-12-14	2019-11-19	14:22:43	MAMMAL	Frugivore.Herbivore	Dicotyles	tajacu	Dicotyles_tajacu	6	undefined
IGA-2-20	Igapo	2019	58	2019-10-17	2019-12-14	2019-10-17	13:47:46	INSTALL	Setup	Setup	Setup	Setup	1	undefined
IGA-2-20	Igapo	2019	58	2019-10-17	2019-12-14	2019-12-09	15:26:29	MAMMAL	Frugivore.Granivore	Dasyprocta	leporina	Dasyprocta_leporina	1	undefined
IGA-2-20	Igapo	2019	58	2019-10-17	2019-12-14	2019-12-14	09:23:33	INSTALL	Retrieval	Retrieval	Retrieval	Pickup	1	undefined
IGA-2-20	Igapo	2019	58	2019-10-17	2019-12-14	2019-11-13	15:45:29	MAMMAL	Frugivore.Herbivore	Dicotyles	tajacu	Dicotyles_tajacu	1	undefined
IGA-2-20	Igapo	2019	58	2019-10-17	2019-12-14	2019-12-11	13:00:08	MAMMAL	Frugivore.Granivore	Dasyprocta	leporina	Dasyprocta_leporina	1	undefined
IGA-2-20	Igapo	2019	58	2019-10-17	2019-12-14	2019-12-12	00:42:38	MAMMAL	Frugivore.Omnivore	Didelphis	marsupialis	Didelphis_marsupialis	1	undefined
IGA-1-21	Igapo	2018	49	2018-10-22	2018-12-10	2018-12-06	07:21:14	MAMMAL	Frugivore.Granivore	Dasyprocta	leporina	Dasyprocta_leporina	1	undefined
IGA-1-21	Igapo	2018	49	2018-10-22	2018-12-10	2018-12-10	09:52:15	INSTALL	Retrieval	Retrieval	Retrieval	Pickup	1	undefined
IGA-1-21	Igapo	2018	49	2018-10-22	2018-12-10	2018-11-30	19:33:57	MAMMAL	Frugivore.Granivore	Proechimys	spp.	Proechimys_spp.	1	undefined
IGA-1-21	Igapo	2018	49	2018-10-22	2018-12-10	2018-10-22	10:43:55	INSTALL	Setup	Setup	Setup	Setup	1	undefined
IGA-1-21	Igapo	2018	49	2018-10-22	2018-12-10	2018-11-23	04:52:54	MAMMAL	Insectivore.Omnivore	Philander	opossum	Philander_opossum	1	undefined
IGA-2-21	Igapo	2019	58	2019-10-17	2019-12-14	2019-11-25	04:22:09	MAMMAL	Frugivore.Granivore	Proechimys	spp.	Proechimys_spp.	1	undefined
IGA-2-21	Igapo	2019	58	2019-10-17	2019-12-14	2019-10-17	12:16:29	INSTALL	Setup	Setup	Setup	Setup	1	undefined
IGA-2-21	Igapo	2019	58	2019-10-17	2019-12-14	2019-12-14	08:49:16	INSTALL	Retrieval	Retrieval	Retrieval	Pickup	1	undefined
IGA-1-22	Igapo	2018	49	2018-10-22	2018-12-10	2018-12-10	09:17:34	INSTALL	Retrieval	Retrieval	Retrieval	Pickup	1	undefined
IGA-1-22	Igapo	2018	49	2018-10-22	2018-12-10	2018-11-29	06:25:20	MAMMAL	Frugivore.Granivore	Dasyprocta	leporina	Dasyprocta_leporina	1	undefined
IGA-1-22	Igapo	2018	49	2018-10-22	2018-12-10	2018-10-28	23:13:35	MAMMAL	Insectivore.Omnivore	Philander	opossum	Philander_opossum	1	undefined
IGA-1-22	Igapo	2018	49	2018-10-22	2018-12-10	2018-10-22	09:25:50	INSTALL	Setup	Setup	Setup	Setup	1	undefined
IGA-2-22	Igapo	2019	58	2019-10-17	2019-12-14	2019-10-17	10:34:28	INSTALL	Setup	Setup	Setup	Setup	1	undefined
IGA-2-22	Igapo	2019	58	2019-10-17	2019-12-14	2019-12-14	08:21:51	INSTALL	Retrieval	Retrieval	Retrieval	Pickup	1	undefined
IGA-1-23	Igapo	2018	72	2018-10-23	2019-01-03	2018-12-07	01:33:42	MAMMAL	Frugivore.Omnivore	Didelphis	marsupialis	Didelphis_marsupialis	1	undefined
IGA-1-23	Igapo	2018	72	2018-10-23	2019-01-03	2018-12-07	04:02:33	MAMMAL	Frugivore.Omnivore	Didelphis	marsupialis	Didelphis_marsupialis	1	undefined
IGA-1-23	Igapo	2018	72	2018-10-23	2019-01-03	2018-12-06	01:20:17	MAMMAL	Frugivore.Herbivore	Cuniculus	paca	Cuniculus_paca	1	undefined
IGA-1-23	Igapo	2018	72	2018-10-23	2019-01-03	2019-01-03	12:35:42	INSTALL	Retrieval	Retrieval	Retrieval	Pickup	1	undefined
IGA-1-23	Igapo	2018	72	2018-10-23	2019-01-03	2018-12-04	17:22:39	MAMMAL	Frugivore.Granivore	Dasyprocta	leporina	Dasyprocta_leporina	1	undefined
IGA-1-23	Igapo	2018	72	2018-10-23	2019-01-03	2019-01-02	21:21:01	MAMMAL	Insectivore.Omnivore	Philander	opossum	Philander_opossum	1	undefined
IGA-1-23	Igapo	2018	72	2018-10-23	2019-01-03	2018-11-12	16:18:25	MAMMAL	Frugivore.Granivore	Dasyprocta	leporina	Dasyprocta_leporina	1	undefined
IGA-1-23	Igapo	2018	72	2018-10-23	2019-01-03	2018-12-12	16:00:40	MAMMAL	Frugivore.Granivore	Dasyprocta	leporina	Dasyprocta_leporina	1	undefined
IGA-1-23	Igapo	2018	72	2018-10-23	2019-01-03	2018-11-03	00:31:27	MAMMAL	Frugivore.Granivore	Proechimys	spp.	Proechimys_spp.	1	undefined
IGA-1-23	Igapo	2018	72	2018-10-23	2019-01-03	2019-01-01	01:41:13	MAMMAL	Frugivore.Omnivore	Didelphis	marsupialis	Didelphis_marsupialis	1	undefined
IGA-1-23	Igapo	2018	72	2018-10-23	2019-01-03	2018-11-13	17:26:17	MAMMAL	Frugivore.Granivore	Dasyprocta	leporina	Dasyprocta_leporina	1	undefined
IGA-1-23	Igapo	2018	72	2018-10-23	2019-01-03	2018-12-13	22:16:48	MAMMAL	Frugivore.Omnivore	Didelphis	marsupialis	Didelphis_marsupialis	1	undefined
IGA-1-23	Igapo	2018	72	2018-10-23	2019-01-03	2018-12-31	01:10:17	MAMMAL	Frugivore.Herbivore	Cuniculus	paca	Cuniculus_paca	1	undefined
IGA-1-23	Igapo	2018	72	2018-10-23	2019-01-03	2018-11-28	13:05:21	MAMMAL	Frugivore.Granivore	Dasyprocta	leporina	Dasyprocta_leporina	1	undefined
IGA-1-23	Igapo	2018	72	2018-10-23	2019-01-03	2018-12-17	16:39:08	MAMMAL	Frugivore.Granivore	Dasyprocta	leporina	Dasyprocta_leporina	1	undefined
IGA-1-23	Igapo	2018	72	2018-10-23	2019-01-03	2018-10-23	11:03:34	INSTALL	Setup	Setup	Setup	Setup	1	undefined
IGA-2-23	Igapo	2019	33	2019-10-19	2019-11-21	2019-10-28	09:04:59	MAMMAL	Frugivore.Granivore	Dasyprocta	leporina	Dasyprocta_leporina	1	undefined
IGA-2-23	Igapo	2019	33	2019-10-19	2019-11-21	2019-11-01	12:47:27	MAMMAL	Frugivore.Granivore	Dasyprocta	leporina	Dasyprocta_leporina	1	undefined
IGA-2-23	Igapo	2019	33	2019-10-19	2019-11-21	2019-11-21	15:52:18	MAMMAL	Frugivore.Granivore	Dasyprocta	leporina	Dasyprocta_leporina	1	undefined
IGA-2-23	Igapo	2019	33	2019-10-19	2019-11-21	2019-11-18	03:56:59	MAMMAL	Frugivore.Omnivore	Didelphis	marsupialis	Didelphis_marsupialis	1	undefined
IGA-2-23	Igapo	2019	33	2019-10-19	2019-11-21	2019-10-19	15:33:47	INSTALL	Setup	Setup	Setup	Setup	1	undefined
IGA-2-23	Igapo	2019	33	2019-10-19	2019-11-21	2019-11-17	11:01:32	MAMMAL	Frugivore.Granivore	Dasyprocta	leporina	Dasyprocta_leporina	1	undefined
IGA-2-23	Igapo	2019	33	2019-10-19	2019-11-21	2019-11-16	14:23:54	MAMMAL	Frugivore.Granivore	Dasyprocta	leporina	Dasyprocta_leporina	1	undefined
IGA-2-23	Igapo	2019	33	2019-10-19	2019-11-21	2019-11-09	03:58:47	MAMMAL	Insectivore.Omnivore	Philander	opossum	Philander_opossum	1	undefined
IGA-1-24	Igapo	2018	73	2018-10-23	2019-01-04	2018-12-07	18:29:57	MAMMAL	Frugivore.Omnivore	Didelphis	marsupialis	Didelphis_marsupialis	1	undefined
IGA-1-24	Igapo	2018	73	2018-10-23	2019-01-04	2018-12-07	21:05:57	MAMMAL	Frugivore.Omnivore	Didelphis	marsupialis	Didelphis_marsupialis	1	undefined
IGA-1-24	Igapo	2018	73	2018-10-23	2019-01-04	2018-11-09	03:23:03	MAMMAL	Insectivore.Omnivore	Dasypus	spp.	Dasypus_spp.	1	undefined
IGA-1-24	Igapo	2018	73	2018-10-23	2019-01-04	2018-11-09	00:08:18	MAMMAL	Frugivore.Granivore	Proechimys	spp.	Proechimys_spp.	1	undefined
IGA-1-24	Igapo	2018	73	2018-10-23	2019-01-04	2019-01-04	10:12:57	INSTALL	Retrieval	Retrieval	Retrieval	Pickup	1	undefined
IGA-1-24	Igapo	2018	73	2018-10-23	2019-01-04	2018-12-05	19:44:33	MAMMAL	Frugivore.Omnivore	Didelphis	marsupialis	Didelphis_marsupialis	1	undefined
IGA-1-24	Igapo	2018	73	2018-10-23	2019-01-04	2018-12-04	19:58:19	MAMMAL	Insectivore.Omnivore	Philander	opossum	Philander_opossum	1	undefined
IGA-1-24	Igapo	2018	73	2018-10-23	2019-01-04	2018-11-03	22:51:39	MAMMAL	Insectivore.Omnivore	Philander	opossum	Philander_opossum	1	undefined
IGA-1-24	Igapo	2018	73	2018-10-23	2019-01-04	2018-12-02	23:09:12	MAMMAL	Frugivore.Omnivore	Didelphis	marsupialis	Didelphis_marsupialis	1	undefined
IGA-1-24	Igapo	2018	73	2018-10-23	2019-01-04	2018-12-13	18:44:13	MAMMAL	Carnivore	Leopardus	pardalis	Leopardus_pardalis	1	undefined
IGA-1-24	Igapo	2018	73	2018-10-23	2019-01-04	2018-12-01	22:06:12	MAMMAL	Frugivore.Omnivore	Didelphis	marsupialis	Didelphis_marsupialis	1	undefined
IGA-1-24	Igapo	2018	73	2018-10-23	2019-01-04	2018-11-16	17:02:37	MAMMAL	Frugivore.Granivore	Dasyprocta	leporina	Dasyprocta_leporina	1	undefined
IGA-1-24	Igapo	2018	73	2018-10-23	2019-01-04	2018-11-16	20:11:59	MAMMAL	Frugivore.Omnivore	Didelphis	marsupialis	Didelphis_marsupialis	1	undefined
IGA-1-24	Igapo	2018	73	2018-10-23	2019-01-04	2018-11-28	22:37:35	MAMMAL	Frugivore.Granivore	Proechimys	spp.	Proechimys_spp.	1	undefined
IGA-1-24	Igapo	2018	73	2018-10-23	2019-01-04	2018-12-25	17:13:45	MAMMAL	Frugivore.Granivore	Dasyprocta	leporina	Dasyprocta_leporina	1	undefined
IGA-1-24	Igapo	2018	73	2018-10-23	2019-01-04	2018-10-23	10:27:56	INSTALL	Setup	Setup	Setup	Setup	1	undefined
IGA-1-24	Igapo	2018	73	2018-10-23	2019-01-04	2018-11-22	05:36:10	MAMMAL	Frugivore.Granivore	Dasyprocta	leporina	Dasyprocta_leporina	1	undefined
IGA-2-24	Igapo	2019	58	2019-10-19	2019-12-16	2019-11-27	17:22:51	MAMMAL	Frugivore.Granivore	Dasyprocta	leporina	Dasyprocta_leporina	1	undefined
IGA-2-24	Igapo	2019	58	2019-10-19	2019-12-16	2019-10-28	21:28:58	MAMMAL	Frugivore.Omnivore	Didelphis	marsupialis	Didelphis_marsupialis	1	undefined
IGA-2-24	Igapo	2019	58	2019-10-19	2019-12-16	2019-11-26	05:53:21	MAMMAL	Frugivore.Granivore	Dasyprocta	leporina	Dasyprocta_leporina	1	undefined
IGA-2-24	Igapo	2019	58	2019-10-19	2019-12-16	2019-11-26	17:21:22	MAMMAL	Frugivore.Granivore	Dasyprocta	leporina	Dasyprocta_leporina	1	undefined
IGA-2-24	Igapo	2019	58	2019-10-19	2019-12-16	2019-10-27	03:34:38	MAMMAL	Frugivore.Omnivore	Didelphis	marsupialis	Didelphis_marsupialis	1	undefined
IGA-2-24	Igapo	2019	58	2019-10-19	2019-12-16	2019-10-26	05:34:28	MAMMAL	Frugivore.Granivore	Dasyprocta	leporina	Dasyprocta_leporina	1	undefined
IGA-2-24	Igapo	2019	58	2019-10-19	2019-12-16	2019-10-26	16:18:40	MAMMAL	Frugivore.Granivore	Dasyprocta	leporina	Dasyprocta_leporina	1	undefined
IGA-2-24	Igapo	2019	58	2019-10-19	2019-12-16	2019-10-26	17:34:10	MAMMAL	Frugivore.Granivore	Dasyprocta	leporina	Dasyprocta_leporina	1	undefined
IGA-2-24	Igapo	2019	58	2019-10-19	2019-12-16	2019-10-26	03:24:00	MAMMAL	Frugivore.Omnivore	Didelphis	marsupialis	Didelphis_marsupialis	1	undefined
IGA-2-24	Igapo	2019	58	2019-10-19	2019-12-16	2019-10-31	22:08:41	MAMMAL	Frugivore.Omnivore	Didelphis	marsupialis	Didelphis_marsupialis	1	undefined
IGA-2-24	Igapo	2019	58	2019-10-19	2019-12-16	2019-11-24	14:43:37	MAMMAL	Frugivore.Granivore	Dasyprocta	leporina	Dasyprocta_leporina	1	undefined
IGA-2-24	Igapo	2019	58	2019-10-19	2019-12-16	2019-10-25	16:10:24	MAMMAL	Frugivore.Granivore	Dasyprocta	leporina	Dasyprocta_leporina	1	undefined
IGA-2-24	Igapo	2019	58	2019-10-19	2019-12-16	2019-10-25	01:37:00	MAMMAL	Frugivore.Omnivore	Didelphis	marsupialis	Didelphis_marsupialis	1	undefined
IGA-2-24	Igapo	2019	58	2019-10-19	2019-12-16	2019-10-25	05:05:55	MAMMAL	Frugivore.Omnivore	Didelphis	marsupialis	Didelphis_marsupialis	1	undefined
IGA-2-24	Igapo	2019	58	2019-10-19	2019-12-16	2019-10-24	21:54:48	MAMMAL	Frugivore.Herbivore	Mazama	americana	Mazama_americana	1	Female
IGA-2-24	Igapo	2019	58	2019-10-19	2019-12-16	2019-11-22	06:27:32	MAMMAL	Frugivore.Granivore	Dasyprocta	leporina	Dasyprocta_leporina	1	undefined
IGA-2-24	Igapo	2019	58	2019-10-19	2019-12-16	2019-10-23	07:19:20	MAMMAL	Frugivore.Granivore	Dasyprocta	leporina	Dasyprocta_leporina	1	undefined
IGA-2-24	Igapo	2019	58	2019-10-19	2019-12-16	2019-11-03	02:58:40	MAMMAL	Frugivore.Omnivore	Didelphis	marsupialis	Didelphis_marsupialis	1	undefined
IGA-2-24	Igapo	2019	58	2019-10-19	2019-12-16	2019-12-03	15:28:27	MAMMAL	Frugivore.Granivore	Dasyprocta	leporina	Dasyprocta_leporina	1	undefined
IGA-2-24	Igapo	2019	58	2019-10-19	2019-12-16	2019-11-04	17:41:51	MAMMAL	Frugivore.Granivore	Dasyprocta	leporina	Dasyprocta_leporina	1	undefined
IGA-2-24	Igapo	2019	58	2019-10-19	2019-12-16	2019-12-04	06:43:44	MAMMAL	Frugivore.Granivore	Dasyprocta	leporina	Dasyprocta_leporina	1	undefined
IGA-2-24	Igapo	2019	58	2019-10-19	2019-12-16	2019-12-04	09:14:45	MAMMAL	Frugivore.Granivore	Dasyprocta	leporina	Dasyprocta_leporina	1	undefined
IGA-2-24	Igapo	2019	58	2019-10-19	2019-12-16	2019-10-21	05:49:31	MAMMAL	Frugivore.Granivore	Dasyprocta	leporina	Dasyprocta_leporina	1	undefined
IGA-2-24	Igapo	2019	58	2019-10-19	2019-12-16	2019-11-05	08:01:24	MAMMAL	Frugivore.Granivore	Dasyprocta	leporina	Dasyprocta_leporina	1	undefined
IGA-2-24	Igapo	2019	58	2019-10-19	2019-12-16	2019-11-05	16:21:39	MAMMAL	Frugivore.Granivore	Dasyprocta	leporina	Dasyprocta_leporina	1	undefined
IGA-2-24	Igapo	2019	58	2019-10-19	2019-12-16	2019-12-05	05:40:43	MAMMAL	Frugivore.Herbivore	Mazama	nemorivaga	Mazama_nemorivaga	1	Male
IGA-2-24	Igapo	2019	58	2019-10-19	2019-12-16	2019-11-06	16:42:56	MAMMAL	Frugivore.Granivore	Dasyprocta	leporina	Dasyprocta_leporina	1	undefined
IGA-2-24	Igapo	2019	58	2019-10-19	2019-12-16	2019-12-06	17:01:14	MAMMAL	Frugivore.Granivore	Dasyprocta	leporina	Dasyprocta_leporina	1	undefined
IGA-2-24	Igapo	2019	58	2019-10-19	2019-12-16	2019-10-19	13:42:38	INSTALL	Setup	Setup	Setup	Setup	1	undefined
IGA-2-24	Igapo	2019	58	2019-10-19	2019-12-16	2019-12-16	11:38:22	INSTALL	Retrieval	Retrieval	Retrieval	Pickup	1	undefined
IGA-2-24	Igapo	2019	58	2019-10-19	2019-12-16	2019-12-15	06:07:59	MAMMAL	Frugivore.Granivore	Dasyprocta	leporina	Dasyprocta_leporina	1	undefined
IGA-2-24	Igapo	2019	58	2019-10-19	2019-12-16	2019-11-15	00:49:29	MAMMAL	Frugivore.Omnivore	Didelphis	marsupialis	Didelphis_marsupialis	1	undefined
IGA-2-24	Igapo	2019	58	2019-10-19	2019-12-16	2019-11-15	21:20:13	MAMMAL	Frugivore.Omnivore	Didelphis	marsupialis	Didelphis_marsupialis	1	undefined
IGA-2-24	Igapo	2019	58	2019-10-19	2019-12-16	2019-12-14	17:36:19	MAMMAL	Frugivore.Granivore	Dasyprocta	leporina	Dasyprocta_leporina	1	undefined
IGA-2-24	Igapo	2019	58	2019-10-19	2019-12-16	2019-11-10	06:29:46	MAMMAL	Frugivore.Granivore	Dasyprocta	leporina	Dasyprocta_leporina	1	undefined
IGA-2-24	Igapo	2019	58	2019-10-19	2019-12-16	2019-11-14	17:49:18	MAMMAL	Frugivore.Granivore	Dasyprocta	leporina	Dasyprocta_leporina	1	undefined
IGA-2-24	Igapo	2019	58	2019-10-19	2019-12-16	2019-11-14	00:52:45	MAMMAL	Frugivore.Omnivore	Didelphis	marsupialis	Didelphis_marsupialis	1	undefined
IGA-2-24	Igapo	2019	58	2019-10-19	2019-12-16	2019-12-13	06:11:07	MAMMAL	Frugivore.Granivore	Dasyprocta	leporina	Dasyprocta_leporina	1	undefined
IGA-2-24	Igapo	2019	58	2019-10-19	2019-12-16	2019-11-13	19:34:24	MAMMAL	Frugivore.Omnivore	Didelphis	marsupialis	Didelphis_marsupialis	1	undefined
IGA-2-24	Igapo	2019	58	2019-10-19	2019-12-16	2019-11-13	21:45:14	MAMMAL	Frugivore.Omnivore	Didelphis	marsupialis	Didelphis_marsupialis	1	undefined
IGA-2-24	Igapo	2019	58	2019-10-19	2019-12-16	2019-11-12	05:32:34	MAMMAL	Frugivore.Granivore	Dasyprocta	leporina	Dasyprocta_leporina	1	undefined
IGA-2-24	Igapo	2019	58	2019-10-19	2019-12-16	2019-11-12	13:48:11	MAMMAL	Frugivore.Granivore	Dasyprocta	leporina	Dasyprocta_leporina	1	undefined
IGA-1-25	Igapo	2018	6	2018-10-22	2018-10-28	2018-10-28	22:19:16	MAMMAL	Frugivore.Omnivore	Didelphis	marsupialis	Didelphis_marsupialis	1	undefined
IGA-1-25	Igapo	2018	6	2018-10-22	2018-10-28	2018-10-27	07:01:40	MAMMAL	Frugivore.Granivore	Dasyprocta	leporina	Dasyprocta_leporina	1	undefined
IGA-1-25	Igapo	2018	6	2018-10-22	2018-10-28	2018-10-22	15:32:32	INSTALL	Setup	Setup	Setup	Setup	1	undefined
IGA-1-25	Igapo	2018	6	2018-10-22	2018-10-28	2018-10-26	02:41:26	MAMMAL	Frugivore.Omnivore	Didelphis	marsupialis	Didelphis_marsupialis	1	undefined
IGA-2-25	Igapo	2019	58	2019-10-19	2019-12-16	2019-11-26	07:52:07	MAMMAL	Frugivore.Granivore	Dasyprocta	leporina	Dasyprocta_leporina	1	undefined
IGA-2-25	Igapo	2019	58	2019-10-19	2019-12-16	2019-11-26	04:51:44	MAMMAL	Frugivore.Omnivore	Didelphis	marsupialis	Didelphis_marsupialis	1	undefined
IGA-2-25	Igapo	2019	58	2019-10-19	2019-12-16	2019-11-26	06:08:20	MAMMAL	Frugivore.Omnivore	Eira	barbara	Eira_barbara	2	undefined
IGA-2-25	Igapo	2019	58	2019-10-19	2019-12-16	2019-11-26	09:11:46	MAMMAL	Frugivore.Omnivore	Eira	barbara	Eira_barbara	2	undefined
IGA-2-25	Igapo	2019	58	2019-10-19	2019-12-16	2019-11-26	10:39:06	MAMMAL	Frugivore.Omnivore	Eira	barbara	Eira_barbara	2	undefined
IGA-2-25	Igapo	2019	58	2019-10-19	2019-12-16	2019-11-28	17:44:08	MAMMAL	Frugivore.Herbivore	Mazama	nemorivaga	Mazama_nemorivaga	1	Female
IGA-2-25	Igapo	2019	58	2019-10-19	2019-12-16	2019-10-26	10:00:56	MAMMAL	Frugivore.Omnivore	Nasua	nasua	Nasua_nasua	3	undefined
IGA-2-25	Igapo	2019	58	2019-10-19	2019-12-16	2019-11-24	13:27:46	MAMMAL	Frugivore.Omnivore	Eira	barbara	Eira_barbara	1	Female
IGA-2-25	Igapo	2019	58	2019-10-19	2019-12-16	2019-11-24	15:51:30	MAMMAL	Frugivore.Omnivore	Eira	barbara	Eira_barbara	1	Female
IGA-2-25	Igapo	2019	58	2019-10-19	2019-12-16	2019-10-25	16:16:53	MAMMAL	Frugivore.Granivore	Myoprocta	acouchy	Myoprocta_acouchy	1	undefined
IGA-2-25	Igapo	2019	58	2019-10-19	2019-12-16	2019-11-23	06:41:55	MAMMAL	Frugivore.Granivore	Myoprocta	acouchy	Myoprocta_acouchy	1	undefined
IGA-2-25	Igapo	2019	58	2019-10-19	2019-12-16	2019-12-01	11:48:10	MAMMAL	Frugivore.Omnivore	Eira	barbara	Eira_barbara	1	undefined
IGA-2-25	Igapo	2019	58	2019-10-19	2019-12-16	2019-12-01	08:47:55	MAMMAL	Frugivore.Granivore	Myoprocta	acouchy	Myoprocta_acouchy	1	undefined
IGA-2-25	Igapo	2019	58	2019-10-19	2019-12-16	2019-11-22	17:10:22	MAMMAL	Frugivore.Granivore	Myoprocta	acouchy	Myoprocta_acouchy	1	undefined
IGA-2-25	Igapo	2019	58	2019-10-19	2019-12-16	2019-11-20	06:10:05	MAMMAL	Frugivore.Omnivore	Eira	barbara	Eira_barbara	2	undefined
IGA-2-25	Igapo	2019	58	2019-10-19	2019-12-16	2019-11-20	15:36:00	MAMMAL	Frugivore.Omnivore	Eira	barbara	Eira_barbara	1	undefined
IGA-2-25	Igapo	2019	58	2019-10-19	2019-12-16	2019-12-04	17:43:28	MAMMAL	Frugivore.Granivore	Myoprocta	acouchy	Myoprocta_acouchy	1	undefined
IGA-2-25	Igapo	2019	58	2019-10-19	2019-12-16	2019-11-05	09:28:20	MAMMAL	Frugivore.Omnivore	Nasua	nasua	Nasua_nasua	5	undefined
IGA-2-25	Igapo	2019	58	2019-10-19	2019-12-16	2019-10-20	19:11:31	MAMMAL	Frugivore.Omnivore	Didelphis	marsupialis	Didelphis_marsupialis	1	undefined
IGA-2-25	Igapo	2019	58	2019-10-19	2019-12-16	2019-10-19	15:04:30	INSTALL	Setup	Setup	Setup	Setup	1	undefined
IGA-2-25	Igapo	2019	58	2019-10-19	2019-12-16	2019-12-07	19:06:55	MAMMAL	Frugivore.Omnivore	Didelphis	marsupialis	Didelphis_marsupialis	1	undefined
IGA-2-25	Igapo	2019	58	2019-10-19	2019-12-16	2019-12-07	06:39:17	MAMMAL	Frugivore.Granivore	Myoprocta	acouchy	Myoprocta_acouchy	1	undefined
IGA-2-25	Igapo	2019	58	2019-10-19	2019-12-16	2019-12-16	06:05:12	MAMMAL	Frugivore.Granivore	Myoprocta	acouchy	Myoprocta_acouchy	1	undefined
IGA-2-25	Igapo	2019	58	2019-10-19	2019-12-16	2019-12-16	11:42:18	MAMMAL	Frugivore.Omnivore	Nasua	nasua	Nasua_nasua	1	undefined
IGA-2-25	Igapo	2019	58	2019-10-19	2019-12-16	2019-12-16	12:01:35	INSTALL	Retrieval	Retrieval	Retrieval	Pickup	1	undefined
IGA-2-25	Igapo	2019	58	2019-10-19	2019-12-16	2019-11-08	13:17:27	MAMMAL	Frugivore.Herbivore	Mazama	nemorivaga	Mazama_nemorivaga	1	Female
IGA-2-25	Igapo	2019	58	2019-10-19	2019-12-16	2019-11-16	16:45:45	MAMMAL	Frugivore.Granivore	Myoprocta	acouchy	Myoprocta_acouchy	1	undefined
IGA-2-25	Igapo	2019	58	2019-10-19	2019-12-16	2019-11-15	18:03:57	MAMMAL	Frugivore.Omnivore	Eira	barbara	Eira_barbara	1	undefined
IGA-2-25	Igapo	2019	58	2019-10-19	2019-12-16	2019-11-14	10:07:50	MAMMAL	Frugivore.Omnivore	Eira	barbara	Eira_barbara	1	undefined
IGA-2-25	Igapo	2019	58	2019-10-19	2019-12-16	2019-11-14	06:44:51	MAMMAL	Frugivore.Granivore	Myoprocta	acouchy	Myoprocta_acouchy	1	undefined
IGA-2-25	Igapo	2019	58	2019-10-19	2019-12-16	2019-12-10	17:27:59	MAMMAL	Frugivore.Granivore	Myoprocta	acouchy	Myoprocta_acouchy	1	undefined
IGA-2-25	Igapo	2019	58	2019-10-19	2019-12-16	2019-11-13	12:00:19	MAMMAL	Frugivore.Omnivore	Eira	barbara	Eira_barbara	1	Male
IGA-2-25	Igapo	2019	58	2019-10-19	2019-12-16	2019-11-13	06:23:16	MAMMAL	Frugivore.Granivore	Myoprocta	acouchy	Myoprocta_acouchy	1	undefined
IGA-2-25	Igapo	2019	58	2019-10-19	2019-12-16	2019-12-11	09:32:11	MAMMAL	Frugivore.Granivore	Myoprocta	acouchy	Myoprocta_acouchy	1	undefined
IGA-1-26	Igapo	2018	13	2018-10-22	2018-11-04	2018-11-04	20:01:54	MAMMAL	Insectivore.Omnivore	Dasypus	spp.	Dasypus_spp.	1	undefined
IGA-1-26	Igapo	2018	13	2018-10-22	2018-11-04	2018-10-22	14:22:45	INSTALL	Setup	Setup	Setup	Setup	1	undefined
IGA-2-26	Igapo	2019	58	2019-10-19	2019-12-16	2019-11-27	05:49:17	MAMMAL	Frugivore.Granivore	Dasyprocta	leporina	Dasyprocta_leporina	1	undefined
IGA-2-26	Igapo	2019	58	2019-10-19	2019-12-16	2019-11-27	19:02:55	MAMMAL	Frugivore.Omnivore	Didelphis	marsupialis	Didelphis_marsupialis	1	undefined
IGA-2-26	Igapo	2019	58	2019-10-19	2019-12-16	2019-10-28	12:20:51	MAMMAL	Frugivore.Granivore	Dasyprocta	leporina	Dasyprocta_leporina	1	undefined
IGA-2-26	Igapo	2019	58	2019-10-19	2019-12-16	2019-11-25	06:56:12	MAMMAL	Frugivore.Granivore	Dasyprocta	leporina	Dasyprocta_leporina	1	undefined
IGA-2-26	Igapo	2019	58	2019-10-19	2019-12-16	2019-11-25	18:35:53	MAMMAL	Frugivore.Omnivore	Didelphis	marsupialis	Didelphis_marsupialis	1	undefined
IGA-2-26	Igapo	2019	58	2019-10-19	2019-12-16	2019-10-31	04:32:49	MAMMAL	Frugivore.Omnivore	Didelphis	marsupialis	Didelphis_marsupialis	1	undefined
IGA-2-26	Igapo	2019	58	2019-10-19	2019-12-16	2019-11-24	05:51:41	MAMMAL	Frugivore.Granivore	Dasyprocta	leporina	Dasyprocta_leporina	1	undefined
IGA-2-26	Igapo	2019	58	2019-10-19	2019-12-16	2019-11-24	18:31:30	MAMMAL	Frugivore.Omnivore	Didelphis	marsupialis	Didelphis_marsupialis	1	undefined
IGA-2-26	Igapo	2019	58	2019-10-19	2019-12-16	2019-12-01	19:05:06	MAMMAL	Frugivore.Omnivore	Didelphis	marsupialis	Didelphis_marsupialis	1	undefined
IGA-2-26	Igapo	2019	58	2019-10-19	2019-12-16	2019-11-02	21:13:34	MAMMAL	Frugivore.Omnivore	Didelphis	marsupialis	Didelphis_marsupialis	1	undefined
IGA-2-26	Igapo	2019	58	2019-10-19	2019-12-16	2019-11-22	15:00:19	MAMMAL	Frugivore.Granivore	Dasyprocta	leporina	Dasyprocta_leporina	1	undefined
IGA-2-26	Igapo	2019	58	2019-10-19	2019-12-16	2019-11-22	02:37:49	MAMMAL	Frugivore.Omnivore	Didelphis	marsupialis	Didelphis_marsupialis	1	undefined
IGA-2-26	Igapo	2019	58	2019-10-19	2019-12-16	2019-12-02	06:52:21	MAMMAL	Frugivore.Granivore	Dasyprocta	leporina	Dasyprocta_leporina	1	undefined
IGA-2-26	Igapo	2019	58	2019-10-19	2019-12-16	2019-12-02	22:35:10	MAMMAL	Frugivore.Omnivore	Didelphis	marsupialis	Didelphis_marsupialis	1	undefined
IGA-2-26	Igapo	2019	58	2019-10-19	2019-12-16	2019-11-21	06:34:17	MAMMAL	Frugivore.Granivore	Dasyprocta	leporina	Dasyprocta_leporina	1	undefined
IGA-2-26	Igapo	2019	58	2019-10-19	2019-12-16	2019-11-21	20:38:01	MAMMAL	Frugivore.Omnivore	Didelphis	marsupialis	Didelphis_marsupialis	1	undefined
IGA-2-26	Igapo	2019	58	2019-10-19	2019-12-16	2019-12-03	06:27:30	MAMMAL	Frugivore.Granivore	Dasyprocta	leporina	Dasyprocta_leporina	1	undefined
IGA-2-26	Igapo	2019	58	2019-10-19	2019-12-16	2019-12-03	21:21:21	MAMMAL	Frugivore.Omnivore	Didelphis	marsupialis	Didelphis_marsupialis	1	undefined
IGA-2-26	Igapo	2019	58	2019-10-19	2019-12-16	2019-11-04	12:26:50	MAMMAL	Frugivore.Granivore	Dasyprocta	leporina	Dasyprocta_leporina	1	undefined
IGA-2-26	Igapo	2019	58	2019-10-19	2019-12-16	2019-11-20	09:59:01	MAMMAL	Frugivore.Granivore	Dasyprocta	leporina	Dasyprocta_leporina	1	undefined
IGA-2-26	Igapo	2019	58	2019-10-19	2019-12-16	2019-11-20	19:34:07	MAMMAL	Frugivore.Omnivore	Didelphis	marsupialis	Didelphis_marsupialis	1	undefined
IGA-2-26	Igapo	2019	58	2019-10-19	2019-12-16	2019-10-21	19:50:01	MAMMAL	Frugivore.Omnivore	Didelphis	marsupialis	Didelphis_marsupialis	1	undefined
IGA-2-26	Igapo	2019	58	2019-10-19	2019-12-16	2019-10-20	17:07:45	MAMMAL	Frugivore.Granivore	Dasyprocta	leporina	Dasyprocta_leporina	1	undefined
IGA-2-26	Igapo	2019	58	2019-10-19	2019-12-16	2019-10-20	00:52:30	MAMMAL	Frugivore.Omnivore	Didelphis	marsupialis	Didelphis_marsupialis	1	undefined
IGA-2-26	Igapo	2019	58	2019-10-19	2019-12-16	2019-10-20	20:10:48	MAMMAL	Frugivore.Omnivore	Didelphis	marsupialis	Didelphis_marsupialis	1	undefined
IGA-2-26	Igapo	2019	58	2019-10-19	2019-12-16	2019-11-06	10:10:07	MAMMAL	Frugivore.Granivore	Dasyprocta	leporina	Dasyprocta_leporina	1	undefined
IGA-2-26	Igapo	2019	58	2019-10-19	2019-12-16	2019-11-18	07:53:46	MAMMAL	Frugivore.Granivore	Dasyprocta	leporina	Dasyprocta_leporina	1	undefined
IGA-2-26	Igapo	2019	58	2019-10-19	2019-12-16	2019-12-06	14:01:56	MAMMAL	Frugivore.Granivore	Dasyprocta	leporina	Dasyprocta_leporina	1	undefined
IGA-2-26	Igapo	2019	58	2019-10-19	2019-12-16	2019-12-06	22:25:51	MAMMAL	Frugivore.Omnivore	Didelphis	marsupialis	Didelphis_marsupialis	1	undefined
IGA-2-26	Igapo	2019	58	2019-10-19	2019-12-16	2019-12-06	08:29:08	MAMMAL	Carnivore	Leopardus	pardalis	Leopardus_pardalis	1	Male
IGA-2-26	Igapo	2019	58	2019-10-19	2019-12-16	2019-10-19	22:00:16	MAMMAL	Frugivore.Omnivore	Didelphis	marsupialis	Didelphis_marsupialis	1	undefined
IGA-2-26	Igapo	2019	58	2019-10-19	2019-12-16	2019-10-19	12:52:35	INSTALL	Setup	Setup	Setup	Setup	1	undefined
IGA-2-26	Igapo	2019	58	2019-10-19	2019-12-16	2019-11-17	08:30:05	MAMMAL	Frugivore.Granivore	Dasyprocta	leporina	Dasyprocta_leporina	1	undefined
IGA-2-26	Igapo	2019	58	2019-10-19	2019-12-16	2019-12-07	06:50:18	MAMMAL	Frugivore.Granivore	Dasyprocta	leporina	Dasyprocta_leporina	1	undefined
IGA-2-26	Igapo	2019	58	2019-10-19	2019-12-16	2019-12-16	11:12:20	INSTALL	Retrieval	Retrieval	Retrieval	Pickup	1	undefined
IGA-2-26	Igapo	2019	58	2019-10-19	2019-12-16	2019-11-08	19:50:41	MAMMAL	Frugivore.Omnivore	Didelphis	marsupialis	Didelphis_marsupialis	1	undefined
IGA-2-26	Igapo	2019	58	2019-10-19	2019-12-16	2019-11-16	19:08:35	MAMMAL	Insectivore.Omnivore	Philander	opossum	Philander_opossum	1	undefined
IGA-2-26	Igapo	2019	58	2019-10-19	2019-12-16	2019-11-10	07:02:11	MAMMAL	Frugivore.Granivore	Dasyprocta	leporina	Dasyprocta_leporina	1	undefined
IGA-2-26	Igapo	2019	58	2019-10-19	2019-12-16	2019-12-10	06:49:22	MAMMAL	Frugivore.Granivore	Dasyprocta	leporina	Dasyprocta_leporina	1	undefined
IGA-2-26	Igapo	2019	58	2019-10-19	2019-12-16	2019-12-10	01:31:20	MAMMAL	Frugivore.Omnivore	Didelphis	marsupialis	Didelphis_marsupialis	1	undefined
IGA-2-26	Igapo	2019	58	2019-10-19	2019-12-16	2019-11-13	07:04:51	MAMMAL	Frugivore.Granivore	Dasyprocta	leporina	Dasyprocta_leporina	1	undefined
IGA-2-26	Igapo	2019	58	2019-10-19	2019-12-16	2019-12-11	20:16:58	MAMMAL	Frugivore.Omnivore	Didelphis	marsupialis	Didelphis_marsupialis	2	undefined
IGA-2-26	Igapo	2019	58	2019-10-19	2019-12-16	2019-12-12	07:14:51	MAMMAL	Frugivore.Granivore	Dasyprocta	leporina	Dasyprocta_leporina	1	undefined
IGA-2-26	Igapo	2019	58	2019-10-19	2019-12-16	2019-12-12	19:20:42	MAMMAL	Frugivore.Omnivore	Didelphis	marsupialis	Didelphis_marsupialis	1	undefined
IGA-2-26	Igapo	2019	58	2019-10-19	2019-12-16	2019-11-12	07:59:19	MAMMAL	Frugivore.Granivore	Dasyprocta	leporina	Dasyprocta_leporina	1	undefined
IGA-1-27	Igapo	2018	50	2018-10-21	2018-12-10	2018-12-09	18:22:42	MAMMAL	Frugivore.Herbivore	Hydrochoerus	hydrochaeris	Hydrochoerus_hydrochaeris	1	undefined
IGA-1-27	Igapo	2018	50	2018-10-21	2018-12-10	2018-12-10	08:12:16	INSTALL	Retrieval	Retrieval	Retrieval	Pickup	1	undefined
IGA-1-27	Igapo	2018	50	2018-10-21	2018-12-10	2018-12-01	20:36:08	MAMMAL	Frugivore.Granivore	Dasyprocta	leporina	Dasyprocta_leporina	1	undefined
IGA-1-27	Igapo	2018	50	2018-10-21	2018-12-10	2018-11-29	08:28:30	MAMMAL	Frugivore.Granivore	Dasyprocta	leporina	Dasyprocta_leporina	1	undefined
IGA-1-27	Igapo	2018	50	2018-10-21	2018-12-10	2018-11-28	16:54:17	MAMMAL	Frugivore.Granivore	Dasyprocta	leporina	Dasyprocta_leporina	1	undefined
IGA-1-27	Igapo	2018	50	2018-10-21	2018-12-10	2018-11-27	22:32:50	MAMMAL	Insectivore.Omnivore	Metachirus	nudicaudatus	Metachirus_nudicaudatus	1	undefined
IGA-1-27	Igapo	2018	50	2018-10-21	2018-12-10	2018-10-21	16:06:42	INSTALL	Setup	Setup	Setup	Setup	1	undefined
IGA-1-27	Igapo	2018	50	2018-10-21	2018-12-10	2018-11-25	05:50:25	MAMMAL	Frugivore.Granivore	Dasyprocta	leporina	Dasyprocta_leporina	1	undefined
IGA-2-27	Igapo	2019	56	2019-10-19	2019-12-14	2019-10-24	16:30:08	MAMMAL	Frugivore.Granivore	Dasyprocta	leporina	Dasyprocta_leporina	1	undefined
IGA-2-27	Igapo	2019	56	2019-10-19	2019-12-14	2019-10-21	07:45:53	MAMMAL	Frugivore.Granivore	Dasyprocta	leporina	Dasyprocta_leporina	1	undefined
IGA-2-27	Igapo	2019	56	2019-10-19	2019-12-14	2019-10-19	12:10:01	INSTALL	Setup	Setup	Setup	Setup	1	undefined
IGA-2-27	Igapo	2019	56	2019-10-19	2019-12-14	2019-12-14	11:00:29	INSTALL	Retrieval	Retrieval	Retrieval	Pickup	1	undefined
IGA-1-28	Igapo	2018	76	2018-10-21	2019-01-05	2018-12-07	05:50:39	MAMMAL	Frugivore.Granivore	Dasyprocta	leporina	Dasyprocta_leporina	1	undefined
IGA-1-28	Igapo	2018	76	2018-10-21	2019-01-05	2019-01-05	06:54:42	INSTALL	Retrieval	Retrieval	Retrieval	Pickup	1	undefined
IGA-1-28	Igapo	2018	76	2018-10-21	2019-01-05	2018-12-06	06:24:39	MAMMAL	Frugivore.Granivore	Dasyprocta	leporina	Dasyprocta_leporina	1	undefined
IGA-1-28	Igapo	2018	76	2018-10-21	2019-01-05	2018-12-06	00:39:37	MAMMAL	Frugivore.Granivore	Proechimys	spp.	Proechimys_spp.	1	undefined
IGA-1-28	Igapo	2018	76	2018-10-21	2019-01-05	2018-12-05	13:10:24	MAMMAL	Frugivore.Granivore	Dasyprocta	leporina	Dasyprocta_leporina	1	undefined
IGA-1-28	Igapo	2018	76	2018-10-21	2019-01-05	2018-12-10	22:13:27	MAMMAL	Frugivore.Granivore	Proechimys	spp.	Proechimys_spp.	1	undefined
IGA-1-28	Igapo	2018	76	2018-10-21	2019-01-05	2019-01-03	13:56:24	MAMMAL	Frugivore.Granivore	Dasyprocta	leporina	Dasyprocta_leporina	1	undefined
IGA-1-28	Igapo	2018	76	2018-10-21	2019-01-05	2018-11-04	16:52:33	MAMMAL	Frugivore.Granivore	Dasyprocta	leporina	Dasyprocta_leporina	1	undefined
IGA-1-28	Igapo	2018	76	2018-10-21	2019-01-05	2018-11-04	00:00:38	MAMMAL	Frugivore.Granivore	Proechimys	spp.	Proechimys_spp.	1	undefined
IGA-1-28	Igapo	2018	76	2018-10-21	2019-01-05	2019-01-02	11:26:02	MAMMAL	Frugivore.Granivore	Dasyprocta	leporina	Dasyprocta_leporina	1	undefined
IGA-1-28	Igapo	2018	76	2018-10-21	2019-01-05	2018-12-03	05:56:03	MAMMAL	Frugivore.Granivore	Dasyprocta	leporina	Dasyprocta_leporina	1	undefined
IGA-1-28	Igapo	2018	76	2018-10-21	2019-01-05	2018-12-12	13:26:44	MAMMAL	Frugivore.Granivore	Dasyprocta	leporina	Dasyprocta_leporina	1	undefined
IGA-1-28	Igapo	2018	76	2018-10-21	2019-01-05	2018-12-12	23:13:01	MAMMAL	Frugivore.Omnivore	Didelphis	marsupialis	Didelphis_marsupialis	1	undefined
IGA-1-28	Igapo	2018	76	2018-10-21	2019-01-05	2018-11-03	06:14:13	MAMMAL	Frugivore.Granivore	Dasyprocta	leporina	Dasyprocta_leporina	1	undefined
IGA-1-28	Igapo	2018	76	2018-10-21	2019-01-05	2019-01-01	13:23:10	MAMMAL	Frugivore.Granivore	Dasyprocta	leporina	Dasyprocta_leporina	1	undefined
IGA-1-28	Igapo	2018	76	2018-10-21	2019-01-05	2018-12-02	05:55:48	MAMMAL	Frugivore.Granivore	Dasyprocta	leporina	Dasyprocta_leporina	1	undefined
IGA-1-28	Igapo	2018	76	2018-10-21	2019-01-05	2018-11-02	05:59:09	MAMMAL	Frugivore.Granivore	Dasyprocta	leporina	Dasyprocta_leporina	1	undefined
IGA-1-28	Igapo	2018	76	2018-10-21	2019-01-05	2018-12-01	11:37:40	MAMMAL	Frugivore.Granivore	Dasyprocta	leporina	Dasyprocta_leporina	1	undefined
IGA-1-28	Igapo	2018	76	2018-10-21	2019-01-05	2018-11-01	08:38:17	MAMMAL	Frugivore.Granivore	Dasyprocta	leporina	Dasyprocta_leporina	1	undefined
IGA-1-28	Igapo	2018	76	2018-10-21	2019-01-05	2018-11-30	17:04:02	MAMMAL	Frugivore.Granivore	Dasyprocta	leporina	Dasyprocta_leporina	1	undefined
IGA-1-28	Igapo	2018	76	2018-10-21	2019-01-05	2018-11-30	18:06:06	MAMMAL	Frugivore.Granivore	Dasyprocta	leporina	Dasyprocta_leporina	1	undefined
IGA-1-28	Igapo	2018	76	2018-10-21	2019-01-05	2018-12-15	01:58:09	MAMMAL	Frugivore.Omnivore	Didelphis	marsupialis	Didelphis_marsupialis	1	undefined
IGA-1-28	Igapo	2018	76	2018-10-21	2019-01-05	2018-12-29	16:08:51	MAMMAL	Frugivore.Granivore	Dasyprocta	leporina	Dasyprocta_leporina	1	undefined
IGA-1-28	Igapo	2018	76	2018-10-21	2019-01-05	2018-11-16	07:59:00	MAMMAL	Frugivore.Granivore	Dasyprocta	leporina	Dasyprocta_leporina	1	undefined
IGA-1-28	Igapo	2018	76	2018-10-21	2019-01-05	2018-11-16	19:14:32	MAMMAL	Frugivore.Omnivore	Didelphis	marsupialis	Didelphis_marsupialis	1	undefined
IGA-1-28	Igapo	2018	76	2018-10-21	2019-01-05	2018-10-30	01:59:01	MAMMAL	Frugivore.Omnivore	Didelphis	marsupialis	Didelphis_marsupialis	1	undefined
IGA-1-28	Igapo	2018	76	2018-10-21	2019-01-05	2018-12-28	19:18:30	MAMMAL	Insectivore.Omnivore	Philander	opossum	Philander_opossum	1	undefined
IGA-1-28	Igapo	2018	76	2018-10-21	2019-01-05	2018-12-27	19:34:54	MAMMAL	Frugivore.Omnivore	Didelphis	marsupialis	Didelphis_marsupialis	1	undefined
IGA-1-28	Igapo	2018	76	2018-10-21	2019-01-05	2018-11-18	07:18:15	MAMMAL	Frugivore.Granivore	Dasyprocta	leporina	Dasyprocta_leporina	1	undefined
IGA-1-28	Igapo	2018	76	2018-10-21	2019-01-05	2018-11-27	12:34:56	MAMMAL	Frugivore.Granivore	Dasyprocta	leporina	Dasyprocta_leporina	1	undefined
IGA-1-28	Igapo	2018	76	2018-10-21	2019-01-05	2018-12-18	02:02:27	MAMMAL	Frugivore.Omnivore	Didelphis	marsupialis	Didelphis_marsupialis	1	undefined
IGA-1-28	Igapo	2018	76	2018-10-21	2019-01-05	2018-11-26	13:10:06	MAMMAL	Frugivore.Granivore	Dasyprocta	leporina	Dasyprocta_leporina	1	undefined
IGA-1-28	Igapo	2018	76	2018-10-21	2019-01-05	2018-10-21	14:15:29	INSTALL	Setup	Setup	Setup	Setup	1	undefined
IGA-1-28	Igapo	2018	76	2018-10-21	2019-01-05	2018-10-27	07:44:52	MAMMAL	Frugivore.Granivore	Dasyprocta	leporina	Dasyprocta_leporina	1	undefined
IGA-1-28	Igapo	2018	76	2018-10-21	2019-01-05	2018-10-27	11:39:36	MAMMAL	Frugivore.Granivore	Dasyprocta	leporina	Dasyprocta_leporina	1	undefined
IGA-1-28	Igapo	2018	76	2018-10-21	2019-01-05	2018-12-25	17:09:10	MAMMAL	Frugivore.Granivore	Dasyprocta	leporina	Dasyprocta_leporina	1	undefined
IGA-1-28	Igapo	2018	76	2018-10-21	2019-01-05	2018-11-20	07:46:17	MAMMAL	Frugivore.Granivore	Dasyprocta	leporina	Dasyprocta_leporina	1	undefined
IGA-1-28	Igapo	2018	76	2018-10-21	2019-01-05	2018-12-20	14:41:43	MAMMAL	Frugivore.Granivore	Dasyprocta	leporina	Dasyprocta_leporina	1	undefined
IGA-1-28	Igapo	2018	76	2018-10-21	2019-01-05	2018-11-21	17:00:32	MAMMAL	Frugivore.Granivore	Dasyprocta	leporina	Dasyprocta_leporina	1	undefined
IGA-1-28	Igapo	2018	76	2018-10-21	2019-01-05	2018-11-23	06:39:45	MAMMAL	Frugivore.Granivore	Dasyprocta	leporina	Dasyprocta_leporina	1	undefined
IGA-1-28	Igapo	2018	76	2018-10-21	2019-01-05	2018-12-22	11:01:56	MAMMAL	Frugivore.Granivore	Dasyprocta	leporina	Dasyprocta_leporina	1	undefined
IGA-1-28	Igapo	2018	76	2018-10-21	2019-01-05	2018-12-22	22:30:54	MAMMAL	Insectivore.Omnivore	Metachirus	nudicaudatus	Metachirus_nudicaudatus	1	undefined
IGA-2-28	Igapo	2019	58	2019-10-19	2019-12-16	2019-10-28	08:52:20	MAMMAL	Carnivore	Puma	yagouaroundi	Puma_yagouaroundi	1	undefined
IGA-2-28	Igapo	2019	58	2019-10-19	2019-12-16	2019-10-29	02:19:27	MAMMAL	Frugivore.Omnivore	Didelphis	marsupialis	Didelphis_marsupialis	1	undefined
IGA-2-28	Igapo	2019	58	2019-10-19	2019-12-16	2019-11-26	07:24:36	MAMMAL	Frugivore.Granivore	Dasyprocta	leporina	Dasyprocta_leporina	1	undefined
IGA-2-28	Igapo	2019	58	2019-10-19	2019-12-16	2019-10-27	05:34:13	MAMMAL	Frugivore.Granivore	Dasyprocta	leporina	Dasyprocta_leporina	1	undefined
IGA-2-28	Igapo	2019	58	2019-10-19	2019-12-16	2019-10-27	02:15:55	MAMMAL	Frugivore.Omnivore	Didelphis	marsupialis	Didelphis_marsupialis	1	undefined
IGA-2-28	Igapo	2019	58	2019-10-19	2019-12-16	2019-10-30	07:35:48	MAMMAL	Frugivore.Granivore	Dasyprocta	leporina	Dasyprocta_leporina	1	undefined
IGA-2-28	Igapo	2019	58	2019-10-19	2019-12-16	2019-11-24	07:37:08	MAMMAL	Frugivore.Granivore	Dasyprocta	leporina	Dasyprocta_leporina	1	undefined
IGA-2-28	Igapo	2019	58	2019-10-19	2019-12-16	2019-11-23	02:14:24	MAMMAL	nodata	Oecomys	spp.	Oecomys_spp.	1	undefined
IGA-2-28	Igapo	2019	58	2019-10-19	2019-12-16	2019-10-24	07:22:08	MAMMAL	Frugivore.Granivore	Dasyprocta	leporina	Dasyprocta_leporina	1	undefined
IGA-2-28	Igapo	2019	58	2019-10-19	2019-12-16	2019-11-22	19:11:19	MAMMAL	Frugivore.Herbivore	Cuniculus	paca	Cuniculus_paca	1	undefined
IGA-2-28	Igapo	2019	58	2019-10-19	2019-12-16	2019-11-03	01:48:16	MAMMAL	nodata	Oecomys	spp.	Oecomys_spp.	1	undefined
IGA-2-28	Igapo	2019	58	2019-10-19	2019-12-16	2019-11-03	03:58:10	MAMMAL	nodata	Oecomys	spp.	Oecomys_spp.	1	undefined
IGA-2-28	Igapo	2019	58	2019-10-19	2019-12-16	2019-11-04	05:24:39	MAMMAL	Frugivore.Granivore	Dasyprocta	leporina	Dasyprocta_leporina	1	undefined
IGA-2-28	Igapo	2019	58	2019-10-19	2019-12-16	2019-11-20	06:13:33	MAMMAL	Frugivore.Granivore	Dasyprocta	leporina	Dasyprocta_leporina	1	undefined
IGA-2-28	Igapo	2019	58	2019-10-19	2019-12-16	2019-11-19	21:18:58	MAMMAL	Frugivore.Herbivore	Cuniculus	paca	Cuniculus_paca	1	undefined
IGA-2-28	Igapo	2019	58	2019-10-19	2019-12-16	2019-10-20	21:05:48	MAMMAL	Frugivore.Herbivore	Cuniculus	paca	Cuniculus_paca	1	undefined
IGA-2-28	Igapo	2019	58	2019-10-19	2019-12-16	2019-10-20	21:11:28	MAMMAL	Frugivore.Omnivore	Didelphis	marsupialis	Didelphis_marsupialis	1	undefined
IGA-2-28	Igapo	2019	58	2019-10-19	2019-12-16	2019-11-06	06:12:55	MAMMAL	Frugivore.Granivore	Dasyprocta	leporina	Dasyprocta_leporina	1	undefined
IGA-2-28	Igapo	2019	58	2019-10-19	2019-12-16	2019-10-19	10:50:58	INSTALL	Setup	Setup	Setup	Setup	1	undefined
IGA-2-28	Igapo	2019	58	2019-10-19	2019-12-16	2019-11-17	08:37:32	MAMMAL	Frugivore.Granivore	Dasyprocta	leporina	Dasyprocta_leporina	1	undefined
IGA-2-28	Igapo	2019	58	2019-10-19	2019-12-16	2019-12-16	08:27:01	MAMMAL	Frugivore.Granivore	Dasyprocta	leporina	Dasyprocta_leporina	1	undefined
IGA-2-28	Igapo	2019	58	2019-10-19	2019-12-16	2019-12-16	11:05:22	INSTALL	Retrieval	Retrieval	Retrieval	Pickup	1	undefined
IGA-2-28	Igapo	2019	58	2019-10-19	2019-12-16	2019-12-08	01:20:17	MAMMAL	Frugivore.Herbivore	Cuniculus	paca	Cuniculus_paca	1	undefined
IGA-2-28	Igapo	2019	58	2019-10-19	2019-12-16	2019-12-15	18:36:36	MAMMAL	Frugivore.Omnivore	Didelphis	marsupialis	Didelphis_marsupialis	1	undefined
IGA-2-28	Igapo	2019	58	2019-10-19	2019-12-16	2019-12-09	14:58:29	MAMMAL	Frugivore.Granivore	Dasyprocta	leporina	Dasyprocta_leporina	1	undefined
IGA-2-28	Igapo	2019	58	2019-10-19	2019-12-16	2019-12-14	06:07:10	MAMMAL	Frugivore.Granivore	Dasyprocta	leporina	Dasyprocta_leporina	1	undefined
IGA-2-28	Igapo	2019	58	2019-10-19	2019-12-16	2019-12-14	03:37:16	MAMMAL	Frugivore.Omnivore	Didelphis	marsupialis	Didelphis_marsupialis	1	undefined
IGA-2-28	Igapo	2019	58	2019-10-19	2019-12-16	2019-11-11	08:01:24	MAMMAL	Frugivore.Granivore	Dasyprocta	leporina	Dasyprocta_leporina	1	undefined
IGA-2-28	Igapo	2019	58	2019-10-19	2019-12-16	2019-12-11	00:10:55	MAMMAL	Frugivore.Omnivore	Didelphis	marsupialis	Didelphis_marsupialis	1	undefined
IGA-2-28	Igapo	2019	58	2019-10-19	2019-12-16	2019-12-12	16:21:50	MAMMAL	Frugivore.Granivore	Dasyprocta	leporina	Dasyprocta_leporina	1	undefined
IGA-2-28	Igapo	2019	58	2019-10-19	2019-12-16	2019-11-12	07:18:01	MAMMAL	Frugivore.Granivore	Dasyprocta	leporina	Dasyprocta_leporina	1	undefined
IGA-1-29	Igapo	2018	74	2018-10-21	2019-01-03	2018-11-08	06:25:03	MAMMAL	Frugivore.Omnivore	Nasua	nasua	Nasua_nasua	1	undefined
IGA-1-29	Igapo	2018	74	2018-10-21	2019-01-03	2018-12-07	03:56:53	MAMMAL	Frugivore.Herbivore	Cuniculus	paca	Cuniculus_paca	1	undefined
IGA-1-29	Igapo	2018	74	2018-10-21	2019-01-03	2018-12-07	14:59:32	MAMMAL	Frugivore.Granivore	Dasyprocta	leporina	Dasyprocta_leporina	1	undefined
IGA-1-29	Igapo	2018	74	2018-10-21	2019-01-03	2018-12-07	04:53:20	MAMMAL	Insectivore.Omnivore	Philander	opossum	Philander_opossum	1	undefined
IGA-1-29	Igapo	2018	74	2018-10-21	2019-01-03	2018-12-06	16:25:38	MAMMAL	Frugivore.Granivore	Dasyprocta	leporina	Dasyprocta_leporina	1	undefined
IGA-1-29	Igapo	2018	74	2018-10-21	2019-01-03	2018-12-09	02:15:43	MAMMAL	Frugivore.Herbivore	Cuniculus	paca	Cuniculus_paca	1	undefined
IGA-1-29	Igapo	2018	74	2018-10-21	2019-01-03	2018-12-09	17:54:53	MAMMAL	Frugivore.Granivore	Myoprocta	acouchy	Myoprocta_acouchy	1	undefined
IGA-1-29	Igapo	2018	74	2018-10-21	2019-01-03	2018-11-10	15:34:52	MAMMAL	Frugivore.Herbivore	Mazama	nemorivaga	Mazama_nemorivaga	1	undefined
IGA-1-29	Igapo	2018	74	2018-10-21	2019-01-03	2018-12-05	10:12:56	MAMMAL	Frugivore.Granivore	Dasyprocta	leporina	Dasyprocta_leporina	1	undefined
IGA-1-29	Igapo	2018	74	2018-10-21	2019-01-03	2018-12-10	00:03:00	MAMMAL	Frugivore.Herbivore	Cuniculus	paca	Cuniculus_paca	1	undefined
IGA-1-29	Igapo	2018	74	2018-10-21	2019-01-03	2018-11-05	00:09:52	MAMMAL	Carnivore	Leopardus	pardalis	Leopardus_pardalis	1	undefined
IGA-1-29	Igapo	2018	74	2018-10-21	2019-01-03	2019-01-03	12:15:52	INSTALL	Retrieval	Retrieval	Retrieval	Pickup	1	undefined
IGA-1-29	Igapo	2018	74	2018-10-21	2019-01-03	2018-11-11	14:39:14	MAMMAL	Frugivore.Herbivore	Mazama	nemorivaga	Mazama_nemorivaga	1	undefined
IGA-1-29	Igapo	2018	74	2018-10-21	2019-01-03	2018-12-04	10:37:57	MAMMAL	Frugivore.Granivore	Dasyprocta	leporina	Dasyprocta_leporina	1	undefined
IGA-1-29	Igapo	2018	74	2018-10-21	2019-01-03	2018-12-11	01:02:00	MAMMAL	Frugivore.Herbivore	Cuniculus	paca	Cuniculus_paca	1	undefined
IGA-1-29	Igapo	2018	74	2018-10-21	2019-01-03	2019-01-02	22:24:16	MAMMAL	Frugivore.Herbivore	Cuniculus	paca	Cuniculus_paca	1	undefined
IGA-1-29	Igapo	2018	74	2018-10-21	2019-01-03	2019-01-02	03:25:32	MAMMAL	Frugivore.Omnivore	Didelphis	marsupialis	Didelphis_marsupialis	1	undefined
IGA-1-29	Igapo	2018	74	2018-10-21	2019-01-03	2019-01-01	03:38:39	MAMMAL	Frugivore.Herbivore	Cuniculus	paca	Cuniculus_paca	1	undefined
IGA-1-29	Igapo	2018	74	2018-10-21	2019-01-03	2019-01-01	07:36:12	MAMMAL	Frugivore.Granivore	Dasyprocta	leporina	Dasyprocta_leporina	1	undefined
IGA-1-29	Igapo	2018	74	2018-10-21	2019-01-03	2019-01-01	01:29:15	MAMMAL	Frugivore.Omnivore	Didelphis	marsupialis	Didelphis_marsupialis	1	undefined
IGA-1-29	Igapo	2018	74	2018-10-21	2019-01-03	2019-01-01	05:59:21	MAMMAL	Frugivore.Granivore	Myoprocta	acouchy	Myoprocta_acouchy	1	undefined
IGA-1-29	Igapo	2018	74	2018-10-21	2019-01-03	2019-01-01	18:30:33	MAMMAL	Frugivore.Granivore	Myoprocta	acouchy	Myoprocta_acouchy	1	undefined
IGA-1-29	Igapo	2018	74	2018-10-21	2019-01-03	2018-12-02	03:17:49	MAMMAL	Frugivore.Herbivore	Cuniculus	paca	Cuniculus_paca	1	undefined
IGA-1-29	Igapo	2018	74	2018-10-21	2019-01-03	2018-11-02	10:19:54	MAMMAL	Frugivore.Granivore	Dasyprocta	leporina	Dasyprocta_leporina	1	undefined
IGA-1-29	Igapo	2018	74	2018-10-21	2019-01-03	2018-12-31	06:53:25	MAMMAL	Frugivore.Granivore	Dasyprocta	leporina	Dasyprocta_leporina	1	undefined
IGA-1-29	Igapo	2018	74	2018-10-21	2019-01-03	2018-12-31	17:00:41	MAMMAL	Frugivore.Granivore	Dasyprocta	leporina	Dasyprocta_leporina	1	undefined
IGA-1-29	Igapo	2018	74	2018-10-21	2019-01-03	2018-12-31	19:34:28	MAMMAL	Frugivore.Omnivore	Didelphis	marsupialis	Didelphis_marsupialis	1	undefined
IGA-1-29	Igapo	2018	74	2018-10-21	2019-01-03	2018-12-31	05:38:48	MAMMAL	Frugivore.Granivore	Myoprocta	acouchy	Myoprocta_acouchy	1	undefined
IGA-1-29	Igapo	2018	74	2018-10-21	2019-01-03	2018-12-31	18:25:22	MAMMAL	Frugivore.Granivore	Myoprocta	acouchy	Myoprocta_acouchy	1	undefined
IGA-1-29	Igapo	2018	74	2018-10-21	2019-01-03	2018-12-30	01:24:54	MAMMAL	Frugivore.Herbivore	Cuniculus	paca	Cuniculus_paca	1	undefined
IGA-1-29	Igapo	2018	74	2018-10-21	2019-01-03	2018-12-30	05:56:58	MAMMAL	Frugivore.Granivore	Dasyprocta	leporina	Dasyprocta_leporina	1	undefined
IGA-1-29	Igapo	2018	74	2018-10-21	2019-01-03	2018-12-30	17:40:44	MAMMAL	Frugivore.Granivore	Dasyprocta	leporina	Dasyprocta_leporina	1	undefined
IGA-1-29	Igapo	2018	74	2018-10-21	2019-01-03	2018-11-15	07:16:42	MAMMAL	Frugivore.Omnivore	Nasua	nasua	Nasua_nasua	1	undefined
IGA-1-29	Igapo	2018	74	2018-10-21	2019-01-03	2018-11-30	07:59:20	MAMMAL	Frugivore.Herbivore	Mazama	nemorivaga	Mazama_nemorivaga	1	undefined
IGA-1-29	Igapo	2018	74	2018-10-21	2019-01-03	2018-12-29	06:13:41	MAMMAL	Frugivore.Granivore	Dasyprocta	leporina	Dasyprocta_leporina	1	undefined
IGA-1-29	Igapo	2018	74	2018-10-21	2019-01-03	2018-12-29	15:51:10	MAMMAL	Frugivore.Granivore	Dasyprocta	leporina	Dasyprocta_leporina	1	undefined
IGA-1-29	Igapo	2018	74	2018-10-21	2019-01-03	2018-12-29	17:51:41	MAMMAL	Frugivore.Granivore	Dasyprocta	leporina	Dasyprocta_leporina	1	undefined
IGA-1-29	Igapo	2018	74	2018-10-21	2019-01-03	2018-12-29	01:53:13	MAMMAL	Frugivore.Omnivore	Didelphis	marsupialis	Didelphis_marsupialis	1	undefined
IGA-1-29	Igapo	2018	74	2018-10-21	2019-01-03	2018-12-28	00:51:44	MAMMAL	Frugivore.Herbivore	Cuniculus	paca	Cuniculus_paca	1	undefined
IGA-1-29	Igapo	2018	74	2018-10-21	2019-01-03	2018-12-28	20:47:07	MAMMAL	Frugivore.Herbivore	Cuniculus	paca	Cuniculus_paca	1	undefined
IGA-1-29	Igapo	2018	74	2018-10-21	2019-01-03	2018-12-28	13:40:16	MAMMAL	Frugivore.Granivore	Dasyprocta	leporina	Dasyprocta_leporina	1	undefined
IGA-1-29	Igapo	2018	74	2018-10-21	2019-01-03	2018-11-17	04:14:58	MAMMAL	Frugivore.Herbivore	Cuniculus	paca	Cuniculus_paca	1	undefined
IGA-1-29	Igapo	2018	74	2018-10-21	2019-01-03	2018-11-17	09:28:01	MAMMAL	Frugivore.Granivore	Dasyprocta	leporina	Dasyprocta_leporina	1	undefined
IGA-1-29	Igapo	2018	74	2018-10-21	2019-01-03	2018-12-27	00:46:18	MAMMAL	Frugivore.Herbivore	Cuniculus	paca	Cuniculus_paca	1	undefined
IGA-1-29	Igapo	2018	74	2018-10-21	2019-01-03	2018-12-27	19:31:02	MAMMAL	Frugivore.Herbivore	Cuniculus	paca	Cuniculus_paca	1	undefined
IGA-1-29	Igapo	2018	74	2018-10-21	2019-01-03	2018-12-27	11:19:54	MAMMAL	Frugivore.Granivore	Dasyprocta	leporina	Dasyprocta_leporina	1	undefined
IGA-1-29	Igapo	2018	74	2018-10-21	2019-01-03	2018-12-27	17:15:25	MAMMAL	Frugivore.Granivore	Dasyprocta	leporina	Dasyprocta_leporina	1	undefined
IGA-1-29	Igapo	2018	74	2018-10-21	2019-01-03	2018-12-27	22:25:49	MAMMAL	Insectivore.Omnivore	Metachirus	nudicaudatus	Metachirus_nudicaudatus	1	undefined
IGA-1-29	Igapo	2018	74	2018-10-21	2019-01-03	2018-11-18	07:15:30	MAMMAL	Frugivore.Granivore	Dasyprocta	leporina	Dasyprocta_leporina	1	undefined
IGA-1-29	Igapo	2018	74	2018-10-21	2019-01-03	2018-11-18	10:56:04	MAMMAL	Frugivore.Omnivore	Nasua	nasua	Nasua_nasua	1	undefined
IGA-1-29	Igapo	2018	74	2018-10-21	2019-01-03	2018-12-26	19:57:13	MAMMAL	Frugivore.Herbivore	Cuniculus	paca	Cuniculus_paca	1	undefined
IGA-1-29	Igapo	2018	74	2018-10-21	2019-01-03	2018-12-26	14:13:17	MAMMAL	Frugivore.Granivore	Dasyprocta	leporina	Dasyprocta_leporina	1	undefined
IGA-1-29	Igapo	2018	74	2018-10-21	2019-01-03	2018-11-19	16:15:10	MAMMAL	Frugivore.Granivore	Dasyprocta	leporina	Dasyprocta_leporina	1	undefined
IGA-1-29	Igapo	2018	74	2018-10-21	2019-01-03	2018-12-19	03:38:53	MAMMAL	Frugivore.Herbivore	Cuniculus	paca	Cuniculus_paca	1	undefined
IGA-1-29	Igapo	2018	74	2018-10-21	2019-01-03	2018-12-19	17:41:57	MAMMAL	Frugivore.Granivore	Dasyprocta	leporina	Dasyprocta_leporina	1	undefined
IGA-1-29	Igapo	2018	74	2018-10-21	2019-01-03	2018-12-19	05:35:15	MAMMAL	Frugivore.Granivore	Myoprocta	acouchy	Myoprocta_acouchy	1	undefined
IGA-1-29	Igapo	2018	74	2018-10-21	2019-01-03	2018-12-19	18:23:08	MAMMAL	Frugivore.Granivore	Myoprocta	acouchy	Myoprocta_acouchy	1	undefined
IGA-1-29	Igapo	2018	74	2018-10-21	2019-01-03	2018-10-21	13:19:09	INSTALL	Setup	Setup	Setup	Setup	1	undefined
IGA-1-29	Igapo	2018	74	2018-10-21	2019-01-03	2018-12-25	04:00:30	MAMMAL	Frugivore.Herbivore	Cuniculus	paca	Cuniculus_paca	1	undefined
IGA-1-29	Igapo	2018	74	2018-10-21	2019-01-03	2018-12-25	20:08:55	MAMMAL	Frugivore.Herbivore	Cuniculus	paca	Cuniculus_paca	1	undefined
IGA-1-29	Igapo	2018	74	2018-10-21	2019-01-03	2018-11-25	06:41:14	MAMMAL	Frugivore.Granivore	Dasyprocta	leporina	Dasyprocta_leporina	1	undefined
IGA-1-29	Igapo	2018	74	2018-10-21	2019-01-03	2018-12-20	03:49:02	MAMMAL	Frugivore.Herbivore	Cuniculus	paca	Cuniculus_paca	1	undefined
IGA-1-29	Igapo	2018	74	2018-10-21	2019-01-03	2018-12-20	08:59:16	MAMMAL	Frugivore.Granivore	Dasyprocta	leporina	Dasyprocta_leporina	1	undefined
IGA-1-29	Igapo	2018	74	2018-10-21	2019-01-03	2018-12-20	17:38:25	MAMMAL	Frugivore.Granivore	Dasyprocta	leporina	Dasyprocta_leporina	1	undefined
IGA-1-29	Igapo	2018	74	2018-10-21	2019-01-03	2018-12-20	18:07:23	MAMMAL	Frugivore.Granivore	Myoprocta	acouchy	Myoprocta_acouchy	1	undefined
IGA-1-29	Igapo	2018	74	2018-10-21	2019-01-03	2018-12-24	02:46:06	MAMMAL	Frugivore.Herbivore	Cuniculus	paca	Cuniculus_paca	1	undefined
IGA-1-29	Igapo	2018	74	2018-10-21	2019-01-03	2018-11-21	06:08:15	MAMMAL	Frugivore.Granivore	Dasyprocta	leporina	Dasyprocta_leporina	1	undefined
IGA-1-29	Igapo	2018	74	2018-10-21	2019-01-03	2018-11-24	10:53:59	MAMMAL	Frugivore.Granivore	Dasyprocta	leporina	Dasyprocta_leporina	1	undefined
IGA-1-29	Igapo	2018	74	2018-10-21	2019-01-03	2018-11-24	03:56:29	MAMMAL	Frugivore.Omnivore	Didelphis	marsupialis	Didelphis_marsupialis	1	undefined
IGA-1-29	Igapo	2018	74	2018-10-21	2019-01-03	2018-12-21	03:19:47	MAMMAL	Frugivore.Herbivore	Cuniculus	paca	Cuniculus_paca	1	undefined
IGA-1-29	Igapo	2018	74	2018-10-21	2019-01-03	2018-12-21	09:43:18	MAMMAL	Frugivore.Granivore	Dasyprocta	leporina	Dasyprocta_leporina	1	undefined
IGA-1-29	Igapo	2018	74	2018-10-21	2019-01-03	2018-12-21	14:10:10	MAMMAL	Frugivore.Granivore	Dasyprocta	leporina	Dasyprocta_leporina	1	undefined
IGA-1-29	Igapo	2018	74	2018-10-21	2019-01-03	2018-12-21	05:54:02	MAMMAL	Frugivore.Granivore	Myoprocta	acouchy	Myoprocta_acouchy	1	undefined
IGA-1-29	Igapo	2018	74	2018-10-21	2019-01-03	2018-12-21	18:03:15	MAMMAL	Frugivore.Granivore	Myoprocta	acouchy	Myoprocta_acouchy	1	undefined
IGA-1-29	Igapo	2018	74	2018-10-21	2019-01-03	2018-10-23	17:54:54	MAMMAL	Frugivore.Granivore	Myoprocta	acouchy	Myoprocta_acouchy	1	undefined
IGA-1-29	Igapo	2018	74	2018-10-21	2019-01-03	2018-10-25	06:39:37	MAMMAL	Frugivore.Granivore	Dasyprocta	leporina	Dasyprocta_leporina	1	undefined
IGA-1-29	Igapo	2018	74	2018-10-21	2019-01-03	2018-12-23	19:36:21	MAMMAL	Frugivore.Herbivore	Cuniculus	paca	Cuniculus_paca	1	undefined
IGA-1-29	Igapo	2018	74	2018-10-21	2019-01-03	2018-12-23	08:29:01	MAMMAL	Frugivore.Granivore	Dasyprocta	leporina	Dasyprocta_leporina	1	undefined
IGA-1-29	Igapo	2018	74	2018-10-21	2019-01-03	2018-12-23	13:32:50	MAMMAL	Frugivore.Granivore	Dasyprocta	leporina	Dasyprocta_leporina	1	undefined
IGA-1-29	Igapo	2018	74	2018-10-21	2019-01-03	2018-12-23	06:02:10	MAMMAL	Frugivore.Granivore	Myoprocta	acouchy	Myoprocta_acouchy	1	undefined
IGA-1-29	Igapo	2018	74	2018-10-21	2019-01-03	2018-12-23	06:25:25	MAMMAL	Frugivore.Omnivore	Nasua	nasua	Nasua_nasua	1	undefined
IGA-1-29	Igapo	2018	74	2018-10-21	2019-01-03	2018-12-22	03:34:44	MAMMAL	Frugivore.Herbivore	Cuniculus	paca	Cuniculus_paca	1	undefined
IGA-1-29	Igapo	2018	74	2018-10-21	2019-01-03	2018-12-22	20:01:50	MAMMAL	Frugivore.Herbivore	Cuniculus	paca	Cuniculus_paca	1	undefined
IGA-1-29	Igapo	2018	74	2018-10-21	2019-01-03	2018-12-22	21:21:16	MAMMAL	Frugivore.Herbivore	Cuniculus	paca	Cuniculus_paca	1	undefined
IGA-1-29	Igapo	2018	74	2018-10-21	2019-01-03	2018-12-22	08:44:33	MAMMAL	Frugivore.Granivore	Dasyprocta	leporina	Dasyprocta_leporina	1	undefined
IGA-1-29	Igapo	2018	74	2018-10-21	2019-01-03	2018-12-22	06:23:22	MAMMAL	Frugivore.Granivore	Myoprocta	acouchy	Myoprocta_acouchy	1	undefined
IGA-2-29	Igapo	2019	58	2019-10-19	2019-12-16	2019-10-28	23:04:54	MAMMAL	Frugivore.Granivore	Proechimys	spp.	Proechimys_spp.	1	undefined
IGA-2-29	Igapo	2019	58	2019-10-19	2019-12-16	2019-10-29	07:20:38	MAMMAL	Frugivore.Granivore	Dasyprocta	leporina	Dasyprocta_leporina	1	undefined
IGA-2-29	Igapo	2019	58	2019-10-19	2019-12-16	2019-10-29	16:43:08	MAMMAL	Frugivore.Granivore	Dasyprocta	leporina	Dasyprocta_leporina	2	undefined
IGA-2-29	Igapo	2019	58	2019-10-19	2019-12-16	2019-10-29	18:43:30	MAMMAL	Frugivore.Granivore	Proechimys	spp.	Proechimys_spp.	1	undefined
IGA-2-29	Igapo	2019	58	2019-10-19	2019-12-16	2019-10-30	15:41:12	MAMMAL	Frugivore.Granivore	Dasyprocta	leporina	Dasyprocta_leporina	1	undefined
IGA-2-29	Igapo	2019	58	2019-10-19	2019-12-16	2019-11-25	06:05:27	MAMMAL	Frugivore.Granivore	Dasyprocta	leporina	Dasyprocta_leporina	1	undefined
IGA-2-29	Igapo	2019	58	2019-10-19	2019-12-16	2019-10-26	16:23:08	MAMMAL	Frugivore.Granivore	Dasyprocta	leporina	Dasyprocta_leporina	1	undefined
IGA-2-29	Igapo	2019	58	2019-10-19	2019-12-16	2019-10-26	20:39:24	MAMMAL	Frugivore.Omnivore	Didelphis	marsupialis	Didelphis_marsupialis	1	undefined
IGA-2-29	Igapo	2019	58	2019-10-19	2019-12-16	2019-11-24	10:54:39	MAMMAL	Frugivore.Granivore	Dasyprocta	leporina	Dasyprocta_leporina	1	undefined
IGA-2-29	Igapo	2019	58	2019-10-19	2019-12-16	2019-11-30	00:06:20	MAMMAL	Frugivore.Herbivore	Cuniculus	paca	Cuniculus_paca	1	undefined
IGA-2-29	Igapo	2019	58	2019-10-19	2019-12-16	2019-10-25	16:22:19	MAMMAL	Frugivore.Granivore	Dasyprocta	leporina	Dasyprocta_leporina	1	undefined
IGA-2-29	Igapo	2019	58	2019-10-19	2019-12-16	2019-10-25	17:57:12	MAMMAL	Frugivore.Granivore	Myoprocta	acouchy	Myoprocta_acouchy	1	undefined
IGA-2-29	Igapo	2019	58	2019-10-19	2019-12-16	2019-10-25	02:42:26	MAMMAL	Frugivore.Granivore	Proechimys	spp.	Proechimys_spp.	1	undefined
IGA-2-29	Igapo	2019	58	2019-10-19	2019-12-16	2019-10-25	21:01:50	MAMMAL	Frugivore.Granivore	Proechimys	spp.	Proechimys_spp.	1	undefined
IGA-2-29	Igapo	2019	58	2019-10-19	2019-12-16	2019-11-23	09:38:19	MAMMAL	Frugivore.Granivore	Dasyprocta	leporina	Dasyprocta_leporina	1	undefined
IGA-2-29	Igapo	2019	58	2019-10-19	2019-12-16	2019-11-23	23:59:32	MAMMAL	Frugivore.Omnivore	Didelphis	marsupialis	Didelphis_marsupialis	1	undefined
IGA-2-29	Igapo	2019	58	2019-10-19	2019-12-16	2019-11-02	04:33:24	MAMMAL	Frugivore.Granivore	Proechimys	spp.	Proechimys_spp.	1	undefined
IGA-2-29	Igapo	2019	58	2019-10-19	2019-12-16	2019-11-22	12:52:19	MAMMAL	Frugivore.Granivore	Dasyprocta	leporina	Dasyprocta_leporina	1	undefined
IGA-2-29	Igapo	2019	58	2019-10-19	2019-12-16	2019-11-22	15:42:05	MAMMAL	Frugivore.Granivore	Dasyprocta	leporina	Dasyprocta_leporina	1	undefined
IGA-2-29	Igapo	2019	58	2019-10-19	2019-12-16	2019-12-02	04:28:06	MAMMAL	Frugivore.Omnivore	Didelphis	marsupialis	Didelphis_marsupialis	1	undefined
IGA-2-29	Igapo	2019	58	2019-10-19	2019-12-16	2019-12-02	20:41:49	MAMMAL	Frugivore.Omnivore	Didelphis	marsupialis	Didelphis_marsupialis	1	undefined
IGA-2-29	Igapo	2019	58	2019-10-19	2019-12-16	2019-11-03	21:21:48	MAMMAL	Frugivore.Omnivore	Didelphis	marsupialis	Didelphis_marsupialis	1	undefined
IGA-2-29	Igapo	2019	58	2019-10-19	2019-12-16	2019-11-03	00:29:29	MAMMAL	Frugivore.Granivore	Proechimys	spp.	Proechimys_spp.	1	undefined
IGA-2-29	Igapo	2019	58	2019-10-19	2019-12-16	2019-11-21	12:53:18	MAMMAL	Frugivore.Granivore	Dasyprocta	leporina	Dasyprocta_leporina	1	undefined
IGA-2-29	Igapo	2019	58	2019-10-19	2019-12-16	2019-11-21	17:14:36	MAMMAL	Frugivore.Granivore	Dasyprocta	leporina	Dasyprocta_leporina	1	undefined
IGA-2-29	Igapo	2019	58	2019-10-19	2019-12-16	2019-12-03	07:30:14	MAMMAL	Frugivore.Granivore	Dasyprocta	leporina	Dasyprocta_leporina	1	undefined
IGA-2-29	Igapo	2019	58	2019-10-19	2019-12-16	2019-11-04	05:37:19	MAMMAL	Frugivore.Granivore	Dasyprocta	leporina	Dasyprocta_leporina	1	undefined
IGA-2-29	Igapo	2019	58	2019-10-19	2019-12-16	2019-11-04	17:59:46	MAMMAL	Frugivore.Granivore	Dasyprocta	leporina	Dasyprocta_leporina	1	undefined
IGA-2-29	Igapo	2019	58	2019-10-19	2019-12-16	2019-11-04	01:03:17	MAMMAL	Frugivore.Omnivore	Didelphis	marsupialis	Didelphis_marsupialis	1	undefined
IGA-2-29	Igapo	2019	58	2019-10-19	2019-12-16	2019-11-05	03:31:09	MAMMAL	Frugivore.Granivore	Proechimys	spp.	Proechimys_spp.	1	undefined
IGA-2-29	Igapo	2019	58	2019-10-19	2019-12-16	2019-11-19	13:40:16	MAMMAL	Frugivore.Granivore	Dasyprocta	leporina	Dasyprocta_leporina	1	undefined
IGA-2-29	Igapo	2019	58	2019-10-19	2019-12-16	2019-10-20	14:56:28	MAMMAL	Frugivore.Granivore	Dasyprocta	leporina	Dasyprocta_leporina	1	undefined
IGA-2-29	Igapo	2019	58	2019-10-19	2019-12-16	2019-11-06	06:30:16	MAMMAL	Frugivore.Granivore	Dasyprocta	leporina	Dasyprocta_leporina	1	undefined
IGA-2-29	Igapo	2019	58	2019-10-19	2019-12-16	2019-11-06	03:49:41	MAMMAL	Frugivore.Omnivore	Didelphis	marsupialis	Didelphis_marsupialis	1	undefined
IGA-2-29	Igapo	2019	58	2019-10-19	2019-12-16	2019-12-06	08:41:47	MAMMAL	Frugivore.Granivore	Dasyprocta	leporina	Dasyprocta_leporina	1	undefined
IGA-2-29	Igapo	2019	58	2019-10-19	2019-12-16	2019-12-06	02:22:10	MAMMAL	Frugivore.Granivore	Proechimys	spp.	Proechimys_spp.	1	undefined
IGA-2-29	Igapo	2019	58	2019-10-19	2019-12-16	2019-10-19	10:04:24	INSTALL	Setup	Setup	Setup	Setup	1	undefined
IGA-2-29	Igapo	2019	58	2019-10-19	2019-12-16	2019-11-07	04:25:35	MAMMAL	Frugivore.Granivore	Proechimys	spp.	Proechimys_spp.	1	undefined
IGA-2-29	Igapo	2019	58	2019-10-19	2019-12-16	2019-11-17	01:14:11	MAMMAL	Frugivore.Omnivore	Didelphis	marsupialis	Didelphis_marsupialis	1	undefined
IGA-2-29	Igapo	2019	58	2019-10-19	2019-12-16	2019-11-17	18:51:49	MAMMAL	Frugivore.Omnivore	Didelphis	marsupialis	Didelphis_marsupialis	1	undefined
IGA-2-29	Igapo	2019	58	2019-10-19	2019-12-16	2019-12-07	07:10:10	MAMMAL	Frugivore.Granivore	Dasyprocta	leporina	Dasyprocta_leporina	1	undefined
IGA-2-29	Igapo	2019	58	2019-10-19	2019-12-16	2019-12-07	08:43:01	MAMMAL	Frugivore.Granivore	Dasyprocta	leporina	Dasyprocta_leporina	1	undefined
IGA-2-29	Igapo	2019	58	2019-10-19	2019-12-16	2019-12-16	08:19:30	MAMMAL	Frugivore.Granivore	Dasyprocta	leporina	Dasyprocta_leporina	1	undefined
IGA-2-29	Igapo	2019	58	2019-10-19	2019-12-16	2019-12-16	10:49:15	INSTALL	Retrieval	Retrieval	Retrieval	Pickup	1	undefined
IGA-2-29	Igapo	2019	58	2019-10-19	2019-12-16	2019-11-08	09:31:39	MAMMAL	Frugivore.Granivore	Dasyprocta	leporina	Dasyprocta_leporina	1	undefined
IGA-2-29	Igapo	2019	58	2019-10-19	2019-12-16	2019-11-16	18:11:12	MAMMAL	Frugivore.Granivore	Dasyprocta	leporina	Dasyprocta_leporina	1	undefined
IGA-2-29	Igapo	2019	58	2019-10-19	2019-12-16	2019-11-16	20:13:19	MAMMAL	Frugivore.Omnivore	Didelphis	marsupialis	Didelphis_marsupialis	1	undefined
IGA-2-29	Igapo	2019	58	2019-10-19	2019-12-16	2019-11-16	21:42:17	MAMMAL	Frugivore.Omnivore	Didelphis	marsupialis	Didelphis_marsupialis	1	undefined
IGA-2-29	Igapo	2019	58	2019-10-19	2019-12-16	2019-11-16	19:19:31	MAMMAL	Frugivore.Herbivore	Mazama	americana	Mazama_americana	1	Male
IGA-2-29	Igapo	2019	58	2019-10-19	2019-12-16	2019-12-08	17:18:56	MAMMAL	Frugivore.Herbivore	Mazama	nemorivaga	Mazama_nemorivaga	1	Female
IGA-2-29	Igapo	2019	58	2019-10-19	2019-12-16	2019-12-15	17:27:49	MAMMAL	Frugivore.Granivore	Dasyprocta	leporina	Dasyprocta_leporina	1	undefined
IGA-2-29	Igapo	2019	58	2019-10-19	2019-12-16	2019-11-09	15:56:53	MAMMAL	Frugivore.Granivore	Dasyprocta	leporina	Dasyprocta_leporina	1	undefined
IGA-2-29	Igapo	2019	58	2019-10-19	2019-12-16	2019-11-15	01:53:47	MAMMAL	Frugivore.Omnivore	Didelphis	marsupialis	Didelphis_marsupialis	1	undefined
IGA-2-29	Igapo	2019	58	2019-10-19	2019-12-16	2019-11-15	03:58:08	MAMMAL	Frugivore.Omnivore	Didelphis	marsupialis	Didelphis_marsupialis	1	undefined
IGA-2-29	Igapo	2019	58	2019-10-19	2019-12-16	2019-11-15	23:48:52	MAMMAL	Frugivore.Omnivore	Didelphis	marsupialis	Didelphis_marsupialis	1	undefined
IGA-2-29	Igapo	2019	58	2019-10-19	2019-12-16	2019-11-15	20:15:45	MAMMAL	Frugivore.Herbivore	Mazama	americana	Mazama_americana	1	Male
IGA-2-29	Igapo	2019	58	2019-10-19	2019-12-16	2019-12-09	13:08:12	MAMMAL	nodata	Sapajus	apella	Sapajus_apella	3	undefined
IGA-2-29	Igapo	2019	58	2019-10-19	2019-12-16	2019-12-14	20:03:11	MAMMAL	Frugivore.Herbivore	Cuniculus	paca	Cuniculus_paca	1	undefined
IGA-2-29	Igapo	2019	58	2019-10-19	2019-12-16	2019-12-14	20:53:53	MAMMAL	Frugivore.Granivore	Proechimys	spp.	Proechimys_spp.	1	undefined
IGA-2-29	Igapo	2019	58	2019-10-19	2019-12-16	2019-11-10	19:50:04	MAMMAL	Frugivore.Omnivore	Didelphis	marsupialis	Didelphis_marsupialis	1	undefined
IGA-2-29	Igapo	2019	58	2019-10-19	2019-12-16	2019-12-10	01:44:41	MAMMAL	Frugivore.Omnivore	Didelphis	marsupialis	Didelphis_marsupialis	1	undefined
IGA-2-29	Igapo	2019	58	2019-10-19	2019-12-16	2019-12-13	17:33:10	MAMMAL	Frugivore.Granivore	Dasyprocta	leporina	Dasyprocta_leporina	1	undefined
IGA-2-29	Igapo	2019	58	2019-10-19	2019-12-16	2019-11-13	05:10:29	MAMMAL	Frugivore.Granivore	Dasyprocta	leporina	Dasyprocta_leporina	1	undefined
IGA-2-29	Igapo	2019	58	2019-10-19	2019-12-16	2019-11-13	18:06:50	MAMMAL	Frugivore.Omnivore	Nasua	nasua	Nasua_nasua	31	undefined
IGA-2-29	Igapo	2019	58	2019-10-19	2019-12-16	2019-12-11	07:15:29	MAMMAL	Frugivore.Granivore	Dasyprocta	leporina	Dasyprocta_leporina	1	undefined
IGA-2-29	Igapo	2019	58	2019-10-19	2019-12-16	2019-12-11	17:35:41	MAMMAL	Frugivore.Granivore	Dasyprocta	leporina	Dasyprocta_leporina	1	undefined
IGA-2-29	Igapo	2019	58	2019-10-19	2019-12-16	2019-12-12	15:45:15	MAMMAL	Frugivore.Granivore	Dasyprocta	leporina	Dasyprocta_leporina	1	undefined
IGA-2-29	Igapo	2019	58	2019-10-19	2019-12-16	2019-12-12	02:47:37	MAMMAL	Frugivore.Omnivore	Didelphis	marsupialis	Didelphis_marsupialis	1	undefined
IGA-2-29	Igapo	2019	58	2019-10-19	2019-12-16	2019-11-12	13:49:19	MAMMAL	Frugivore.Granivore	Dasyprocta	leporina	Dasyprocta_leporina	1	undefined
IGA-1-30	Igapo	2018	76	2018-10-21	2019-01-05	2019-01-05	11:39:57	INSTALL	Retrieval	Retrieval	Retrieval	Pickup	1	undefined
IGA-1-30	Igapo	2018	76	2018-10-21	2019-01-05	2018-11-15	16:16:55	MAMMAL	Frugivore.Herbivore	Mazama	nemorivaga	Mazama_nemorivaga	1	undefined
IGA-1-30	Igapo	2018	76	2018-10-21	2019-01-05	2018-10-21	12:13:48	INSTALL	Setup	Setup	Setup	Setup	1	undefined
IGA-1-30	Igapo	2018	76	2018-10-21	2019-01-05	2018-12-25	05:42:29	MAMMAL	Carnivore	Puma	yagouaroundi	Puma_yagouaroundi	1	undefined
IGA-2-30	Igapo	2019	58	2019-10-19	2019-12-16	2019-10-29	03:05:41	MAMMAL	Frugivore.Omnivore	Didelphis	marsupialis	Didelphis_marsupialis	1	undefined
IGA-2-30	Igapo	2019	58	2019-10-19	2019-12-16	2019-10-20	19:11:06	MAMMAL	Frugivore.Omnivore	Didelphis	marsupialis	Didelphis_marsupialis	1	undefined
IGA-2-30	Igapo	2019	58	2019-10-19	2019-12-16	2019-10-19	09:36:28	INSTALL	Setup	Setup	Setup	Setup	1	undefined
IGA-2-30	Igapo	2019	58	2019-10-19	2019-12-16	2019-12-16	10:42:02	INSTALL	Retrieval	Retrieval	Retrieval	Pickup	1	undefined
IGA-1-31	Igapo	2018	74	2018-10-21	2019-01-03	2018-12-07	00:02:53	MAMMAL	Frugivore.Herbivore	Cuniculus	paca	Cuniculus_paca	1	undefined
IGA-1-31	Igapo	2018	74	2018-10-21	2019-01-03	2018-12-07	20:25:08	MAMMAL	Frugivore.Granivore	Proechimys	spp.	Proechimys_spp.	1	undefined
IGA-1-31	Igapo	2018	74	2018-10-21	2019-01-03	2018-11-09	05:48:11	MAMMAL	Frugivore.Granivore	Dasyprocta	leporina	Dasyprocta_leporina	1	undefined
IGA-1-31	Igapo	2018	74	2018-10-21	2019-01-03	2018-12-06	23:26:53	MAMMAL	Insectivore.Omnivore	Metachirus	nudicaudatus	Metachirus_nudicaudatus	1	undefined
IGA-1-31	Igapo	2018	74	2018-10-21	2019-01-03	2018-12-09	18:05:20	MAMMAL	Frugivore.Granivore	Myoprocta	acouchy	Myoprocta_acouchy	1	undefined
IGA-1-31	Igapo	2018	74	2018-10-21	2019-01-03	2018-11-06	07:46:10	MAMMAL	Frugivore.Granivore	Dasyprocta	leporina	Dasyprocta_leporina	1	undefined
IGA-1-31	Igapo	2018	74	2018-10-21	2019-01-03	2018-11-06	17:07:19	MAMMAL	Carnivore	Leopardus	pardalis	Leopardus_pardalis	1	undefined
IGA-1-31	Igapo	2018	74	2018-10-21	2019-01-03	2018-11-10	07:20:24	MAMMAL	Frugivore.Granivore	Dasyprocta	leporina	Dasyprocta_leporina	1	undefined
IGA-1-31	Igapo	2018	74	2018-10-21	2019-01-03	2018-12-10	00:14:04	MAMMAL	Insectivore.Omnivore	Metachirus	nudicaudatus	Metachirus_nudicaudatus	1	undefined
IGA-1-31	Igapo	2018	74	2018-10-21	2019-01-03	2018-11-05	03:33:55	MAMMAL	Insectivore.Omnivore	Metachirus	nudicaudatus	Metachirus_nudicaudatus	1	undefined
IGA-1-31	Igapo	2018	74	2018-10-21	2019-01-03	2019-01-03	12:49:45	INSTALL	Retrieval	Retrieval	Retrieval	Pickup	1	undefined
IGA-1-31	Igapo	2018	74	2018-10-21	2019-01-03	2018-12-11	18:37:31	MAMMAL	Insectivore.Omnivore	Metachirus	nudicaudatus	Metachirus_nudicaudatus	1	undefined
IGA-1-31	Igapo	2018	74	2018-10-21	2019-01-03	2018-11-04	02:14:07	MAMMAL	Insectivore.Omnivore	Metachirus	nudicaudatus	Metachirus_nudicaudatus	1	undefined
IGA-1-31	Igapo	2018	74	2018-10-21	2019-01-03	2019-01-02	16:39:17	MAMMAL	Frugivore.Granivore	Dasyprocta	leporina	Dasyprocta_leporina	1	undefined
IGA-1-31	Igapo	2018	74	2018-10-21	2019-01-03	2018-12-12	05:58:19	MAMMAL	Frugivore.Granivore	Dasyprocta	leporina	Dasyprocta_leporina	1	undefined
IGA-1-31	Igapo	2018	74	2018-10-21	2019-01-03	2018-12-12	10:12:16	MAMMAL	Frugivore.Granivore	Dasyprocta	leporina	Dasyprocta_leporina	1	undefined
IGA-1-31	Igapo	2018	74	2018-10-21	2019-01-03	2018-12-12	18:08:04	MAMMAL	Frugivore.Granivore	Myoprocta	acouchy	Myoprocta_acouchy	1	undefined
IGA-1-31	Igapo	2018	74	2018-10-21	2019-01-03	2018-11-03	06:40:44	MAMMAL	Frugivore.Omnivore	Eira	barbara	Eira_barbara	1	undefined
IGA-1-31	Igapo	2018	74	2018-10-21	2019-01-03	2018-11-13	10:53:03	MAMMAL	Frugivore.Omnivore	Nasua	nasua	Nasua_nasua	1	undefined
IGA-1-31	Igapo	2018	74	2018-10-21	2019-01-03	2018-12-02	05:59:58	MAMMAL	Frugivore.Granivore	Dasyprocta	leporina	Dasyprocta_leporina	1	undefined
IGA-1-31	Igapo	2018	74	2018-10-21	2019-01-03	2018-11-02	20:29:01	MAMMAL	Insectivore.Omnivore	Metachirus	nudicaudatus	Metachirus_nudicaudatus	1	undefined
IGA-1-31	Igapo	2018	74	2018-10-21	2019-01-03	2018-12-31	09:38:06	MAMMAL	Frugivore.Granivore	Dasyprocta	leporina	Dasyprocta_leporina	1	undefined
IGA-1-31	Igapo	2018	74	2018-10-21	2019-01-03	2018-12-31	19:30:44	MAMMAL	Insectivore.Omnivore	Philander	opossum	Philander_opossum	1	undefined
IGA-1-31	Igapo	2018	74	2018-10-21	2019-01-03	2018-11-01	17:36:33	MAMMAL	Carnivore	Leopardus	pardalis	Leopardus_pardalis	1	undefined
IGA-1-31	Igapo	2018	74	2018-10-21	2019-01-03	2018-12-30	11:09:59	MAMMAL	nodata	Saimiri	sciureus	Saimiri_sciureus	1	undefined
IGA-1-31	Igapo	2018	74	2018-10-21	2019-01-03	2018-12-30	11:06:54	MAMMAL	nodata	Sapajus	apella	Sapajus_apella	1	undefined
IGA-1-31	Igapo	2018	74	2018-10-21	2019-01-03	2018-12-15	22:05:02	MAMMAL	Insectivore.Omnivore	Metachirus	nudicaudatus	Metachirus_nudicaudatus	1	undefined
IGA-1-31	Igapo	2018	74	2018-10-21	2019-01-03	2018-10-31	10:00:37	MAMMAL	Frugivore.Granivore	Dasyprocta	leporina	Dasyprocta_leporina	1	undefined
IGA-1-31	Igapo	2018	74	2018-10-21	2019-01-03	2018-11-16	09:44:01	MAMMAL	Insectivore	Myrmecophaga	tridactyla	Myrmecophaga_tridactyla	1	undefined
IGA-1-31	Igapo	2018	74	2018-10-21	2019-01-03	2018-12-28	19:19:40	MAMMAL	Insectivore.Omnivore	Philander	opossum	Philander_opossum	1	undefined
IGA-1-31	Igapo	2018	74	2018-10-21	2019-01-03	2018-11-28	15:21:33	MAMMAL	Frugivore.Granivore	Dasyprocta	leporina	Dasyprocta_leporina	1	undefined
IGA-1-31	Igapo	2018	74	2018-10-21	2019-01-03	2018-12-17	01:36:01	MAMMAL	Insectivore.Omnivore	Metachirus	nudicaudatus	Metachirus_nudicaudatus	1	undefined
IGA-1-31	Igapo	2018	74	2018-10-21	2019-01-03	2018-12-27	22:07:05	MAMMAL	Insectivore.Omnivore	Metachirus	nudicaudatus	Metachirus_nudicaudatus	1	undefined
IGA-1-31	Igapo	2018	74	2018-10-21	2019-01-03	2018-11-27	13:07:31	MAMMAL	Insectivore	Myrmecophaga	tridactyla	Myrmecophaga_tridactyla	1	undefined
IGA-1-31	Igapo	2018	74	2018-10-21	2019-01-03	2018-12-26	23:11:13	MAMMAL	Insectivore.Omnivore	Philander	opossum	Philander_opossum	1	undefined
IGA-1-31	Igapo	2018	74	2018-10-21	2019-01-03	2018-12-19	01:47:17	MAMMAL	Insectivore.Omnivore	Metachirus	nudicaudatus	Metachirus_nudicaudatus	1	undefined
IGA-1-31	Igapo	2018	74	2018-10-21	2019-01-03	2018-10-21	10:43:55	INSTALL	Setup	Setup	Setup	Setup	1	undefined
IGA-1-31	Igapo	2018	74	2018-10-21	2019-01-03	2018-12-20	17:03:45	MAMMAL	Frugivore.Granivore	Dasyprocta	leporina	Dasyprocta_leporina	1	undefined
IGA-1-31	Igapo	2018	74	2018-10-21	2019-01-03	2018-10-26	06:31:48	MAMMAL	Frugivore.Granivore	Dasyprocta	leporina	Dasyprocta_leporina	1	undefined
IGA-1-31	Igapo	2018	74	2018-10-21	2019-01-03	2018-12-24	19:02:02	MAMMAL	Insectivore.Omnivore	Metachirus	nudicaudatus	Metachirus_nudicaudatus	1	undefined
IGA-1-31	Igapo	2018	74	2018-10-21	2019-01-03	2018-12-24	20:12:54	MAMMAL	Insectivore.Omnivore	Metachirus	nudicaudatus	Metachirus_nudicaudatus	1	undefined
IGA-1-31	Igapo	2018	74	2018-10-21	2019-01-03	2018-11-21	17:05:37	MAMMAL	Frugivore.Granivore	Myoprocta	acouchy	Myoprocta_acouchy	1	undefined
IGA-1-31	Igapo	2018	74	2018-10-21	2019-01-03	2018-12-21	01:33:14	MAMMAL	Insectivore.Omnivore	Metachirus	nudicaudatus	Metachirus_nudicaudatus	1	undefined
IGA-1-31	Igapo	2018	74	2018-10-21	2019-01-03	2018-12-21	12:31:06	MAMMAL	Frugivore.Granivore	Myoprocta	acouchy	Myoprocta_acouchy	1	undefined
IGA-1-31	Igapo	2018	74	2018-10-21	2019-01-03	2018-10-23	07:17:33	MAMMAL	Frugivore.Granivore	Dasyprocta	leporina	Dasyprocta_leporina	1	undefined
IGA-1-31	Igapo	2018	74	2018-10-21	2019-01-03	2018-12-23	20:30:18	MAMMAL	Insectivore.Omnivore	Metachirus	nudicaudatus	Metachirus_nudicaudatus	1	undefined
IGA-1-31	Igapo	2018	74	2018-10-21	2019-01-03	2018-12-22	13:01:20	MAMMAL	Frugivore.Herbivore	Mazama	nemorivaga	Mazama_nemorivaga	1	undefined
IGA-2-31	Igapo	2019	58	2019-10-19	2019-12-16	2019-11-27	14:40:59	MAMMAL	Frugivore.Granivore	Dasyprocta	leporina	Dasyprocta_leporina	1	undefined
IGA-2-31	Igapo	2019	58	2019-10-19	2019-12-16	2019-10-28	05:43:49	MAMMAL	Frugivore.Granivore	Myoprocta	acouchy	Myoprocta_acouchy	1	undefined
IGA-2-31	Igapo	2019	58	2019-10-19	2019-12-16	2019-10-29	17:31:17	MAMMAL	Frugivore.Granivore	Dasyprocta	leporina	Dasyprocta_leporina	1	undefined
IGA-2-31	Igapo	2019	58	2019-10-19	2019-12-16	2019-11-25	17:27:06	MAMMAL	Frugivore.Granivore	Dasyprocta	leporina	Dasyprocta_leporina	1	undefined
IGA-2-31	Igapo	2019	58	2019-10-19	2019-12-16	2019-10-26	18:01:18	MAMMAL	Frugivore.Granivore	Dasyprocta	leporina	Dasyprocta_leporina	1	undefined
IGA-2-31	Igapo	2019	58	2019-10-19	2019-12-16	2019-10-26	17:50:11	MAMMAL	Frugivore.Granivore	Myoprocta	acouchy	Myoprocta_acouchy	1	undefined
IGA-2-31	Igapo	2019	58	2019-10-19	2019-12-16	2019-11-24	05:46:09	MAMMAL	Frugivore.Granivore	Dasyprocta	leporina	Dasyprocta_leporina	1	undefined
IGA-2-31	Igapo	2019	58	2019-10-19	2019-12-16	2019-11-01	05:30:23	MAMMAL	Frugivore.Granivore	Myoprocta	acouchy	Myoprocta_acouchy	1	undefined
IGA-2-31	Igapo	2019	58	2019-10-19	2019-12-16	2019-11-23	13:01:12	MAMMAL	Frugivore.Granivore	Dasyprocta	leporina	Dasyprocta_leporina	1	undefined
IGA-2-31	Igapo	2019	58	2019-10-19	2019-12-16	2019-12-01	17:54:53	MAMMAL	Frugivore.Granivore	Dasyprocta	leporina	Dasyprocta_leporina	1	undefined
IGA-2-31	Igapo	2019	58	2019-10-19	2019-12-16	2019-11-02	06:32:15	MAMMAL	Frugivore.Granivore	Dasyprocta	leporina	Dasyprocta_leporina	1	undefined
IGA-2-31	Igapo	2019	58	2019-10-19	2019-12-16	2019-10-23	17:23:05	MAMMAL	Frugivore.Granivore	Dasyprocta	leporina	Dasyprocta_leporina	1	undefined
IGA-2-31	Igapo	2019	58	2019-10-19	2019-12-16	2019-11-03	10:57:58	MAMMAL	Frugivore.Granivore	Dasyprocta	leporina	Dasyprocta_leporina	1	undefined
IGA-2-31	Igapo	2019	58	2019-10-19	2019-12-16	2019-11-03	14:19:24	MAMMAL	Frugivore.Granivore	Dasyprocta	leporina	Dasyprocta_leporina	1	undefined
IGA-2-31	Igapo	2019	58	2019-10-19	2019-12-16	2019-11-20	17:18:56	MAMMAL	Frugivore.Granivore	Dasyprocta	leporina	Dasyprocta_leporina	1	undefined
IGA-2-31	Igapo	2019	58	2019-10-19	2019-12-16	2019-11-20	12:50:24	MAMMAL	Frugivore.Granivore	Myoprocta	acouchy	Myoprocta_acouchy	1	undefined
IGA-2-31	Igapo	2019	58	2019-10-19	2019-12-16	2019-10-21	16:30:24	MAMMAL	Frugivore.Granivore	Dasyprocta	leporina	Dasyprocta_leporina	1	undefined
IGA-2-31	Igapo	2019	58	2019-10-19	2019-12-16	2019-11-05	11:48:00	MAMMAL	Frugivore.Granivore	Dasyprocta	leporina	Dasyprocta_leporina	1	undefined
IGA-2-31	Igapo	2019	58	2019-10-19	2019-12-16	2019-11-05	13:24:44	MAMMAL	Frugivore.Granivore	Dasyprocta	leporina	Dasyprocta_leporina	1	undefined
IGA-2-31	Igapo	2019	58	2019-10-19	2019-12-16	2019-10-20	06:31:40	MAMMAL	Frugivore.Granivore	Dasyprocta	leporina	Dasyprocta_leporina	1	undefined
IGA-2-31	Igapo	2019	58	2019-10-19	2019-12-16	2019-11-06	04:08:31	MAMMAL	Frugivore.Granivore	Proechimys	spp.	Proechimys_spp.	1	undefined
IGA-2-31	Igapo	2019	58	2019-10-19	2019-12-16	2019-11-18	18:55:12	MAMMAL	Insectivore.Omnivore	Philander	opossum	Philander_opossum	1	undefined
IGA-2-31	Igapo	2019	58	2019-10-19	2019-12-16	2019-10-19	08:36:53	INSTALL	Setup	Setup	Setup	Setup	1	undefined
IGA-2-31	Igapo	2019	58	2019-10-19	2019-12-16	2019-11-17	12:15:04	MAMMAL	Frugivore.Granivore	Dasyprocta	leporina	Dasyprocta_leporina	1	undefined
IGA-2-31	Igapo	2019	58	2019-10-19	2019-12-16	2019-11-17	21:39:27	MAMMAL	Insectivore.Omnivore	Philander	opossum	Philander_opossum	1	undefined
IGA-2-31	Igapo	2019	58	2019-10-19	2019-12-16	2019-12-07	01:36:21	MAMMAL	Frugivore.Granivore	Proechimys	spp.	Proechimys_spp.	1	undefined
IGA-2-31	Igapo	2019	58	2019-10-19	2019-12-16	2019-12-07	02:49:08	MAMMAL	Insectivore	Tamandua	tetradactyla	Tamandua_tetradactyla	1	undefined
IGA-2-31	Igapo	2019	58	2019-10-19	2019-12-16	2019-12-16	10:16:32	INSTALL	Retrieval	Retrieval	Retrieval	Pickup	1	undefined
IGA-2-31	Igapo	2019	58	2019-10-19	2019-12-16	2019-11-08	05:25:13	MAMMAL	Frugivore.Granivore	Myoprocta	acouchy	Myoprocta_acouchy	1	undefined
IGA-2-31	Igapo	2019	58	2019-10-19	2019-12-16	2019-11-16	09:10:31	MAMMAL	Frugivore.Omnivore	Nasua	nasua	Nasua_nasua	2	undefined
IGA-2-31	Igapo	2019	58	2019-10-19	2019-12-16	2019-11-10	10:55:20	MAMMAL	Frugivore.Granivore	Dasyprocta	leporina	Dasyprocta_leporina	1	undefined
IGA-2-31	Igapo	2019	58	2019-10-19	2019-12-16	2019-11-14	05:49:02	MAMMAL	Frugivore.Granivore	Dasyprocta	leporina	Dasyprocta_leporina	1	undefined
IGA-2-31	Igapo	2019	58	2019-10-19	2019-12-16	2019-11-14	13:30:09	MAMMAL	Frugivore.Granivore	Dasyprocta	leporina	Dasyprocta_leporina	1	undefined
IGA-2-31	Igapo	2019	58	2019-10-19	2019-12-16	2019-12-10	11:15:34	MAMMAL	Frugivore.Granivore	Dasyprocta	leporina	Dasyprocta_leporina	1	undefined
IGA-2-31	Igapo	2019	58	2019-10-19	2019-12-16	2019-12-13	06:53:29	MAMMAL	Carnivore	Leopardus	pardalis	Leopardus_pardalis	1	undefined
IGA-2-31	Igapo	2019	58	2019-10-19	2019-12-16	2019-11-11	10:58:46	MAMMAL	Frugivore.Granivore	Dasyprocta	leporina	Dasyprocta_leporina	1	undefined
IGA-2-31	Igapo	2019	58	2019-10-19	2019-12-16	2019-11-13	06:18:40	MAMMAL	Frugivore.Granivore	Dasyprocta	leporina	Dasyprocta_leporina	1	undefined
IGA-1-32	Igapo	2018	74	2018-10-21	2019-01-03	2018-11-07	11:33:54	MAMMAL	Frugivore.Herbivore	Mazama	nemorivaga	Mazama_nemorivaga	1	undefined
IGA-1-32	Igapo	2018	74	2018-10-21	2019-01-03	2018-12-10	17:00:24	MAMMAL	Frugivore.Granivore	Dasyprocta	leporina	Dasyprocta_leporina	1	undefined
IGA-1-32	Igapo	2018	74	2018-10-21	2019-01-03	2018-12-10	06:36:21	MAMMAL	Frugivore.Omnivore	Eira	barbara	Eira_barbara	1	undefined
IGA-1-32	Igapo	2018	74	2018-10-21	2019-01-03	2018-12-10	09:16:31	MAMMAL	Frugivore.Omnivore	Eira	barbara	Eira_barbara	1	undefined
IGA-1-32	Igapo	2018	74	2018-10-21	2019-01-03	2019-01-03	05:19:48	MAMMAL	Frugivore.Granivore	Proechimys	spp.	Proechimys_spp.	1	undefined
IGA-1-32	Igapo	2018	74	2018-10-21	2019-01-03	2019-01-03	12:50:10	INSTALL	Retrieval	Retrieval	Retrieval	Pickup	1	undefined
IGA-1-32	Igapo	2018	74	2018-10-21	2019-01-03	2018-11-04	16:53:21	MAMMAL	Frugivore.Granivore	Dasyprocta	leporina	Dasyprocta_leporina	1	undefined
IGA-1-32	Igapo	2018	74	2018-10-21	2019-01-03	2018-11-04	22:03:37	MAMMAL	Insectivore.Omnivore	Philander	opossum	Philander_opossum	1	undefined
IGA-1-32	Igapo	2018	74	2018-10-21	2019-01-03	2018-11-04	23:55:50	MAMMAL	Insectivore.Omnivore	Philander	opossum	Philander_opossum	1	undefined
IGA-1-32	Igapo	2018	74	2018-10-21	2019-01-03	2019-01-02	03:52:44	MAMMAL	Insectivore.Omnivore	Philander	opossum	Philander_opossum	1	undefined
IGA-1-32	Igapo	2018	74	2018-10-21	2019-01-03	2019-01-01	01:10:58	MAMMAL	Insectivore.Omnivore	Philander	opossum	Philander_opossum	1	undefined
IGA-1-32	Igapo	2018	74	2018-10-21	2019-01-03	2018-12-01	22:08:50	MAMMAL	Insectivore.Omnivore	Philander	opossum	Philander_opossum	1	undefined
IGA-1-32	Igapo	2018	74	2018-10-21	2019-01-03	2018-12-30	00:53:38	MAMMAL	Insectivore.Omnivore	Philander	opossum	Philander_opossum	1	undefined
IGA-1-32	Igapo	2018	74	2018-10-21	2019-01-03	2018-12-15	04:26:25	MAMMAL	Insectivore.Omnivore	Philander	opossum	Philander_opossum	1	undefined
IGA-1-32	Igapo	2018	74	2018-10-21	2019-01-03	2018-11-18	06:52:33	MAMMAL	Frugivore.Granivore	Dasyprocta	leporina	Dasyprocta_leporina	1	undefined
IGA-1-32	Igapo	2018	74	2018-10-21	2019-01-03	2018-12-26	19:00:55	MAMMAL	Frugivore.Granivore	Proechimys	spp.	Proechimys_spp.	1	undefined
IGA-1-32	Igapo	2018	74	2018-10-21	2019-01-03	2018-10-21	11:22:31	INSTALL	Setup	Setup	Setup	Setup	1	undefined
IGA-1-32	Igapo	2018	74	2018-10-21	2019-01-03	2018-10-26	05:12:28	MAMMAL	Frugivore.Granivore	Proechimys	spp.	Proechimys_spp.	1	undefined
IGA-1-32	Igapo	2018	74	2018-10-21	2019-01-03	2018-11-23	17:18:53	MAMMAL	Frugivore.Granivore	Dasyprocta	leporina	Dasyprocta_leporina	1	undefined
IGA-2-32	Igapo	2019	58	2019-10-19	2019-12-16	2019-11-27	07:50:04	MAMMAL	Frugivore.Herbivore	Dicotyles	tajacu	Dicotyles_tajacu	1	undefined
IGA-2-32	Igapo	2019	58	2019-10-19	2019-12-16	2019-10-28	05:03:26	MAMMAL	Carnivore	Leopardus	wiedii	Leopardus_wiedii	1	Male
IGA-2-32	Igapo	2019	58	2019-10-19	2019-12-16	2019-10-30	03:14:41	MAMMAL	Frugivore.Herbivore	Cuniculus	paca	Cuniculus_paca	1	undefined
IGA-2-32	Igapo	2019	58	2019-10-19	2019-12-16	2019-10-30	22:29:03	MAMMAL	Frugivore.Omnivore	Didelphis	marsupialis	Didelphis_marsupialis	1	undefined
IGA-2-32	Igapo	2019	58	2019-10-19	2019-12-16	2019-11-30	21:18:27	MAMMAL	Frugivore.Granivore	Proechimys	spp.	Proechimys_spp.	1	undefined
IGA-2-32	Igapo	2019	58	2019-10-19	2019-12-16	2019-11-30	03:05:07	MAMMAL	Insectivore	Tamandua	tetradactyla	Tamandua_tetradactyla	2	undefined
IGA-2-32	Igapo	2019	58	2019-10-19	2019-12-16	2019-11-21	15:31:32	MAMMAL	Frugivore.Granivore	Dasyprocta	leporina	Dasyprocta_leporina	1	undefined
IGA-2-32	Igapo	2019	58	2019-10-19	2019-12-16	2019-12-03	23:13:40	MAMMAL	Frugivore.Granivore	Proechimys	spp.	Proechimys_spp.	1	undefined
IGA-2-32	Igapo	2019	58	2019-10-19	2019-12-16	2019-11-04	02:42:01	MAMMAL	Frugivore.Omnivore	Didelphis	marsupialis	Didelphis_marsupialis	1	undefined
IGA-2-32	Igapo	2019	58	2019-10-19	2019-12-16	2019-10-21	11:55:46	MAMMAL	Frugivore.Granivore	Dasyprocta	leporina	Dasyprocta_leporina	1	undefined
IGA-2-32	Igapo	2019	58	2019-10-19	2019-12-16	2019-12-05	12:54:18	MAMMAL	Frugivore.Granivore	Dasyprocta	leporina	Dasyprocta_leporina	1	undefined
IGA-2-32	Igapo	2019	58	2019-10-19	2019-12-16	2019-12-05	00:07:46	MAMMAL	Frugivore.Omnivore	Didelphis	marsupialis	Didelphis_marsupialis	1	undefined
IGA-2-32	Igapo	2019	58	2019-10-19	2019-12-16	2019-10-20	22:55:51	MAMMAL	Frugivore.Herbivore	Cuniculus	paca	Cuniculus_paca	1	undefined
IGA-2-32	Igapo	2019	58	2019-10-19	2019-12-16	2019-10-20	20:39:11	MAMMAL	Frugivore.Omnivore	Didelphis	marsupialis	Didelphis_marsupialis	1	undefined
IGA-2-32	Igapo	2019	58	2019-10-19	2019-12-16	2019-12-06	20:15:40	MAMMAL	Frugivore.Omnivore	Didelphis	marsupialis	Didelphis_marsupialis	1	undefined
IGA-2-32	Igapo	2019	58	2019-10-19	2019-12-16	2019-10-19	19:59:35	MAMMAL	Frugivore.Omnivore	Didelphis	marsupialis	Didelphis_marsupialis	1	undefined
IGA-2-32	Igapo	2019	58	2019-10-19	2019-12-16	2019-10-19	09:12:14	INSTALL	Setup	Setup	Setup	Setup	1	undefined
IGA-2-32	Igapo	2019	58	2019-10-19	2019-12-16	2019-11-17	06:30:34	MAMMAL	Frugivore.Granivore	Dasyprocta	leporina	Dasyprocta_leporina	1	undefined
IGA-2-32	Igapo	2019	58	2019-10-19	2019-12-16	2019-12-16	10:36:01	INSTALL	Retrieval	Retrieval	Retrieval	Pickup	1	undefined
IGA-2-32	Igapo	2019	58	2019-10-19	2019-12-16	2019-11-08	14:47:35	MAMMAL	Frugivore.Granivore	Dasyprocta	leporina	Dasyprocta_leporina	1	undefined
IGA-2-32	Igapo	2019	58	2019-10-19	2019-12-16	2019-12-09	04:08:29	MAMMAL	Frugivore.Omnivore	Didelphis	marsupialis	Didelphis_marsupialis	1	undefined
IGA-2-32	Igapo	2019	58	2019-10-19	2019-12-16	2019-12-09	19:23:57	MAMMAL	Frugivore.Omnivore	Didelphis	marsupialis	Didelphis_marsupialis	1	undefined
IGA-2-32	Igapo	2019	58	2019-10-19	2019-12-16	2019-12-11	17:32:16	MAMMAL	Carnivore	Panthera	onca	Panthera_onca	1	undefined
IGA-1-33	Igapo	2018	74	2018-10-21	2019-01-03	2018-11-08	17:22:44	MAMMAL	Frugivore.Granivore	Myoprocta	acouchy	Myoprocta_acouchy	1	undefined
IGA-1-33	Igapo	2018	74	2018-10-21	2019-01-03	2018-12-08	06:08:51	MAMMAL	Frugivore.Granivore	Dasyprocta	leporina	Dasyprocta_leporina	1	undefined
IGA-1-33	Igapo	2018	74	2018-10-21	2019-01-03	2018-12-08	18:03:35	MAMMAL	Frugivore.Granivore	Myoprocta	acouchy	Myoprocta_acouchy	1	undefined
IGA-1-33	Igapo	2018	74	2018-10-21	2019-01-03	2018-11-09	13:26:47	MAMMAL	Frugivore.Granivore	Dasyprocta	leporina	Dasyprocta_leporina	1	undefined
IGA-1-33	Igapo	2018	74	2018-10-21	2019-01-03	2018-12-06	02:56:16	MAMMAL	Insectivore.Omnivore	Philander	opossum	Philander_opossum	1	undefined
IGA-1-33	Igapo	2018	74	2018-10-21	2019-01-03	2018-12-06	18:46:07	MAMMAL	Insectivore.Omnivore	Philander	opossum	Philander_opossum	1	undefined
IGA-1-33	Igapo	2018	74	2018-10-21	2019-01-03	2018-12-10	17:10:12	MAMMAL	Frugivore.Granivore	Dasyprocta	leporina	Dasyprocta_leporina	1	undefined
IGA-1-33	Igapo	2018	74	2018-10-21	2019-01-03	2018-12-10	05:26:44	MAMMAL	Frugivore.Granivore	Myoprocta	acouchy	Myoprocta_acouchy	1	undefined
IGA-1-33	Igapo	2018	74	2018-10-21	2019-01-03	2018-12-10	18:20:14	MAMMAL	Frugivore.Granivore	Myoprocta	acouchy	Myoprocta_acouchy	1	undefined
IGA-1-33	Igapo	2018	74	2018-10-21	2019-01-03	2019-01-03	11:07:58	INSTALL	Retrieval	Retrieval	Retrieval	Pickup	1	undefined
IGA-1-33	Igapo	2018	74	2018-10-21	2019-01-03	2018-12-04	10:12:03	MAMMAL	Frugivore.Granivore	Myoprocta	acouchy	Myoprocta_acouchy	1	undefined
IGA-1-33	Igapo	2018	74	2018-10-21	2019-01-03	2018-12-11	12:14:24	MAMMAL	Frugivore.Granivore	Dasyprocta	leporina	Dasyprocta_leporina	1	undefined
IGA-1-33	Igapo	2018	74	2018-10-21	2019-01-03	2018-11-04	10:11:21	MAMMAL	Frugivore.Granivore	Dasyprocta	leporina	Dasyprocta_leporina	1	undefined
IGA-1-33	Igapo	2018	74	2018-10-21	2019-01-03	2019-01-01	21:19:48	MAMMAL	Insectivore.Omnivore	Philander	opossum	Philander_opossum	1	undefined
IGA-1-33	Igapo	2018	74	2018-10-21	2019-01-03	2018-11-13	18:07:50	MAMMAL	Frugivore.Granivore	Myoprocta	acouchy	Myoprocta_acouchy	1	undefined
IGA-1-33	Igapo	2018	74	2018-10-21	2019-01-03	2018-12-31	06:07:43	MAMMAL	Frugivore.Granivore	Myoprocta	acouchy	Myoprocta_acouchy	1	undefined
IGA-1-33	Igapo	2018	74	2018-10-21	2019-01-03	2018-11-15	12:43:54	MAMMAL	Frugivore.Granivore	Dasyprocta	leporina	Dasyprocta_leporina	1	undefined
IGA-1-33	Igapo	2018	74	2018-10-21	2019-01-03	2018-11-30	00:30:50	MAMMAL	Insectivore.Omnivore	Philander	opossum	Philander_opossum	1	undefined
IGA-1-33	Igapo	2018	74	2018-10-21	2019-01-03	2018-10-31	21:28:03	MAMMAL	Frugivore.Herbivore	Cuniculus	paca	Cuniculus_paca	1	undefined
IGA-1-33	Igapo	2018	74	2018-10-21	2019-01-03	2018-10-31	22:37:55	MAMMAL	Frugivore.Herbivore	Cuniculus	paca	Cuniculus_paca	1	undefined
IGA-1-33	Igapo	2018	74	2018-10-21	2019-01-03	2018-12-28	06:26:32	MAMMAL	Frugivore.Granivore	Dasyprocta	leporina	Dasyprocta_leporina	1	undefined
IGA-1-33	Igapo	2018	74	2018-10-21	2019-01-03	2018-11-28	08:01:04	MAMMAL	Frugivore.Granivore	Myoprocta	acouchy	Myoprocta_acouchy	1	undefined
IGA-1-33	Igapo	2018	74	2018-10-21	2019-01-03	2018-11-18	07:49:14	MAMMAL	Frugivore.Granivore	Dasyprocta	leporina	Dasyprocta_leporina	1	undefined
IGA-1-33	Igapo	2018	74	2018-10-21	2019-01-03	2018-11-27	07:42:08	MAMMAL	Frugivore.Granivore	Dasyprocta	leporina	Dasyprocta_leporina	1	undefined
IGA-1-33	Igapo	2018	74	2018-10-21	2019-01-03	2018-12-19	04:29:24	MAMMAL	Insectivore.Omnivore	Dasypus	spp.	Dasypus_spp.	1	undefined
IGA-1-33	Igapo	2018	74	2018-10-21	2019-01-03	2018-12-19	18:15:06	MAMMAL	Frugivore.Granivore	Myoprocta	acouchy	Myoprocta_acouchy	1	undefined
IGA-1-33	Igapo	2018	74	2018-10-21	2019-01-03	2018-10-21	09:57:26	INSTALL	Setup	Setup	Setup	Setup	1	undefined
IGA-1-33	Igapo	2018	74	2018-10-21	2019-01-03	2018-10-21	17:53:25	MAMMAL	Frugivore.Granivore	Myoprocta	acouchy	Myoprocta_acouchy	1	undefined
IGA-1-33	Igapo	2018	74	2018-10-21	2019-01-03	2018-12-24	06:17:17	MAMMAL	Frugivore.Granivore	Myoprocta	acouchy	Myoprocta_acouchy	1	undefined
IGA-1-33	Igapo	2018	74	2018-10-21	2019-01-03	2018-11-21	21:58:24	MAMMAL	Frugivore.Omnivore	Didelphis	marsupialis	Didelphis_marsupialis	1	undefined
IGA-1-33	Igapo	2018	74	2018-10-21	2019-01-03	2018-11-21	05:25:41	MAMMAL	Frugivore.Granivore	Myoprocta	acouchy	Myoprocta_acouchy	1	undefined
IGA-1-33	Igapo	2018	74	2018-10-21	2019-01-03	2018-11-24	18:20:17	MAMMAL	Frugivore.Granivore	Myoprocta	acouchy	Myoprocta_acouchy	1	undefined
IGA-1-33	Igapo	2018	74	2018-10-21	2019-01-03	2018-10-23	17:54:29	MAMMAL	Frugivore.Granivore	Myoprocta	acouchy	Myoprocta_acouchy	1	undefined
IGA-1-33	Igapo	2018	74	2018-10-21	2019-01-03	2018-10-25	18:05:13	MAMMAL	Frugivore.Granivore	Myoprocta	acouchy	Myoprocta_acouchy	1	undefined
IGA-1-33	Igapo	2018	74	2018-10-21	2019-01-03	2018-12-22	20:45:48	MAMMAL	Frugivore.Omnivore	Didelphis	marsupialis	Didelphis_marsupialis	1	undefined
IGA-1-33	Igapo	2018	74	2018-10-21	2019-01-03	2018-10-24	17:48:27	MAMMAL	Frugivore.Granivore	Dasyprocta	leporina	Dasyprocta_leporina	2	undefined
IGA-1-33	Igapo	2018	74	2018-10-21	2019-01-03	2018-10-24	05:30:23	MAMMAL	Frugivore.Granivore	Myoprocta	acouchy	Myoprocta_acouchy	1	undefined
IGA-1-33	Igapo	2018	74	2018-10-21	2019-01-03	2018-10-24	18:06:44	MAMMAL	Frugivore.Granivore	Myoprocta	acouchy	Myoprocta_acouchy	1	undefined
IGA-2-33	Igapo	2019	59	2019-10-18	2019-12-16	2019-10-31	05:38:06	MAMMAL	Frugivore.Granivore	Dasyprocta	leporina	Dasyprocta_leporina	1	undefined
IGA-2-33	Igapo	2019	59	2019-10-18	2019-12-16	2019-10-31	02:06:13	MAMMAL	Frugivore.Granivore	Proechimys	spp.	Proechimys_spp.	1	undefined
IGA-2-33	Igapo	2019	59	2019-10-18	2019-12-16	2019-11-23	03:26:14	MAMMAL	Frugivore.Granivore	Proechimys	spp.	Proechimys_spp.	1	undefined
IGA-2-33	Igapo	2019	59	2019-10-18	2019-12-16	2019-11-04	10:01:44	MAMMAL	Frugivore.Granivore	Dasyprocta	leporina	Dasyprocta_leporina	1	undefined
IGA-2-33	Igapo	2019	59	2019-10-18	2019-12-16	2019-11-19	05:58:26	MAMMAL	Frugivore.Granivore	Myoprocta	acouchy	Myoprocta_acouchy	1	undefined
IGA-2-33	Igapo	2019	59	2019-10-18	2019-12-16	2019-11-18	08:30:29	MAMMAL	Frugivore.Granivore	Dasyprocta	leporina	Dasyprocta_leporina	1	undefined
IGA-2-33	Igapo	2019	59	2019-10-18	2019-12-16	2019-11-17	05:30:23	MAMMAL	Carnivore	Puma	yagouaroundi	Puma_yagouaroundi	1	undefined
IGA-2-33	Igapo	2019	59	2019-10-18	2019-12-16	2019-12-07	12:46:23	MAMMAL	nodata	Sapajus	apella	Sapajus_apella	2	undefined
IGA-2-33	Igapo	2019	59	2019-10-18	2019-12-16	2019-10-18	14:19:55	INSTALL	Setup	Setup	Setup	Setup	1	undefined
IGA-2-33	Igapo	2019	59	2019-10-18	2019-12-16	2019-12-16	06:34:37	MAMMAL	Frugivore.Granivore	Dasyprocta	leporina	Dasyprocta_leporina	1	undefined
IGA-2-33	Igapo	2019	59	2019-10-18	2019-12-16	2019-12-16	10:07:28	INSTALL	Retrieval	Retrieval	Retrieval	Pickup	1	undefined
IGA-2-33	Igapo	2019	59	2019-10-18	2019-12-16	2019-12-08	07:04:12	MAMMAL	Frugivore.Granivore	Dasyprocta	leporina	Dasyprocta_leporina	1	undefined
IGA-2-33	Igapo	2019	59	2019-10-18	2019-12-16	2019-12-08	12:10:22	MAMMAL	Frugivore.Granivore	Dasyprocta	leporina	Dasyprocta_leporina	1	undefined
IGA-2-33	Igapo	2019	59	2019-10-18	2019-12-16	2019-12-08	16:28:12	MAMMAL	Frugivore.Granivore	Dasyprocta	leporina	Dasyprocta_leporina	1	undefined
IGA-2-33	Igapo	2019	59	2019-10-18	2019-12-16	2019-12-08	03:38:51	MAMMAL	Frugivore.Granivore	Proechimys	spp.	Proechimys_spp.	1	undefined
IGA-2-33	Igapo	2019	59	2019-10-18	2019-12-16	2019-11-09	08:16:26	MAMMAL	Frugivore.Granivore	Dasyprocta	leporina	Dasyprocta_leporina	1	undefined
IGA-2-33	Igapo	2019	59	2019-10-18	2019-12-16	2019-12-13	17:28:25	MAMMAL	Frugivore.Granivore	Dasyprocta	leporina	Dasyprocta_leporina	1	undefined
IGA-2-33	Igapo	2019	59	2019-10-18	2019-12-16	2019-12-11	17:03:35	MAMMAL	Frugivore.Granivore	Dasyprocta	leporina	Dasyprocta_leporina	1	undefined
IGA-1-34	Igapo	2018	74	2018-10-21	2019-01-03	2018-12-06	06:05:47	MAMMAL	Frugivore.Granivore	Dasyprocta	leporina	Dasyprocta_leporina	1	undefined
IGA-1-34	Igapo	2018	74	2018-10-21	2019-01-03	2018-12-06	12:33:49	MAMMAL	Frugivore.Granivore	Dasyprocta	leporina	Dasyprocta_leporina	1	undefined
IGA-1-34	Igapo	2018	74	2018-10-21	2019-01-03	2018-12-06	19:43:34	MAMMAL	Frugivore.Herbivore	Mazama	americana	Mazama_americana	1	undefined
IGA-1-34	Igapo	2018	74	2018-10-21	2019-01-03	2018-12-09	07:28:44	MAMMAL	Frugivore.Granivore	Dasyprocta	leporina	Dasyprocta_leporina	1	undefined
IGA-1-34	Igapo	2018	74	2018-10-21	2019-01-03	2019-01-03	10:52:28	INSTALL	Retrieval	Retrieval	Retrieval	Pickup	1	undefined
IGA-1-34	Igapo	2018	74	2018-10-21	2019-01-03	2018-11-04	08:36:25	MAMMAL	Frugivore.Granivore	Dasyprocta	leporina	Dasyprocta_leporina	1	undefined
IGA-1-34	Igapo	2018	74	2018-10-21	2019-01-03	2018-12-31	03:34:49	MAMMAL	Insectivore.Omnivore	Metachirus	nudicaudatus	Metachirus_nudicaudatus	1	undefined
IGA-1-34	Igapo	2018	74	2018-10-21	2019-01-03	2018-12-28	20:28:01	MAMMAL	Insectivore.Omnivore	Metachirus	nudicaudatus	Metachirus_nudicaudatus	1	undefined
IGA-1-34	Igapo	2018	74	2018-10-21	2019-01-03	2018-10-29	17:29:28	MAMMAL	Frugivore.Granivore	Myoprocta	acouchy	Myoprocta_acouchy	1	undefined
IGA-1-34	Igapo	2018	74	2018-10-21	2019-01-03	2018-11-27	06:26:30	MAMMAL	Frugivore.Granivore	Dasyprocta	leporina	Dasyprocta_leporina	1	undefined
IGA-1-34	Igapo	2018	74	2018-10-21	2019-01-03	2018-11-26	06:06:40	MAMMAL	Frugivore.Granivore	Myoprocta	acouchy	Myoprocta_acouchy	1	undefined
IGA-1-34	Igapo	2018	74	2018-10-21	2019-01-03	2018-10-21	09:16:07	INSTALL	Setup	Setup	Setup	Setup	1	undefined
IGA-1-34	Igapo	2018	74	2018-10-21	2019-01-03	2018-11-24	17:30:29	MAMMAL	Frugivore.Granivore	Dasyprocta	leporina	Dasyprocta_leporina	1	undefined
IGA-1-34	Igapo	2018	74	2018-10-21	2019-01-03	2018-12-21	16:10:21	MAMMAL	Frugivore.Granivore	Dasyprocta	leporina	Dasyprocta_leporina	1	undefined
IGA-1-34	Igapo	2018	74	2018-10-21	2019-01-03	2018-12-23	21:10:13	MAMMAL	Frugivore.Herbivore	Mazama	americana	Mazama_americana	1	undefined
IGA-2-34	Igapo	2019	59	2019-10-18	2019-12-16	2019-10-29	17:56:51	MAMMAL	Frugivore.Granivore	Myoprocta	acouchy	Myoprocta_acouchy	1	undefined
IGA-2-34	Igapo	2019	59	2019-10-18	2019-12-16	2019-10-31	18:05:46	MAMMAL	Frugivore.Granivore	Myoprocta	acouchy	Myoprocta_acouchy	1	undefined
IGA-2-34	Igapo	2019	59	2019-10-18	2019-12-16	2019-11-01	05:19:06	MAMMAL	Frugivore.Granivore	Myoprocta	acouchy	Myoprocta_acouchy	1	undefined
IGA-2-34	Igapo	2019	59	2019-10-18	2019-12-16	2019-12-01	18:06:41	MAMMAL	Frugivore.Granivore	Myoprocta	acouchy	Myoprocta_acouchy	1	undefined
IGA-2-34	Igapo	2019	59	2019-10-18	2019-12-16	2019-10-22	21:03:55	MAMMAL	Frugivore.Herbivore	Cuniculus	paca	Cuniculus_paca	1	undefined
IGA-2-34	Igapo	2019	59	2019-10-18	2019-12-16	2019-11-05	05:38:35	MAMMAL	Frugivore.Granivore	Myoprocta	acouchy	Myoprocta_acouchy	1	undefined
IGA-2-34	Igapo	2019	59	2019-10-18	2019-12-16	2019-11-19	08:36:13	MAMMAL	Frugivore.Granivore	Dasyprocta	leporina	Dasyprocta_leporina	1	undefined
IGA-2-34	Igapo	2019	59	2019-10-18	2019-12-16	2019-12-05	17:13:31	MAMMAL	Frugivore.Granivore	Dasyprocta	leporina	Dasyprocta_leporina	1	undefined
IGA-2-34	Igapo	2019	59	2019-10-18	2019-12-16	2019-10-19	20:53:08	MAMMAL	Frugivore.Omnivore	Didelphis	marsupialis	Didelphis_marsupialis	1	undefined
IGA-2-34	Igapo	2019	59	2019-10-18	2019-12-16	2019-10-19	22:00:16	MAMMAL	Frugivore.Omnivore	Didelphis	marsupialis	Didelphis_marsupialis	1	undefined
IGA-2-34	Igapo	2019	59	2019-10-18	2019-12-16	2019-11-07	07:14:57	MAMMAL	Frugivore.Granivore	Dasyprocta	leporina	Dasyprocta_leporina	1	undefined
IGA-2-34	Igapo	2019	59	2019-10-18	2019-12-16	2019-10-18	13:51:30	INSTALL	Setup	Setup	Setup	Setup	1	undefined
IGA-2-34	Igapo	2019	59	2019-10-18	2019-12-16	2019-12-16	09:57:03	INSTALL	Retrieval	Retrieval	Retrieval	Pickup	1	undefined
IGA-2-34	Igapo	2019	59	2019-10-18	2019-12-16	2019-11-15	15:46:44	MAMMAL	Frugivore.Granivore	Dasyprocta	leporina	Dasyprocta_leporina	1	undefined
IGA-2-34	Igapo	2019	59	2019-10-18	2019-12-16	2019-12-09	17:24:30	MAMMAL	Frugivore.Granivore	Dasyprocta	leporina	Dasyprocta_leporina	1	undefined
IGA-2-34	Igapo	2019	59	2019-10-18	2019-12-16	2019-12-14	19:00:26	MAMMAL	Carnivore	Leopardus	pardalis	Leopardus_pardalis	1	undefined
IGA-2-34	Igapo	2019	59	2019-10-18	2019-12-16	2019-11-14	03:52:07	MAMMAL	Frugivore.Omnivore	Didelphis	marsupialis	Didelphis_marsupialis	1	undefined
IGA-1-35	Igapo	2018	75	2018-10-20	2019-01-03	2018-11-08	06:51:00	MAMMAL	Frugivore.Granivore	Dasyprocta	leporina	Dasyprocta_leporina	1	undefined
IGA-1-35	Igapo	2018	75	2018-10-20	2019-01-03	2018-12-08	23:56:34	MAMMAL	Frugivore.Herbivore	Cuniculus	paca	Cuniculus_paca	1	undefined
IGA-1-35	Igapo	2018	75	2018-10-20	2019-01-03	2018-11-09	12:57:02	MAMMAL	Frugivore.Granivore	Dasyprocta	leporina	Dasyprocta_leporina	1	undefined
IGA-1-35	Igapo	2018	75	2018-10-20	2019-01-03	2018-12-06	04:43:38	MAMMAL	Insectivore.Omnivore	Philander	opossum	Philander_opossum	1	undefined
IGA-1-35	Igapo	2018	75	2018-10-20	2019-01-03	2018-12-05	19:42:08	MAMMAL	Frugivore.Granivore	Dasyprocta	leporina	Dasyprocta_leporina	1	undefined
IGA-1-35	Igapo	2018	75	2018-10-20	2019-01-03	2018-12-05	23:57:56	MAMMAL	Insectivore.Omnivore	Philander	opossum	Philander_opossum	1	undefined
IGA-1-35	Igapo	2018	75	2018-10-20	2019-01-03	2018-12-10	16:58:57	MAMMAL	Frugivore.Granivore	Dasyprocta	leporina	Dasyprocta_leporina	1	undefined
IGA-1-35	Igapo	2018	75	2018-10-20	2019-01-03	2018-12-10	01:16:53	MAMMAL	Insectivore.Omnivore	Philander	opossum	Philander_opossum	1	undefined
IGA-1-35	Igapo	2018	75	2018-10-20	2019-01-03	2018-12-10	21:31:09	MAMMAL	Insectivore.Omnivore	Philander	opossum	Philander_opossum	1	undefined
IGA-1-35	Igapo	2018	75	2018-10-20	2019-01-03	2018-11-05	11:32:02	MAMMAL	Frugivore.Granivore	Dasyprocta	leporina	Dasyprocta_leporina	1	undefined
IGA-1-35	Igapo	2018	75	2018-10-20	2019-01-03	2019-01-03	10:24:22	INSTALL	Retrieval	Retrieval	Retrieval	Pickup	1	undefined
IGA-1-35	Igapo	2018	75	2018-10-20	2019-01-03	2018-12-04	04:35:43	MAMMAL	Insectivore.Omnivore	Philander	opossum	Philander_opossum	1	undefined
IGA-1-35	Igapo	2018	75	2018-10-20	2019-01-03	2018-12-11	23:53:01	MAMMAL	Insectivore.Omnivore	Philander	opossum	Philander_opossum	1	undefined
IGA-1-35	Igapo	2018	75	2018-10-20	2019-01-03	2018-11-04	07:59:59	MAMMAL	Frugivore.Granivore	Dasyprocta	leporina	Dasyprocta_leporina	1	undefined
IGA-1-35	Igapo	2018	75	2018-10-20	2019-01-03	2018-11-04	21:35:42	MAMMAL	Insectivore.Omnivore	Philander	opossum	Philander_opossum	1	undefined
IGA-1-35	Igapo	2018	75	2018-10-20	2019-01-03	2019-01-02	18:34:06	MAMMAL	Frugivore.Granivore	Dasyprocta	leporina	Dasyprocta_leporina	1	undefined
IGA-1-35	Igapo	2018	75	2018-10-20	2019-01-03	2018-12-03	06:52:32	MAMMAL	Frugivore.Granivore	Dasyprocta	leporina	Dasyprocta_leporina	1	undefined
IGA-1-35	Igapo	2018	75	2018-10-20	2019-01-03	2018-12-12	04:38:12	MAMMAL	Insectivore.Omnivore	Philander	opossum	Philander_opossum	1	undefined
IGA-1-35	Igapo	2018	75	2018-10-20	2019-01-03	2018-12-02	15:45:40	MAMMAL	Frugivore.Herbivore	Mazama	nemorivaga	Mazama_nemorivaga	1	undefined
IGA-1-35	Igapo	2018	75	2018-10-20	2019-01-03	2018-12-13	18:22:36	MAMMAL	Frugivore.Granivore	Dasyprocta	leporina	Dasyprocta_leporina	1	undefined
IGA-1-35	Igapo	2018	75	2018-10-20	2019-01-03	2018-12-01	08:12:29	MAMMAL	Frugivore.Granivore	Dasyprocta	leporina	Dasyprocta_leporina	1	undefined
IGA-1-35	Igapo	2018	75	2018-10-20	2019-01-03	2018-12-30	07:17:49	MAMMAL	Frugivore.Granivore	Dasyprocta	leporina	Dasyprocta_leporina	1	undefined
IGA-1-35	Igapo	2018	75	2018-10-20	2019-01-03	2018-11-16	19:15:07	MAMMAL	Frugivore.Granivore	Dasyprocta	leporina	Dasyprocta_leporina	1	undefined
IGA-1-35	Igapo	2018	75	2018-10-20	2019-01-03	2018-11-29	21:16:59	MAMMAL	Insectivore.Omnivore	Philander	opossum	Philander_opossum	1	undefined
IGA-1-35	Igapo	2018	75	2018-10-20	2019-01-03	2018-12-16	11:05:55	MAMMAL	Frugivore.Granivore	Dasyprocta	leporina	Dasyprocta_leporina	1	undefined
IGA-1-35	Igapo	2018	75	2018-10-20	2019-01-03	2018-12-16	01:02:25	MAMMAL	Insectivore.Omnivore	Philander	opossum	Philander_opossum	1	undefined
IGA-1-35	Igapo	2018	75	2018-10-20	2019-01-03	2018-12-16	02:19:00	MAMMAL	Insectivore.Omnivore	Philander	opossum	Philander_opossum	1	undefined
IGA-1-35	Igapo	2018	75	2018-10-20	2019-01-03	2018-12-28	19:24:43	MAMMAL	Insectivore.Omnivore	Dasypus	spp.	Dasypus_spp.	1	undefined
IGA-1-35	Igapo	2018	75	2018-10-20	2019-01-03	2018-12-28	22:50:22	MAMMAL	Insectivore.Omnivore	Philander	opossum	Philander_opossum	1	undefined
IGA-1-35	Igapo	2018	75	2018-10-20	2019-01-03	2018-11-28	09:16:02	MAMMAL	Frugivore.Granivore	Dasyprocta	leporina	Dasyprocta_leporina	1	undefined
IGA-1-35	Igapo	2018	75	2018-10-20	2019-01-03	2018-10-20	14:32:52	INSTALL	Setup	Setup	Setup	Setup	1	undefined
IGA-1-35	Igapo	2018	75	2018-10-20	2019-01-03	2018-10-28	03:44:19	MAMMAL	Insectivore.Omnivore	Philander	opossum	Philander_opossum	1	undefined
IGA-1-35	Igapo	2018	75	2018-10-20	2019-01-03	2018-11-19	00:20:35	MAMMAL	Frugivore.Granivore	Proechimys	spp.	Proechimys_spp.	1	undefined
IGA-1-35	Igapo	2018	75	2018-10-20	2019-01-03	2018-11-26	21:07:54	MAMMAL	Insectivore.Omnivore	Philander	opossum	Philander_opossum	1	undefined
IGA-1-35	Igapo	2018	75	2018-10-20	2019-01-03	2018-10-21	04:13:09	MAMMAL	Insectivore.Omnivore	Philander	opossum	Philander_opossum	1	undefined
IGA-1-35	Igapo	2018	75	2018-10-20	2019-01-03	2018-12-25	19:21:00	MAMMAL	Insectivore.Omnivore	Dasypus	spp.	Dasypus_spp.	1	undefined
IGA-1-35	Igapo	2018	75	2018-10-20	2019-01-03	2018-11-20	09:09:24	MAMMAL	Frugivore.Granivore	Dasyprocta	leporina	Dasyprocta_leporina	1	undefined
IGA-1-35	Igapo	2018	75	2018-10-20	2019-01-03	2018-11-25	07:07:54	MAMMAL	Frugivore.Granivore	Dasyprocta	leporina	Dasyprocta_leporina	1	undefined
IGA-1-35	Igapo	2018	75	2018-10-20	2019-01-03	2018-12-20	18:22:43	MAMMAL	Frugivore.Granivore	Dasyprocta	leporina	Dasyprocta_leporina	1	undefined
IGA-1-35	Igapo	2018	75	2018-10-20	2019-01-03	2018-11-23	15:51:37	MAMMAL	Frugivore.Granivore	Dasyprocta	leporina	Dasyprocta_leporina	1	undefined
IGA-2-35	Igapo	2019	59	2019-10-18	2019-12-16	2019-11-28	15:56:44	MAMMAL	Frugivore.Granivore	Dasyprocta	leporina	Dasyprocta_leporina	1	undefined
IGA-2-35	Igapo	2019	59	2019-10-18	2019-12-16	2019-11-28	17:44:06	MAMMAL	Frugivore.Granivore	Dasyprocta	leporina	Dasyprocta_leporina	1	undefined
IGA-2-35	Igapo	2019	59	2019-10-18	2019-12-16	2019-10-30	06:03:07	MAMMAL	Frugivore.Granivore	Dasyprocta	leporina	Dasyprocta_leporina	1	undefined
IGA-2-35	Igapo	2019	59	2019-10-18	2019-12-16	2019-11-25	17:57:11	MAMMAL	Frugivore.Granivore	Dasyprocta	leporina	Dasyprocta_leporina	1	undefined
IGA-2-35	Igapo	2019	59	2019-10-18	2019-12-16	2019-11-01	15:09:55	MAMMAL	Frugivore.Granivore	Dasyprocta	leporina	Dasyprocta_leporina	1	undefined
IGA-2-35	Igapo	2019	59	2019-10-18	2019-12-16	2019-10-22	04:33:41	MAMMAL	Carnivore	Leopardus	wiedii	Leopardus_wiedii	1	Male
IGA-2-35	Igapo	2019	59	2019-10-18	2019-12-16	2019-10-21	06:34:52	MAMMAL	Frugivore.Granivore	Dasyprocta	leporina	Dasyprocta_leporina	1	undefined
IGA-2-35	Igapo	2019	59	2019-10-18	2019-12-16	2019-10-21	05:15:27	MAMMAL	Carnivore	Leopardus	wiedii	Leopardus_wiedii	1	undefined
IGA-2-35	Igapo	2019	59	2019-10-18	2019-12-16	2019-11-19	06:08:39	MAMMAL	Frugivore.Granivore	Dasyprocta	leporina	Dasyprocta_leporina	1	undefined
IGA-2-35	Igapo	2019	59	2019-10-18	2019-12-16	2019-12-06	17:33:48	MAMMAL	Frugivore.Granivore	Dasyprocta	leporina	Dasyprocta_leporina	1	undefined
IGA-2-35	Igapo	2019	59	2019-10-18	2019-12-16	2019-10-18	12:51:32	INSTALL	Setup	Setup	Setup	Setup	1	undefined
IGA-2-35	Igapo	2019	59	2019-10-18	2019-12-16	2019-12-16	09:49:24	INSTALL	Retrieval	Retrieval	Retrieval	Pickup	1	undefined
IGA-2-35	Igapo	2019	59	2019-10-18	2019-12-16	2019-11-16	16:48:57	MAMMAL	Frugivore.Granivore	Dasyprocta	leporina	Dasyprocta_leporina	1	undefined
IGA-2-35	Igapo	2019	59	2019-10-18	2019-12-16	2019-12-14	18:02:46	MAMMAL	Frugivore.Granivore	Dasyprocta	leporina	Dasyprocta_leporina	1	undefined
IGA-2-35	Igapo	2019	59	2019-10-18	2019-12-16	2019-11-10	17:02:22	MAMMAL	Frugivore.Granivore	Dasyprocta	leporina	Dasyprocta_leporina	1	undefined
IGA-2-35	Igapo	2019	59	2019-10-18	2019-12-16	2019-11-14	05:53:44	MAMMAL	Frugivore.Granivore	Dasyprocta	leporina	Dasyprocta_leporina	1	undefined
IGA-2-35	Igapo	2019	59	2019-10-18	2019-12-16	2019-11-14	07:06:05	MAMMAL	Frugivore.Granivore	Dasyprocta	leporina	Dasyprocta_leporina	1	undefined
IGA-2-35	Igapo	2019	59	2019-10-18	2019-12-16	2019-12-13	09:25:26	MAMMAL	Frugivore.Granivore	Dasyprocta	leporina	Dasyprocta_leporina	1	undefined
IGA-2-35	Igapo	2019	59	2019-10-18	2019-12-16	2019-11-11	10:35:59	MAMMAL	Frugivore.Granivore	Dasyprocta	leporina	Dasyprocta_leporina	1	undefined
IGA-2-35	Igapo	2019	59	2019-10-18	2019-12-16	2019-12-11	05:35:26	MAMMAL	Frugivore.Granivore	Dasyprocta	leporina	Dasyprocta_leporina	1	undefined
IGA-1-36	Igapo	2018	75	2018-10-20	2019-01-03	2018-11-08	19:56:35	MAMMAL	Insectivore.Omnivore	Dasypus	spp.	Dasypus_spp.	1	undefined
IGA-1-36	Igapo	2018	75	2018-10-20	2019-01-03	2018-11-07	19:48:54	MAMMAL	Frugivore.Omnivore	Didelphis	marsupialis	Didelphis_marsupialis	1	undefined
IGA-1-36	Igapo	2018	75	2018-10-20	2019-01-03	2018-11-09	06:12:21	MAMMAL	Frugivore.Granivore	Dasyprocta	leporina	Dasyprocta_leporina	1	undefined
IGA-1-36	Igapo	2018	75	2018-10-20	2019-01-03	2018-12-09	07:38:28	MAMMAL	Frugivore.Granivore	Dasyprocta	leporina	Dasyprocta_leporina	1	undefined
IGA-1-36	Igapo	2018	75	2018-10-20	2019-01-03	2018-12-10	05:44:18	MAMMAL	Frugivore.Granivore	Dasyprocta	leporina	Dasyprocta_leporina	1	undefined
IGA-1-36	Igapo	2018	75	2018-10-20	2019-01-03	2018-11-05	00:52:56	MAMMAL	Frugivore.Granivore	Proechimys	spp.	Proechimys_spp.	1	undefined
IGA-1-36	Igapo	2018	75	2018-10-20	2019-01-03	2019-01-03	01:37:46	MAMMAL	Insectivore.Omnivore	Metachirus	nudicaudatus	Metachirus_nudicaudatus	1	undefined
IGA-1-36	Igapo	2018	75	2018-10-20	2019-01-03	2019-01-03	10:00:32	INSTALL	Retrieval	Retrieval	Retrieval	Pickup	1	undefined
IGA-1-36	Igapo	2018	75	2018-10-20	2019-01-03	2018-11-04	13:56:17	MAMMAL	Frugivore.Granivore	Dasyprocta	leporina	Dasyprocta_leporina	1	undefined
IGA-1-36	Igapo	2018	75	2018-10-20	2019-01-03	2019-01-02	05:14:55	MAMMAL	Insectivore.Omnivore	Metachirus	nudicaudatus	Metachirus_nudicaudatus	1	undefined
IGA-1-36	Igapo	2018	75	2018-10-20	2019-01-03	2018-11-12	09:51:52	MAMMAL	Frugivore.Granivore	Dasyprocta	leporina	Dasyprocta_leporina	1	undefined
IGA-1-36	Igapo	2018	75	2018-10-20	2019-01-03	2018-11-02	14:35:38	MAMMAL	Frugivore.Granivore	Dasyprocta	leporina	Dasyprocta_leporina	1	undefined
IGA-1-36	Igapo	2018	75	2018-10-20	2019-01-03	2018-12-01	17:07:44	MAMMAL	Frugivore.Granivore	Dasyprocta	leporina	Dasyprocta_leporina	1	undefined
IGA-1-36	Igapo	2018	75	2018-10-20	2019-01-03	2018-12-14	07:58:23	MAMMAL	Frugivore.Granivore	Dasyprocta	leporina	Dasyprocta_leporina	1	undefined
IGA-1-36	Igapo	2018	75	2018-10-20	2019-01-03	2018-12-30	22:54:02	MAMMAL	Insectivore.Omnivore	Metachirus	nudicaudatus	Metachirus_nudicaudatus	1	undefined
IGA-1-36	Igapo	2018	75	2018-10-20	2019-01-03	2018-12-16	02:26:33	MAMMAL	Frugivore.Granivore	Proechimys	spp.	Proechimys_spp.	1	undefined
IGA-1-36	Igapo	2018	75	2018-10-20	2019-01-03	2018-12-28	19:37:03	MAMMAL	Insectivore.Omnivore	Metachirus	nudicaudatus	Metachirus_nudicaudatus	1	undefined
IGA-1-36	Igapo	2018	75	2018-10-20	2019-01-03	2018-12-28	20:41:21	MAMMAL	Insectivore.Omnivore	Metachirus	nudicaudatus	Metachirus_nudicaudatus	1	undefined
IGA-1-36	Igapo	2018	75	2018-10-20	2019-01-03	2018-11-17	14:56:14	MAMMAL	Frugivore.Granivore	Dasyprocta	leporina	Dasyprocta_leporina	1	undefined
IGA-1-36	Igapo	2018	75	2018-10-20	2019-01-03	2018-12-17	04:34:51	MAMMAL	Frugivore.Granivore	Proechimys	spp.	Proechimys_spp.	1	undefined
IGA-1-36	Igapo	2018	75	2018-10-20	2019-01-03	2018-11-18	14:45:29	MAMMAL	Frugivore.Granivore	Dasyprocta	leporina	Dasyprocta_leporina	1	undefined
IGA-1-36	Igapo	2018	75	2018-10-20	2019-01-03	2018-10-20	12:32:56	INSTALL	Setup	Setup	Setup	Setup	1	undefined
IGA-1-36	Igapo	2018	75	2018-10-20	2019-01-03	2018-12-26	22:04:39	MAMMAL	Insectivore.Omnivore	Metachirus	nudicaudatus	Metachirus_nudicaudatus	1	undefined
IGA-1-36	Igapo	2018	75	2018-10-20	2019-01-03	2018-10-27	09:41:10	MAMMAL	Frugivore.Herbivore	Dicotyles	tajacu	Dicotyles_tajacu	1	undefined
IGA-1-36	Igapo	2018	75	2018-10-20	2019-01-03	2018-12-25	15:27:11	MAMMAL	Frugivore.Granivore	Dasyprocta	leporina	Dasyprocta_leporina	1	undefined
IGA-1-36	Igapo	2018	75	2018-10-20	2019-01-03	2018-12-25	21:01:08	MAMMAL	Insectivore.Omnivore	Metachirus	nudicaudatus	Metachirus_nudicaudatus	1	undefined
IGA-1-36	Igapo	2018	75	2018-10-20	2019-01-03	2018-11-23	16:19:04	MAMMAL	Frugivore.Granivore	Dasyprocta	leporina	Dasyprocta_leporina	1	undefined
IGA-2-36	Igapo	2019	59	2019-10-18	2019-12-16	2019-11-26	03:36:10	MAMMAL	Frugivore.Herbivore	Mazama	americana	Mazama_americana	1	Female
IGA-2-36	Igapo	2019	59	2019-10-18	2019-12-16	2019-11-28	03:11:14	MAMMAL	Frugivore.Omnivore	Didelphis	marsupialis	Didelphis_marsupialis	1	undefined
IGA-2-36	Igapo	2019	59	2019-10-18	2019-12-16	2019-11-24	23:37:54	MAMMAL	Frugivore.Omnivore	Didelphis	marsupialis	Didelphis_marsupialis	1	undefined
IGA-2-36	Igapo	2019	59	2019-10-18	2019-12-16	2019-11-30	19:59:34	MAMMAL	Frugivore.Omnivore	Didelphis	marsupialis	Didelphis_marsupialis	1	undefined
IGA-2-36	Igapo	2019	59	2019-10-18	2019-12-16	2019-11-22	01:27:35	MAMMAL	Frugivore.Omnivore	Didelphis	marsupialis	Didelphis_marsupialis	1	undefined
IGA-2-36	Igapo	2019	59	2019-10-18	2019-12-16	2019-10-23	03:34:09	MAMMAL	Frugivore.Herbivore	Mazama	americana	Mazama_americana	1	Female
IGA-2-36	Igapo	2019	59	2019-10-18	2019-12-16	2019-11-03	00:02:26	MAMMAL	Frugivore.Omnivore	Didelphis	marsupialis	Didelphis_marsupialis	1	undefined
IGA-2-36	Igapo	2019	59	2019-10-18	2019-12-16	2019-11-03	22:12:07	MAMMAL	Frugivore.Herbivore	Mazama	americana	Mazama_americana	1	Female
IGA-2-36	Igapo	2019	59	2019-10-18	2019-12-16	2019-11-06	04:12:49	MAMMAL	Frugivore.Omnivore	Didelphis	marsupialis	Didelphis_marsupialis	1	undefined
IGA-2-36	Igapo	2019	59	2019-10-18	2019-12-16	2019-11-06	22:18:56	MAMMAL	Frugivore.Omnivore	Didelphis	marsupialis	Didelphis_marsupialis	1	undefined
IGA-2-36	Igapo	2019	59	2019-10-18	2019-12-16	2019-11-18	12:52:56	MAMMAL	Frugivore.Granivore	Dasyprocta	leporina	Dasyprocta_leporina	1	undefined
IGA-2-36	Igapo	2019	59	2019-10-18	2019-12-16	2019-10-18	12:22:37	INSTALL	Setup	Setup	Setup	Setup	1	undefined
IGA-2-36	Igapo	2019	59	2019-10-18	2019-12-16	2019-12-16	09:37:37	INSTALL	Retrieval	Retrieval	Retrieval	Pickup	1	undefined
IGA-2-36	Igapo	2019	59	2019-10-18	2019-12-16	2019-11-16	07:45:41	MAMMAL	Frugivore.Granivore	Dasyprocta	leporina	Dasyprocta_leporina	1	undefined
IGA-2-36	Igapo	2019	59	2019-10-18	2019-12-16	2019-12-09	08:25:32	MAMMAL	Frugivore.Granivore	Dasyprocta	leporina	Dasyprocta_leporina	1	undefined
IGA-2-36	Igapo	2019	59	2019-10-18	2019-12-16	2019-12-14	05:49:54	MAMMAL	Frugivore.Granivore	Dasyprocta	leporina	Dasyprocta_leporina	1	undefined
IGA-2-36	Igapo	2019	59	2019-10-18	2019-12-16	2019-12-13	03:00:31	MAMMAL	Frugivore.Omnivore	Didelphis	marsupialis	Didelphis_marsupialis	1	undefined
IGA-2-36	Igapo	2019	59	2019-10-18	2019-12-16	2019-11-11	12:38:20	MAMMAL	Frugivore.Granivore	Dasyprocta	leporina	Dasyprocta_leporina	1	undefined
IGA-2-36	Igapo	2019	59	2019-10-18	2019-12-16	2019-12-11	01:21:21	MAMMAL	Frugivore.Omnivore	Didelphis	marsupialis	Didelphis_marsupialis	1	undefined
IGA-2-36	Igapo	2019	59	2019-10-18	2019-12-16	2019-12-12	20:28:39	MAMMAL	Frugivore.Herbivore	Mazama	americana	Mazama_americana	1	Male
IGA-1-37	Igapo	2018	75	2018-10-20	2019-01-03	2018-11-08	22:02:52	MAMMAL	Frugivore.Omnivore	Didelphis	marsupialis	Didelphis_marsupialis	1	undefined
IGA-1-37	Igapo	2018	75	2018-10-20	2019-01-03	2018-12-07	22:26:15	MAMMAL	Frugivore.Herbivore	Mazama	americana	Mazama_americana	1	undefined
IGA-1-37	Igapo	2018	75	2018-10-20	2019-01-03	2018-12-08	01:42:20	MAMMAL	Frugivore.Omnivore	Didelphis	marsupialis	Didelphis_marsupialis	1	undefined
IGA-1-37	Igapo	2018	75	2018-10-20	2019-01-03	2018-12-08	22:41:18	MAMMAL	Frugivore.Herbivore	Mazama	americana	Mazama_americana	1	undefined
IGA-1-37	Igapo	2018	75	2018-10-20	2019-01-03	2018-12-10	21:34:38	MAMMAL	Frugivore.Herbivore	Mazama	americana	Mazama_americana	1	undefined
IGA-1-37	Igapo	2018	75	2018-10-20	2019-01-03	2019-01-03	11:51:11	INSTALL	Retrieval	Retrieval	Retrieval	Pickup	1	undefined
IGA-1-37	Igapo	2018	75	2018-10-20	2019-01-03	2019-01-01	00:55:35	MAMMAL	Frugivore.Granivore	Proechimys	spp.	Proechimys_spp.	1	undefined
IGA-1-37	Igapo	2018	75	2018-10-20	2019-01-03	2018-11-02	19:32:26	MAMMAL	Frugivore.Omnivore	Didelphis	marsupialis	Didelphis_marsupialis	1	undefined
IGA-1-37	Igapo	2018	75	2018-10-20	2019-01-03	2018-12-31	01:25:13	MAMMAL	Frugivore.Omnivore	Didelphis	marsupialis	Didelphis_marsupialis	1	undefined
IGA-1-37	Igapo	2018	75	2018-10-20	2019-01-03	2018-11-15	18:22:33	MAMMAL	Frugivore.Granivore	Dasyprocta	leporina	Dasyprocta_leporina	1	undefined
IGA-1-37	Igapo	2018	75	2018-10-20	2019-01-03	2018-11-29	23:05:58	MAMMAL	Frugivore.Herbivore	Mazama	americana	Mazama_americana	1	undefined
IGA-1-37	Igapo	2018	75	2018-10-20	2019-01-03	2018-10-20	13:49:32	INSTALL	Setup	Setup	Setup	Setup	1	undefined
IGA-2-37	Igapo	2019	59	2019-10-18	2019-12-16	2019-11-28	05:53:46	MAMMAL	Frugivore.Granivore	Dasyprocta	leporina	Dasyprocta_leporina	1	undefined
IGA-2-37	Igapo	2019	59	2019-10-18	2019-12-16	2019-11-28	08:39:43	MAMMAL	Frugivore.Granivore	Dasyprocta	leporina	Dasyprocta_leporina	1	undefined
IGA-2-37	Igapo	2019	59	2019-10-18	2019-12-16	2019-10-30	02:14:40	MAMMAL	Frugivore.Herbivore	Cuniculus	paca	Cuniculus_paca	1	undefined
IGA-2-37	Igapo	2019	59	2019-10-18	2019-12-16	2019-10-30	06:04:26	MAMMAL	Frugivore.Granivore	Dasyprocta	leporina	Dasyprocta_leporina	1	undefined
IGA-2-37	Igapo	2019	59	2019-10-18	2019-12-16	2019-11-24	06:50:08	MAMMAL	Frugivore.Granivore	Dasyprocta	leporina	Dasyprocta_leporina	1	undefined
IGA-2-37	Igapo	2019	59	2019-10-18	2019-12-16	2019-12-01	09:05:50	MAMMAL	Frugivore.Granivore	Dasyprocta	leporina	Dasyprocta_leporina	1	undefined
IGA-2-37	Igapo	2019	59	2019-10-18	2019-12-16	2019-12-01	15:52:30	MAMMAL	Frugivore.Granivore	Dasyprocta	leporina	Dasyprocta_leporina	1	undefined
IGA-2-37	Igapo	2019	59	2019-10-18	2019-12-16	2019-12-01	18:17:16	MAMMAL	Frugivore.Granivore	Dasyprocta	leporina	Dasyprocta_leporina	1	undefined
IGA-2-37	Igapo	2019	59	2019-10-18	2019-12-16	2019-10-24	17:55:28	MAMMAL	Frugivore.Granivore	Dasyprocta	leporina	Dasyprocta_leporina	1	undefined
IGA-2-37	Igapo	2019	59	2019-10-18	2019-12-16	2019-11-21	16:38:25	MAMMAL	Frugivore.Granivore	Dasyprocta	leporina	Dasyprocta_leporina	1	undefined
IGA-2-37	Igapo	2019	59	2019-10-18	2019-12-16	2019-11-21	00:54:41	MAMMAL	Frugivore.Omnivore	Didelphis	marsupialis	Didelphis_marsupialis	1	undefined
IGA-2-37	Igapo	2019	59	2019-10-18	2019-12-16	2019-11-05	17:53:37	MAMMAL	Frugivore.Granivore	Dasyprocta	leporina	Dasyprocta_leporina	1	undefined
IGA-2-37	Igapo	2019	59	2019-10-18	2019-12-16	2019-11-19	06:33:08	MAMMAL	Frugivore.Granivore	Dasyprocta	leporina	Dasyprocta_leporina	1	undefined
IGA-2-37	Igapo	2019	59	2019-10-18	2019-12-16	2019-12-05	00:17:09	MAMMAL	Frugivore.Omnivore	Didelphis	marsupialis	Didelphis_marsupialis	1	undefined
IGA-2-37	Igapo	2019	59	2019-10-18	2019-12-16	2019-12-05	13:20:11	MAMMAL	Frugivore.Herbivore	Mazama	nemorivaga	Mazama_nemorivaga	1	undefined
IGA-2-37	Igapo	2019	59	2019-10-18	2019-12-16	2019-11-07	03:06:38	MAMMAL	Frugivore.Herbivore	Cuniculus	paca	Cuniculus_paca	1	undefined
IGA-2-37	Igapo	2019	59	2019-10-18	2019-12-16	2019-11-07	06:36:54	MAMMAL	Frugivore.Granivore	Dasyprocta	leporina	Dasyprocta_leporina	1	undefined
IGA-2-37	Igapo	2019	59	2019-10-18	2019-12-16	2019-11-17	07:55:26	MAMMAL	Frugivore.Granivore	Dasyprocta	leporina	Dasyprocta_leporina	1	undefined
IGA-2-37	Igapo	2019	59	2019-10-18	2019-12-16	2019-12-07	08:47:48	MAMMAL	Frugivore.Granivore	Dasyprocta	leporina	Dasyprocta_leporina	1	undefined
IGA-2-37	Igapo	2019	59	2019-10-18	2019-12-16	2019-12-07	14:55:12	MAMMAL	Frugivore.Herbivore	Dicotyles	tajacu	Dicotyles_tajacu	1	undefined
IGA-2-37	Igapo	2019	59	2019-10-18	2019-12-16	2019-10-18	11:38:35	INSTALL	Setup	Setup	Setup	Setup	1	undefined
IGA-2-37	Igapo	2019	59	2019-10-18	2019-12-16	2019-12-16	09:31:46	INSTALL	Retrieval	Retrieval	Retrieval	Pickup	1	undefined
IGA-2-37	Igapo	2019	59	2019-10-18	2019-12-16	2019-11-16	20:59:12	MAMMAL	Frugivore.Herbivore	Cuniculus	paca	Cuniculus_paca	1	undefined
IGA-2-37	Igapo	2019	59	2019-10-18	2019-12-16	2019-11-16	06:23:15	MAMMAL	Frugivore.Granivore	Dasyprocta	leporina	Dasyprocta_leporina	1	undefined
IGA-2-37	Igapo	2019	59	2019-10-18	2019-12-16	2019-12-08	07:26:29	MAMMAL	Frugivore.Herbivore	Dicotyles	tajacu	Dicotyles_tajacu	2	undefined
IGA-2-37	Igapo	2019	59	2019-10-18	2019-12-16	2019-12-15	07:04:14	MAMMAL	Frugivore.Granivore	Dasyprocta	leporina	Dasyprocta_leporina	1	undefined
IGA-2-37	Igapo	2019	59	2019-10-18	2019-12-16	2019-11-14	10:28:34	MAMMAL	nodata	Sapajus	apella	Sapajus_apella	2	undefined
IGA-2-37	Igapo	2019	59	2019-10-18	2019-12-16	2019-11-13	08:07:15	MAMMAL	Frugivore.Granivore	Dasyprocta	leporina	Dasyprocta_leporina	1	undefined
IGA-1-38	Igapo	2018	75	2018-10-20	2019-01-03	2018-11-08	00:17:58	MAMMAL	Insectivore.Omnivore	Philander	opossum	Philander_opossum	1	undefined
IGA-1-38	Igapo	2018	75	2018-10-20	2019-01-03	2018-12-07	13:42:37	MAMMAL	Frugivore.Granivore	Myoprocta	acouchy	Myoprocta_acouchy	1	undefined
IGA-1-38	Igapo	2018	75	2018-10-20	2019-01-03	2018-12-08	11:31:57	MAMMAL	Frugivore.Granivore	Myoprocta	acouchy	Myoprocta_acouchy	1	undefined
IGA-1-38	Igapo	2018	75	2018-10-20	2019-01-03	2018-12-06	17:55:36	MAMMAL	Frugivore.Granivore	Myoprocta	acouchy	Myoprocta_acouchy	1	undefined
IGA-1-38	Igapo	2018	75	2018-10-20	2019-01-03	2018-12-05	17:52:11	MAMMAL	Frugivore.Granivore	Myoprocta	acouchy	Myoprocta_acouchy	1	undefined
IGA-1-38	Igapo	2018	75	2018-10-20	2019-01-03	2019-01-03	10:06:01	INSTALL	Retrieval	Retrieval	Retrieval	Pickup	1	undefined
IGA-1-38	Igapo	2018	75	2018-10-20	2019-01-03	2018-12-04	20:13:58	MAMMAL	Frugivore.Herbivore	Cuniculus	paca	Cuniculus_paca	1	undefined
IGA-1-38	Igapo	2018	75	2018-10-20	2019-01-03	2018-12-04	05:25:24	MAMMAL	Frugivore.Granivore	Myoprocta	acouchy	Myoprocta_acouchy	1	undefined
IGA-1-38	Igapo	2018	75	2018-10-20	2019-01-03	2018-12-04	17:56:12	MAMMAL	Frugivore.Granivore	Myoprocta	acouchy	Myoprocta_acouchy	1	undefined
IGA-1-38	Igapo	2018	75	2018-10-20	2019-01-03	2018-12-04	01:16:05	MAMMAL	Frugivore.Granivore	Proechimys	spp.	Proechimys_spp.	1	undefined
IGA-1-38	Igapo	2018	75	2018-10-20	2019-01-03	2018-12-11	17:53:16	MAMMAL	Frugivore.Granivore	Myoprocta	acouchy	Myoprocta_acouchy	1	undefined
IGA-1-38	Igapo	2018	75	2018-10-20	2019-01-03	2018-11-04	16:31:22	MAMMAL	Frugivore.Granivore	Myoprocta	acouchy	Myoprocta_acouchy	1	undefined
IGA-1-38	Igapo	2018	75	2018-10-20	2019-01-03	2019-01-02	17:44:50	MAMMAL	Frugivore.Granivore	Myoprocta	acouchy	Myoprocta_acouchy	1	undefined
IGA-1-38	Igapo	2018	75	2018-10-20	2019-01-03	2018-12-03	15:33:46	MAMMAL	Frugivore.Granivore	Myoprocta	acouchy	Myoprocta_acouchy	1	undefined
IGA-1-38	Igapo	2018	75	2018-10-20	2019-01-03	2018-11-03	06:55:03	MAMMAL	Frugivore.Granivore	Myoprocta	acouchy	Myoprocta_acouchy	1	undefined
IGA-1-38	Igapo	2018	75	2018-10-20	2019-01-03	2018-12-02	22:36:07	MAMMAL	Insectivore.Omnivore	Philander	opossum	Philander_opossum	1	undefined
IGA-1-38	Igapo	2018	75	2018-10-20	2019-01-03	2018-12-13	17:54:13	MAMMAL	Frugivore.Granivore	Myoprocta	acouchy	Myoprocta_acouchy	1	undefined
IGA-1-38	Igapo	2018	75	2018-10-20	2019-01-03	2018-11-14	19:54:06	MAMMAL	Insectivore.Omnivore	Philander	opossum	Philander_opossum	1	undefined
IGA-1-38	Igapo	2018	75	2018-10-20	2019-01-03	2018-11-01	05:25:46	MAMMAL	Frugivore.Granivore	Myoprocta	acouchy	Myoprocta_acouchy	1	undefined
IGA-1-38	Igapo	2018	75	2018-10-20	2019-01-03	2018-11-30	05:26:52	MAMMAL	Frugivore.Granivore	Myoprocta	acouchy	Myoprocta_acouchy	1	undefined
IGA-1-38	Igapo	2018	75	2018-10-20	2019-01-03	2018-10-31	00:23:25	MAMMAL	Insectivore.Omnivore	Philander	opossum	Philander_opossum	1	undefined
IGA-1-38	Igapo	2018	75	2018-10-20	2019-01-03	2018-10-31	19:40:47	MAMMAL	Insectivore.Omnivore	Philander	opossum	Philander_opossum	1	undefined
IGA-1-38	Igapo	2018	75	2018-10-20	2019-01-03	2018-12-29	16:25:21	MAMMAL	Frugivore.Granivore	Myoprocta	acouchy	Myoprocta_acouchy	1	undefined
IGA-1-38	Igapo	2018	75	2018-10-20	2019-01-03	2018-12-29	02:11:29	MAMMAL	Frugivore.Granivore	Proechimys	spp.	Proechimys_spp.	1	undefined
IGA-1-38	Igapo	2018	75	2018-10-20	2019-01-03	2018-12-29	22:28:32	MAMMAL	Frugivore.Granivore	Proechimys	spp.	Proechimys_spp.	1	undefined
IGA-1-38	Igapo	2018	75	2018-10-20	2019-01-03	2018-11-16	22:09:40	MAMMAL	Insectivore.Omnivore	Metachirus	nudicaudatus	Metachirus_nudicaudatus	1	undefined
IGA-1-38	Igapo	2018	75	2018-10-20	2019-01-03	2018-11-29	05:30:58	MAMMAL	Frugivore.Granivore	Myoprocta	acouchy	Myoprocta_acouchy	1	undefined
IGA-1-38	Igapo	2018	75	2018-10-20	2019-01-03	2018-12-28	13:56:49	MAMMAL	Frugivore.Granivore	Myoprocta	acouchy	Myoprocta_acouchy	1	undefined
IGA-1-38	Igapo	2018	75	2018-10-20	2019-01-03	2018-11-17	05:34:23	MAMMAL	Frugivore.Granivore	Myoprocta	acouchy	Myoprocta_acouchy	1	undefined
IGA-1-38	Igapo	2018	75	2018-10-20	2019-01-03	2018-11-17	07:09:26	MAMMAL	Frugivore.Granivore	Myoprocta	acouchy	Myoprocta_acouchy	1	undefined
IGA-1-38	Igapo	2018	75	2018-10-20	2019-01-03	2018-11-17	00:04:07	MAMMAL	Insectivore.Omnivore	Philander	opossum	Philander_opossum	1	undefined
IGA-1-38	Igapo	2018	75	2018-10-20	2019-01-03	2018-10-29	05:41:45	MAMMAL	Frugivore.Granivore	Myoprocta	acouchy	Myoprocta_acouchy	1	undefined
IGA-1-38	Igapo	2018	75	2018-10-20	2019-01-03	2018-11-18	05:23:27	MAMMAL	Frugivore.Granivore	Myoprocta	acouchy	Myoprocta_acouchy	1	undefined
IGA-1-38	Igapo	2018	75	2018-10-20	2019-01-03	2018-11-18	03:16:34	MAMMAL	Insectivore.Omnivore	Philander	opossum	Philander_opossum	1	undefined
IGA-1-38	Igapo	2018	75	2018-10-20	2019-01-03	2018-11-18	19:17:14	MAMMAL	Insectivore.Omnivore	Philander	opossum	Philander_opossum	1	undefined
IGA-1-38	Igapo	2018	75	2018-10-20	2019-01-03	2018-11-27	05:15:08	MAMMAL	Frugivore.Granivore	Myoprocta	acouchy	Myoprocta_acouchy	1	undefined
IGA-1-38	Igapo	2018	75	2018-10-20	2019-01-03	2018-11-27	06:17:45	MAMMAL	Frugivore.Granivore	Myoprocta	acouchy	Myoprocta_acouchy	1	undefined
IGA-1-38	Igapo	2018	75	2018-10-20	2019-01-03	2018-12-18	05:35:41	MAMMAL	Frugivore.Granivore	Myoprocta	acouchy	Myoprocta_acouchy	1	undefined
IGA-1-38	Igapo	2018	75	2018-10-20	2019-01-03	2018-10-20	11:33:49	INSTALL	Setup	Setup	Setup	Setup	1	undefined
IGA-1-38	Igapo	2018	75	2018-10-20	2019-01-03	2018-11-19	06:05:34	MAMMAL	Frugivore.Granivore	Myoprocta	acouchy	Myoprocta_acouchy	1	undefined
IGA-1-38	Igapo	2018	75	2018-10-20	2019-01-03	2018-10-21	03:17:44	MAMMAL	Insectivore.Omnivore	Philander	opossum	Philander_opossum	1	undefined
IGA-1-38	Igapo	2018	75	2018-10-20	2019-01-03	2018-10-27	14:19:42	MAMMAL	Frugivore.Granivore	Dasyprocta	leporina	Dasyprocta_leporina	2	undefined
IGA-1-38	Igapo	2018	75	2018-10-20	2019-01-03	2018-11-20	06:55:04	MAMMAL	Frugivore.Granivore	Myoprocta	acouchy	Myoprocta_acouchy	1	undefined
IGA-1-38	Igapo	2018	75	2018-10-20	2019-01-03	2018-11-20	17:00:02	MAMMAL	Frugivore.Granivore	Myoprocta	acouchy	Myoprocta_acouchy	1	undefined
IGA-1-38	Igapo	2018	75	2018-10-20	2019-01-03	2018-11-20	18:04:23	MAMMAL	Frugivore.Granivore	Myoprocta	acouchy	Myoprocta_acouchy	1	undefined
IGA-1-38	Igapo	2018	75	2018-10-20	2019-01-03	2018-11-25	05:25:10	MAMMAL	Frugivore.Granivore	Myoprocta	acouchy	Myoprocta_acouchy	1	undefined
IGA-1-38	Igapo	2018	75	2018-10-20	2019-01-03	2018-10-26	05:41:10	MAMMAL	Frugivore.Granivore	Myoprocta	acouchy	Myoprocta_acouchy	1	undefined
IGA-1-38	Igapo	2018	75	2018-10-20	2019-01-03	2018-11-21	16:44:13	MAMMAL	Frugivore.Granivore	Dasyprocta	leporina	Dasyprocta_leporina	1	undefined
IGA-1-38	Igapo	2018	75	2018-10-20	2019-01-03	2018-11-24	18:09:41	MAMMAL	Frugivore.Granivore	Myoprocta	acouchy	Myoprocta_acouchy	1	undefined
IGA-1-38	Igapo	2018	75	2018-10-20	2019-01-03	2018-11-22	12:49:01	MAMMAL	Frugivore.Granivore	Myoprocta	acouchy	Myoprocta_acouchy	1	undefined
IGA-1-38	Igapo	2018	75	2018-10-20	2019-01-03	2018-11-22	23:32:23	MAMMAL	Frugivore.Granivore	Proechimys	spp.	Proechimys_spp.	1	undefined
IGA-1-38	Igapo	2018	75	2018-10-20	2019-01-03	2018-11-23	05:26:46	MAMMAL	Frugivore.Granivore	Myoprocta	acouchy	Myoprocta_acouchy	1	undefined
IGA-1-38	Igapo	2018	75	2018-10-20	2019-01-03	2018-11-23	17:47:28	MAMMAL	Frugivore.Granivore	Myoprocta	acouchy	Myoprocta_acouchy	1	undefined
IGA-1-38	Igapo	2018	75	2018-10-20	2019-01-03	2018-12-22	18:14:46	MAMMAL	Frugivore.Granivore	Myoprocta	acouchy	Myoprocta_acouchy	1	undefined
IGA-2-38	Igapo	2019	59	2019-10-18	2019-12-16	2019-11-30	10:17:07	MAMMAL	Frugivore.Granivore	Dasyprocta	leporina	Dasyprocta_leporina	1	undefined
IGA-2-38	Igapo	2019	59	2019-10-18	2019-12-16	2019-10-24	22:21:32	MAMMAL	Frugivore.Omnivore	Didelphis	marsupialis	Didelphis_marsupialis	1	undefined
IGA-2-38	Igapo	2019	59	2019-10-18	2019-12-16	2019-10-24	23:39:19	MAMMAL	Frugivore.Granivore	Proechimys	spp.	Proechimys_spp.	1	undefined
IGA-2-38	Igapo	2019	59	2019-10-18	2019-12-16	2019-12-02	19:11:44	MAMMAL	Frugivore.Omnivore	Didelphis	marsupialis	Didelphis_marsupialis	1	undefined
IGA-2-38	Igapo	2019	59	2019-10-18	2019-12-16	2019-12-04	06:02:34	MAMMAL	Frugivore.Herbivore	Mazama	nemorivaga	Mazama_nemorivaga	1	Female
IGA-2-38	Igapo	2019	59	2019-10-18	2019-12-16	2019-10-18	11:02:25	INSTALL	Setup	Setup	Setup	Setup	1	undefined
IGA-2-38	Igapo	2019	59	2019-10-18	2019-12-16	2019-12-16	09:10:09	INSTALL	Retrieval	Retrieval	Retrieval	Pickup	1	undefined
IGA-2-38	Igapo	2019	59	2019-10-18	2019-12-16	2019-12-13	18:47:09	MAMMAL	Insectivore.Omnivore	Philander	opossum	Philander_opossum	1	undefined
IGA-2-38	Igapo	2019	59	2019-10-18	2019-12-16	2019-11-11	11:25:21	MAMMAL	Frugivore.Herbivore	Mazama	nemorivaga	Mazama_nemorivaga	1	Male
IGA-2-38	Igapo	2019	59	2019-10-18	2019-12-16	2019-11-11	12:56:39	MAMMAL	Frugivore.Herbivore	Mazama	nemorivaga	Mazama_nemorivaga	1	Male
IGA-2-38	Igapo	2019	59	2019-10-18	2019-12-16	2019-12-11	15:12:51	MAMMAL	Frugivore.Herbivore	Mazama	americana	Mazama_americana	1	Male
IGA-1-39	Igapo	2018	0	2018-10-20	2018-10-20	2018-10-20	10:58:44	INSTALL	Setup	Setup	Setup	Setup	1	undefined
IGA-2-39	Igapo	2019	59	2019-10-18	2019-12-16	2019-10-28	09:06:37	MAMMAL	Frugivore.Granivore	Dasyprocta	leporina	Dasyprocta_leporina	1	undefined
IGA-2-39	Igapo	2019	59	2019-10-18	2019-12-16	2019-10-31	08:16:58	MAMMAL	Frugivore.Granivore	Dasyprocta	leporina	Dasyprocta_leporina	1	undefined
IGA-2-39	Igapo	2019	59	2019-10-18	2019-12-16	2019-10-31	10:38:45	MAMMAL	Frugivore.Granivore	Dasyprocta	leporina	Dasyprocta_leporina	1	undefined
IGA-2-39	Igapo	2019	59	2019-10-18	2019-12-16	2019-11-02	02:54:20	MAMMAL	Frugivore.Herbivore	Cuniculus	paca	Cuniculus_paca	1	undefined
IGA-2-39	Igapo	2019	59	2019-10-18	2019-12-16	2019-12-05	08:19:15	MAMMAL	Frugivore.Granivore	Dasyprocta	leporina	Dasyprocta_leporina	1	undefined
IGA-2-39	Igapo	2019	59	2019-10-18	2019-12-16	2019-10-20	12:56:33	MAMMAL	Frugivore.Granivore	Dasyprocta	leporina	Dasyprocta_leporina	1	undefined
IGA-2-39	Igapo	2019	59	2019-10-18	2019-12-16	2019-10-19	07:30:33	MAMMAL	Frugivore.Granivore	Dasyprocta	leporina	Dasyprocta_leporina	1	undefined
IGA-2-39	Igapo	2019	59	2019-10-18	2019-12-16	2019-11-07	13:36:20	MAMMAL	Frugivore.Granivore	Dasyprocta	leporina	Dasyprocta_leporina	1	undefined
IGA-2-39	Igapo	2019	59	2019-10-18	2019-12-16	2019-11-17	16:14:59	MAMMAL	nodata	Sapajus	apella	Sapajus_apella	3	undefined
IGA-2-39	Igapo	2019	59	2019-10-18	2019-12-16	2019-10-18	10:31:44	INSTALL	Setup	Setup	Setup	Setup	1	undefined
IGA-2-39	Igapo	2019	59	2019-10-18	2019-12-16	2019-12-16	08:58:49	INSTALL	Retrieval	Retrieval	Retrieval	Pickup	1	undefined
IGA-2-39	Igapo	2019	59	2019-10-18	2019-12-16	2019-11-09	06:35:21	MAMMAL	Frugivore.Granivore	Dasyprocta	leporina	Dasyprocta_leporina	1	undefined
IGA-2-39	Igapo	2019	59	2019-10-18	2019-12-16	2019-12-13	23:23:00	MAMMAL	Frugivore.Omnivore	Didelphis	marsupialis	Didelphis_marsupialis	1	undefined
IGA-1-40	Igapo	2018	75	2018-10-20	2019-01-03	2018-11-08	01:22:52	MAMMAL	Frugivore.Granivore	Proechimys	spp.	Proechimys_spp.	1	undefined
IGA-1-40	Igapo	2018	75	2018-10-20	2019-01-03	2018-12-07	16:23:27	MAMMAL	Frugivore.Granivore	Dasyprocta	leporina	Dasyprocta_leporina	1	undefined
IGA-1-40	Igapo	2018	75	2018-10-20	2019-01-03	2018-12-09	01:07:35	MAMMAL	Insectivore.Omnivore	Metachirus	nudicaudatus	Metachirus_nudicaudatus	1	undefined
IGA-1-40	Igapo	2018	75	2018-10-20	2019-01-03	2018-11-06	22:30:22	MAMMAL	Insectivore.Omnivore	Philander	opossum	Philander_opossum	1	undefined
IGA-1-40	Igapo	2018	75	2018-10-20	2019-01-03	2018-11-06	01:33:59	MAMMAL	Frugivore.Granivore	Proechimys	spp.	Proechimys_spp.	1	undefined
IGA-1-40	Igapo	2018	75	2018-10-20	2019-01-03	2018-11-10	08:55:25	MAMMAL	Frugivore.Granivore	Dasyprocta	leporina	Dasyprocta_leporina	1	undefined
IGA-1-40	Igapo	2018	75	2018-10-20	2019-01-03	2019-01-03	04:35:12	MAMMAL	Frugivore.Granivore	Proechimys	spp.	Proechimys_spp.	1	undefined
IGA-1-40	Igapo	2018	75	2018-10-20	2019-01-03	2019-01-03	10:06:12	INSTALL	Retrieval	Retrieval	Retrieval	Pickup	1	undefined
IGA-1-40	Igapo	2018	75	2018-10-20	2019-01-03	2018-12-04	22:29:34	MAMMAL	Insectivore.Omnivore	Philander	opossum	Philander_opossum	1	undefined
IGA-1-40	Igapo	2018	75	2018-10-20	2019-01-03	2018-11-04	09:07:46	MAMMAL	Frugivore.Granivore	Dasyprocta	leporina	Dasyprocta_leporina	1	undefined
IGA-1-40	Igapo	2018	75	2018-10-20	2019-01-03	2018-12-03	12:48:01	MAMMAL	Frugivore.Granivore	Dasyprocta	leporina	Dasyprocta_leporina	1	undefined
IGA-1-40	Igapo	2018	75	2018-10-20	2019-01-03	2018-12-12	05:31:13	MAMMAL	Frugivore.Granivore	Dasyprocta	leporina	Dasyprocta_leporina	1	undefined
IGA-1-40	Igapo	2018	75	2018-10-20	2019-01-03	2018-12-12	04:17:35	MAMMAL	Insectivore.Omnivore	Philander	opossum	Philander_opossum	1	undefined
IGA-1-40	Igapo	2018	75	2018-10-20	2019-01-03	2018-12-13	18:12:46	MAMMAL	Frugivore.Granivore	Dasyprocta	leporina	Dasyprocta_leporina	1	undefined
IGA-1-40	Igapo	2018	75	2018-10-20	2019-01-03	2018-11-02	15:37:50	MAMMAL	Frugivore.Granivore	Dasyprocta	leporina	Dasyprocta_leporina	1	undefined
IGA-1-40	Igapo	2018	75	2018-10-20	2019-01-03	2018-12-31	06:26:12	MAMMAL	Frugivore.Granivore	Dasyprocta	leporina	Dasyprocta_leporina	1	undefined
IGA-1-40	Igapo	2018	75	2018-10-20	2019-01-03	2018-12-31	20:23:37	MAMMAL	Insectivore.Omnivore	Philander	opossum	Philander_opossum	1	undefined
IGA-1-40	Igapo	2018	75	2018-10-20	2019-01-03	2018-12-31	22:15:39	MAMMAL	Frugivore.Granivore	Proechimys	spp.	Proechimys_spp.	1	undefined
IGA-1-40	Igapo	2018	75	2018-10-20	2019-01-03	2018-12-01	06:45:18	MAMMAL	Frugivore.Granivore	Dasyprocta	leporina	Dasyprocta_leporina	1	undefined
IGA-1-40	Igapo	2018	75	2018-10-20	2019-01-03	2018-12-01	07:57:50	MAMMAL	Frugivore.Granivore	Dasyprocta	leporina	Dasyprocta_leporina	1	undefined
IGA-1-40	Igapo	2018	75	2018-10-20	2019-01-03	2018-11-01	19:04:19	MAMMAL	Insectivore.Omnivore	Philander	opossum	Philander_opossum	1	undefined
IGA-1-40	Igapo	2018	75	2018-10-20	2019-01-03	2018-11-30	12:45:28	MAMMAL	Frugivore.Granivore	Dasyprocta	leporina	Dasyprocta_leporina	1	undefined
IGA-1-40	Igapo	2018	75	2018-10-20	2019-01-03	2018-12-15	15:35:38	MAMMAL	Frugivore.Granivore	Dasyprocta	leporina	Dasyprocta_leporina	1	undefined
IGA-1-40	Igapo	2018	75	2018-10-20	2019-01-03	2018-12-15	17:56:40	MAMMAL	Frugivore.Granivore	Dasyprocta	leporina	Dasyprocta_leporina	1	undefined
IGA-1-40	Igapo	2018	75	2018-10-20	2019-01-03	2018-10-31	20:00:40	MAMMAL	Frugivore.Granivore	Proechimys	spp.	Proechimys_spp.	1	undefined
IGA-1-40	Igapo	2018	75	2018-10-20	2019-01-03	2018-11-16	16:53:09	MAMMAL	Frugivore.Granivore	Dasyprocta	leporina	Dasyprocta_leporina	1	undefined
IGA-1-40	Igapo	2018	75	2018-10-20	2019-01-03	2018-12-16	07:56:15	MAMMAL	Frugivore.Granivore	Dasyprocta	leporina	Dasyprocta_leporina	1	undefined
IGA-1-40	Igapo	2018	75	2018-10-20	2019-01-03	2018-10-30	20:32:48	MAMMAL	Insectivore.Omnivore	Philander	opossum	Philander_opossum	1	undefined
IGA-1-40	Igapo	2018	75	2018-10-20	2019-01-03	2018-11-28	20:08:08	MAMMAL	Insectivore.Omnivore	Philander	opossum	Philander_opossum	1	undefined
IGA-1-40	Igapo	2018	75	2018-10-20	2019-01-03	2018-10-29	14:51:37	MAMMAL	Frugivore.Granivore	Dasyprocta	leporina	Dasyprocta_leporina	1	undefined
IGA-1-40	Igapo	2018	75	2018-10-20	2019-01-03	2018-12-27	23:15:30	MAMMAL	Frugivore.Granivore	Proechimys	spp.	Proechimys_spp.	1	undefined
IGA-1-40	Igapo	2018	75	2018-10-20	2019-01-03	2018-11-27	08:38:32	MAMMAL	Frugivore.Herbivore	Mazama	nemorivaga	Mazama_nemorivaga	1	undefined
IGA-1-40	Igapo	2018	75	2018-10-20	2019-01-03	2018-12-18	14:07:21	MAMMAL	Frugivore.Granivore	Dasyprocta	leporina	Dasyprocta_leporina	1	undefined
IGA-1-40	Igapo	2018	75	2018-10-20	2019-01-03	2018-12-18	02:15:15	MAMMAL	Frugivore.Granivore	Proechimys	spp.	Proechimys_spp.	1	undefined
IGA-1-40	Igapo	2018	75	2018-10-20	2019-01-03	2018-10-20	10:13:29	INSTALL	Setup	Setup	Setup	Setup	1	undefined
IGA-1-40	Igapo	2018	75	2018-10-20	2019-01-03	2018-12-26	15:31:22	MAMMAL	Frugivore.Granivore	Dasyprocta	leporina	Dasyprocta_leporina	1	undefined
IGA-1-40	Igapo	2018	75	2018-10-20	2019-01-03	2018-11-19	03:16:46	MAMMAL	Frugivore.Granivore	Proechimys	spp.	Proechimys_spp.	1	undefined
IGA-1-40	Igapo	2018	75	2018-10-20	2019-01-03	2018-11-26	17:09:55	MAMMAL	Frugivore.Granivore	Dasyprocta	leporina	Dasyprocta_leporina	1	undefined
IGA-1-40	Igapo	2018	75	2018-10-20	2019-01-03	2018-12-19	05:53:14	MAMMAL	Frugivore.Granivore	Dasyprocta	leporina	Dasyprocta_leporina	1	undefined
IGA-1-40	Igapo	2018	75	2018-10-20	2019-01-03	2018-12-19	03:12:12	MAMMAL	Frugivore.Granivore	Proechimys	spp.	Proechimys_spp.	1	undefined
IGA-1-40	Igapo	2018	75	2018-10-20	2019-01-03	2018-10-21	07:22:21	MAMMAL	Frugivore.Granivore	Dasyprocta	leporina	Dasyprocta_leporina	1	undefined
IGA-1-40	Igapo	2018	75	2018-10-20	2019-01-03	2018-10-21	02:30:01	MAMMAL	Insectivore.Omnivore	Philander	opossum	Philander_opossum	1	undefined
IGA-1-40	Igapo	2018	75	2018-10-20	2019-01-03	2018-10-21	04:16:32	MAMMAL	Insectivore.Omnivore	Philander	opossum	Philander_opossum	1	undefined
IGA-1-40	Igapo	2018	75	2018-10-20	2019-01-03	2018-10-27	19:16:05	MAMMAL	Frugivore.Granivore	Proechimys	spp.	Proechimys_spp.	1	undefined
IGA-1-40	Igapo	2018	75	2018-10-20	2019-01-03	2018-10-22	16:08:42	MAMMAL	Frugivore.Granivore	Dasyprocta	leporina	Dasyprocta_leporina	1	undefined
IGA-1-40	Igapo	2018	75	2018-10-20	2019-01-03	2018-10-22	03:08:37	MAMMAL	Insectivore.Omnivore	Philander	opossum	Philander_opossum	1	undefined
IGA-1-40	Igapo	2018	75	2018-10-20	2019-01-03	2018-10-22	04:24:23	MAMMAL	Insectivore.Omnivore	Philander	opossum	Philander_opossum	1	undefined
IGA-1-40	Igapo	2018	75	2018-10-20	2019-01-03	2018-12-24	07:34:02	MAMMAL	Frugivore.Herbivore	Mazama	nemorivaga	Mazama_nemorivaga	1	undefined
IGA-1-40	Igapo	2018	75	2018-10-20	2019-01-03	2018-11-24	10:52:31	MAMMAL	Frugivore.Granivore	Dasyprocta	leporina	Dasyprocta_leporina	1	undefined
IGA-1-40	Igapo	2018	75	2018-10-20	2019-01-03	2018-12-21	17:16:43	MAMMAL	Frugivore.Granivore	Dasyprocta	leporina	Dasyprocta_leporina	1	undefined
IGA-1-40	Igapo	2018	75	2018-10-20	2019-01-03	2018-10-23	15:23:41	MAMMAL	Frugivore.Granivore	Dasyprocta	leporina	Dasyprocta_leporina	1	undefined
IGA-1-40	Igapo	2018	75	2018-10-20	2019-01-03	2018-10-23	16:25:25	MAMMAL	Frugivore.Granivore	Dasyprocta	leporina	Dasyprocta_leporina	1	undefined
IGA-1-40	Igapo	2018	75	2018-10-20	2019-01-03	2018-10-25	05:10:40	MAMMAL	Frugivore.Granivore	Dasyprocta	leporina	Dasyprocta_leporina	1	undefined
IGA-1-40	Igapo	2018	75	2018-10-20	2019-01-03	2018-11-22	09:02:13	MAMMAL	Frugivore.Granivore	Dasyprocta	leporina	Dasyprocta_leporina	1	undefined
IGA-1-40	Igapo	2018	75	2018-10-20	2019-01-03	2018-11-23	01:12:57	MAMMAL	Insectivore.Omnivore	Philander	opossum	Philander_opossum	1	undefined
IGA-1-40	Igapo	2018	75	2018-10-20	2019-01-03	2018-12-22	12:15:02	MAMMAL	Frugivore.Granivore	Dasyprocta	leporina	Dasyprocta_leporina	1	undefined
IGA-1-40	Igapo	2018	75	2018-10-20	2019-01-03	2018-12-22	03:01:20	MAMMAL	Frugivore.Granivore	Proechimys	spp.	Proechimys_spp.	1	undefined
IGA-2-40	Igapo	2019	59	2019-10-18	2019-12-16	2019-11-27	11:05:41	MAMMAL	Frugivore.Granivore	Dasyprocta	leporina	Dasyprocta_leporina	1	undefined
IGA-2-40	Igapo	2019	59	2019-10-18	2019-12-16	2019-10-28	21:30:02	MAMMAL	Frugivore.Herbivore	Cuniculus	paca	Cuniculus_paca	1	undefined
IGA-2-40	Igapo	2019	59	2019-10-18	2019-12-16	2019-10-29	21:40:56	MAMMAL	Frugivore.Herbivore	Cuniculus	paca	Cuniculus_paca	1	undefined
IGA-2-40	Igapo	2019	59	2019-10-18	2019-12-16	2019-11-26	08:49:01	MAMMAL	Frugivore.Granivore	Dasyprocta	leporina	Dasyprocta_leporina	1	undefined
IGA-2-40	Igapo	2019	59	2019-10-18	2019-12-16	2019-11-28	05:52:58	MAMMAL	Frugivore.Granivore	Dasyprocta	leporina	Dasyprocta_leporina	1	undefined
IGA-2-40	Igapo	2019	59	2019-10-18	2019-12-16	2019-10-27	08:31:25	MAMMAL	Frugivore.Granivore	Dasyprocta	leporina	Dasyprocta_leporina	1	undefined
IGA-2-40	Igapo	2019	59	2019-10-18	2019-12-16	2019-11-29	09:18:55	MAMMAL	Frugivore.Granivore	Dasyprocta	leporina	Dasyprocta_leporina	1	undefined
IGA-2-40	Igapo	2019	59	2019-10-18	2019-12-16	2019-10-26	02:29:00	MAMMAL	Frugivore.Herbivore	Cuniculus	paca	Cuniculus_paca	1	undefined
IGA-2-40	Igapo	2019	59	2019-10-18	2019-12-16	2019-10-31	09:51:38	MAMMAL	Frugivore.Granivore	Dasyprocta	leporina	Dasyprocta_leporina	1	undefined
IGA-2-40	Igapo	2019	59	2019-10-18	2019-12-16	2019-10-25	22:54:29	MAMMAL	Frugivore.Herbivore	Cuniculus	paca	Cuniculus_paca	1	undefined
IGA-2-40	Igapo	2019	59	2019-10-18	2019-12-16	2019-11-01	16:40:31	MAMMAL	Frugivore.Granivore	Dasyprocta	leporina	Dasyprocta_leporina	1	undefined
IGA-2-40	Igapo	2019	59	2019-10-18	2019-12-16	2019-11-23	04:30:25	MAMMAL	Frugivore.Herbivore	Dicotyles	tajacu	Dicotyles_tajacu	1	undefined
IGA-2-40	Igapo	2019	59	2019-10-18	2019-12-16	2019-11-22	09:00:42	MAMMAL	Frugivore.Granivore	Dasyprocta	leporina	Dasyprocta_leporina	1	undefined
IGA-2-40	Igapo	2019	59	2019-10-18	2019-12-16	2019-11-22	23:39:33	MAMMAL	Frugivore.Herbivore	Dicotyles	tajacu	Dicotyles_tajacu	1	undefined
IGA-2-40	Igapo	2019	59	2019-10-18	2019-12-16	2019-10-22	02:07:11	MAMMAL	Frugivore.Herbivore	Cuniculus	paca	Cuniculus_paca	1	undefined
IGA-2-40	Igapo	2019	59	2019-10-18	2019-12-16	2019-10-22	20:25:55	MAMMAL	Frugivore.Herbivore	Cuniculus	paca	Cuniculus_paca	1	undefined
IGA-2-40	Igapo	2019	59	2019-10-18	2019-12-16	2019-10-22	08:27:22	MAMMAL	Frugivore.Granivore	Dasyprocta	leporina	Dasyprocta_leporina	2	undefined
IGA-2-40	Igapo	2019	59	2019-10-18	2019-12-16	2019-10-21	17:02:06	MAMMAL	Frugivore.Granivore	Dasyprocta	leporina	Dasyprocta_leporina	1	undefined
IGA-2-40	Igapo	2019	59	2019-10-18	2019-12-16	2019-11-05	08:14:10	MAMMAL	Frugivore.Granivore	Dasyprocta	leporina	Dasyprocta_leporina	1	undefined
IGA-2-40	Igapo	2019	59	2019-10-18	2019-12-16	2019-10-20	23:43:16	MAMMAL	Frugivore.Herbivore	Cuniculus	paca	Cuniculus_paca	1	undefined
IGA-2-40	Igapo	2019	59	2019-10-18	2019-12-16	2019-10-20	06:02:27	MAMMAL	Frugivore.Granivore	Dasyprocta	leporina	Dasyprocta_leporina	1	undefined
IGA-2-40	Igapo	2019	59	2019-10-18	2019-12-16	2019-11-18	16:47:27	MAMMAL	Frugivore.Herbivore	Dicotyles	tajacu	Dicotyles_tajacu	1	undefined
IGA-2-40	Igapo	2019	59	2019-10-18	2019-12-16	2019-11-07	17:59:32	MAMMAL	Frugivore.Granivore	Dasyprocta	leporina	Dasyprocta_leporina	1	undefined
IGA-2-40	Igapo	2019	59	2019-10-18	2019-12-16	2019-10-18	10:09:24	INSTALL	Setup	Setup	Setup	Setup	1	undefined
IGA-2-40	Igapo	2019	59	2019-10-18	2019-12-16	2019-12-16	08:51:28	INSTALL	Retrieval	Retrieval	Retrieval	Pickup	1	undefined
IGA-2-40	Igapo	2019	59	2019-10-18	2019-12-16	2019-11-16	15:42:40	MAMMAL	Frugivore.Granivore	Dasyprocta	leporina	Dasyprocta_leporina	1	undefined
IGA-2-40	Igapo	2019	59	2019-10-18	2019-12-16	2019-11-09	06:44:25	MAMMAL	Frugivore.Granivore	Dasyprocta	leporina	Dasyprocta_leporina	1	undefined
IGA-2-40	Igapo	2019	59	2019-10-18	2019-12-16	2019-12-10	23:44:10	MAMMAL	Carnivore	Leopardus	wiedii	Leopardus_wiedii	1	Male
IGA-2-40	Igapo	2019	59	2019-10-18	2019-12-16	2019-11-13	08:57:09	MAMMAL	Frugivore.Granivore	Dasyprocta	leporina	Dasyprocta_leporina	1	undefined
IGA-2-40	Igapo	2019	59	2019-10-18	2019-12-16	2019-12-11	15:48:49	MAMMAL	Frugivore.Granivore	Dasyprocta	leporina	Dasyprocta_leporina	1	undefined
IGA-2-40	Igapo	2019	59	2019-10-18	2019-12-16	2019-12-12	08:07:05	MAMMAL	Frugivore.Granivore	Dasyprocta	leporina	Dasyprocta_leporina	1	undefined
IGA-2-40	Igapo	2019	59	2019-10-18	2019-12-16	2019-11-12	08:30:29	MAMMAL	Frugivore.Granivore	Dasyprocta	leporina	Dasyprocta_leporina	1	undefined
TF-1-01	Terra_firme	2018	106	2018-06-30	2018-10-14	2018-08-19	05:58:29	MAMMAL	Frugivore.Granivore	Myoprocta	acouchy	Myoprocta_acouchy	1	undefined
TF-1-01	Terra_firme	2018	106	2018-06-30	2018-10-14	2018-07-31	17:07:46	MAMMAL	Frugivore.Granivore	Myoprocta	acouchy	Myoprocta_acouchy	1	undefined
TF-1-01	Terra_firme	2018	106	2018-06-30	2018-10-14	2018-08-09	11:31:23	MAMMAL	Frugivore.Granivore	Myoprocta	acouchy	Myoprocta_acouchy	1	undefined
TF-1-01	Terra_firme	2018	106	2018-06-30	2018-10-14	2018-09-02	07:23:55	MAMMAL	Frugivore.Granivore	Myoprocta	acouchy	Myoprocta_acouchy	1	undefined
TF-1-01	Terra_firme	2018	106	2018-06-30	2018-10-14	2018-07-27	04:05:46	MAMMAL	Frugivore.Granivore	Proechimys	spp.	Proechimys_spp.	1	undefined
TF-1-01	Terra_firme	2018	106	2018-06-30	2018-10-14	2018-09-02	06:02:31	MAMMAL	Frugivore.Granivore	Myoprocta	acouchy	Myoprocta_acouchy	1	undefined
TF-1-01	Terra_firme	2018	106	2018-06-30	2018-10-14	2018-08-15	05:56:37	MAMMAL	Frugivore.Granivore	Myoprocta	acouchy	Myoprocta_acouchy	1	undefined
TF-1-01	Terra_firme	2018	106	2018-06-30	2018-10-14	2018-08-13	08:32:50	INSTALL	Setup	Setup	Setup	Setup	1	undefined
TF-1-01	Terra_firme	2018	106	2018-06-30	2018-10-14	2018-09-27	17:58:31	MAMMAL	Frugivore.Granivore	Myoprocta	acouchy	Myoprocta_acouchy	1	undefined
TF-1-01	Terra_firme	2018	106	2018-06-30	2018-10-14	2018-08-19	21:23:02	MAMMAL	Frugivore.Omnivore	Didelphis	marsupialis	Didelphis_marsupialis	1	undefined
TF-1-01	Terra_firme	2018	106	2018-06-30	2018-10-14	2018-09-17	17:23:28	MAMMAL	Frugivore.Granivore	Myoprocta	acouchy	Myoprocta_acouchy	1	undefined
TF-1-01	Terra_firme	2018	106	2018-06-30	2018-10-14	2018-10-11	06:18:05	MAMMAL	Frugivore.Granivore	Myoprocta	acouchy	Myoprocta_acouchy	1	undefined
TF-1-01	Terra_firme	2018	106	2018-06-30	2018-10-14	2018-07-11	00:10:08	MAMMAL	Frugivore.Granivore	Proechimys	spp.	Proechimys_spp.	1	undefined
TF-1-01	Terra_firme	2018	106	2018-06-30	2018-10-14	2018-07-08	18:03:56	MAMMAL	Frugivore.Granivore	Myoprocta	acouchy	Myoprocta_acouchy	1	undefined
TF-1-01	Terra_firme	2018	106	2018-06-30	2018-10-14	2018-07-17	06:14:08	MAMMAL	Frugivore.Granivore	Myoprocta	acouchy	Myoprocta_acouchy	1	undefined
TF-1-01	Terra_firme	2018	106	2018-06-30	2018-10-14	2018-09-15	15:19:17	MAMMAL	Frugivore.Granivore	Myoprocta	acouchy	Myoprocta_acouchy	1	undefined
TF-1-01	Terra_firme	2018	106	2018-06-30	2018-10-14	2018-09-25	06:19:20	MAMMAL	Frugivore.Granivore	Myoprocta	acouchy	Myoprocta_acouchy	1	undefined
TF-1-01	Terra_firme	2018	106	2018-06-30	2018-10-14	2018-08-11	06:54:11	MAMMAL	Frugivore.Granivore	Myoprocta	acouchy	Myoprocta_acouchy	1	undefined
TF-1-01	Terra_firme	2018	106	2018-06-30	2018-10-14	2018-08-16	18:01:42	MAMMAL	Frugivore.Granivore	Myoprocta	acouchy	Myoprocta_acouchy	1	undefined
TF-1-01	Terra_firme	2018	106	2018-06-30	2018-10-14	2018-09-24	17:57:48	MAMMAL	Frugivore.Granivore	Myoprocta	acouchy	Myoprocta_acouchy	1	undefined
TF-1-01	Terra_firme	2018	106	2018-06-30	2018-10-14	2018-09-08	21:36:52	MAMMAL	Frugivore.Omnivore	Didelphis	marsupialis	Didelphis_marsupialis	1	undefined
TF-1-01	Terra_firme	2018	106	2018-06-30	2018-10-14	2018-07-16	03:30:14	MAMMAL	Frugivore.Omnivore	Didelphis	marsupialis	Didelphis_marsupialis	1	undefined
TF-1-01	Terra_firme	2018	106	2018-06-30	2018-10-14	2018-07-27	18:56:54	MAMMAL	nodata	Oecomys	spp.	Oecomys_spp.	1	undefined
TF-1-01	Terra_firme	2018	106	2018-06-30	2018-10-14	2018-10-08	18:03:57	MAMMAL	Frugivore.Granivore	Myoprocta	acouchy	Myoprocta_acouchy	1	undefined
TF-1-01	Terra_firme	2018	106	2018-06-30	2018-10-14	2018-07-12	05:50:29	MAMMAL	Frugivore.Granivore	Myoprocta	acouchy	Myoprocta_acouchy	1	undefined
TF-1-01	Terra_firme	2018	106	2018-06-30	2018-10-14	2018-08-29	14:08:08	MAMMAL	Frugivore.Granivore	Myoprocta	acouchy	Myoprocta_acouchy	1	undefined
TF-1-01	Terra_firme	2018	106	2018-06-30	2018-10-14	2018-08-11	17:54:16	MAMMAL	Frugivore.Granivore	Myoprocta	acouchy	Myoprocta_acouchy	1	undefined
TF-1-01	Terra_firme	2018	106	2018-06-30	2018-10-14	2018-10-12	09:08:37	MAMMAL	Frugivore.Granivore	Myoprocta	acouchy	Myoprocta_acouchy	1	undefined
TF-1-01	Terra_firme	2018	106	2018-06-30	2018-10-14	2018-09-27	06:11:11	MAMMAL	Frugivore.Granivore	Myoprocta	acouchy	Myoprocta_acouchy	1	undefined
TF-1-01	Terra_firme	2018	106	2018-06-30	2018-10-14	2018-08-10	13:31:08	MAMMAL	Insectivore	Myrmecophaga	tridactyla	Myrmecophaga_tridactyla	1	undefined
TF-1-01	Terra_firme	2018	106	2018-06-30	2018-10-14	2018-07-03	21:05:12	MAMMAL	Insectivore.Omnivore	Philander	opossum	Philander_opossum	1	undefined
TF-1-01	Terra_firme	2018	106	2018-06-30	2018-10-14	2018-07-03	22:26:41	MAMMAL	Insectivore.Omnivore	Philander	opossum	Philander_opossum	1	undefined
TF-1-01	Terra_firme	2018	106	2018-06-30	2018-10-14	2018-07-13	06:12:17	MAMMAL	Frugivore.Granivore	Myoprocta	acouchy	Myoprocta_acouchy	1	undefined
TF-1-01	Terra_firme	2018	106	2018-06-30	2018-10-14	2018-07-01	02:28:45	MAMMAL	nodata	Oecomys	spp.	Oecomys_spp.	1	undefined
TF-1-01	Terra_firme	2018	106	2018-06-30	2018-10-14	2018-10-13	23:36:22	MAMMAL	Frugivore.Herbivore	Cuniculus	paca	Cuniculus_paca	1	undefined
TF-1-01	Terra_firme	2018	106	2018-06-30	2018-10-14	2018-07-03	05:40:25	MAMMAL	Frugivore.Granivore	Myoprocta	acouchy	Myoprocta_acouchy	1	undefined
TF-1-01	Terra_firme	2018	106	2018-06-30	2018-10-14	2018-08-14	08:32:05	MAMMAL	Frugivore.Granivore	Myoprocta	acouchy	Myoprocta_acouchy	1	undefined
TF-1-01	Terra_firme	2018	106	2018-06-30	2018-10-14	2018-07-16	01:50:21	MAMMAL	Frugivore.Omnivore	Didelphis	marsupialis	Didelphis_marsupialis	1	undefined
TF-1-01	Terra_firme	2018	106	2018-06-30	2018-10-14	2018-08-31	17:21:01	MAMMAL	Frugivore.Granivore	Myoprocta	acouchy	Myoprocta_acouchy	1	undefined
TF-1-01	Terra_firme	2018	106	2018-06-30	2018-10-14	2018-07-05	02:40:04	MAMMAL	Frugivore.Omnivore	Didelphis	marsupialis	Didelphis_marsupialis	1	undefined
TF-1-01	Terra_firme	2018	106	2018-06-30	2018-10-14	2018-09-06	14:18:00	MAMMAL	Frugivore.Herbivore	Mazama	nemorivaga	Mazama_nemorivaga	1	Female
TF-1-01	Terra_firme	2018	106	2018-06-30	2018-10-14	2018-07-24	05:55:16	MAMMAL	Frugivore.Granivore	Myoprocta	acouchy	Myoprocta_acouchy	1	undefined
TF-1-01	Terra_firme	2018	106	2018-06-30	2018-10-14	2018-09-02	07:26:18	MAMMAL	Frugivore.Granivore	Myoprocta	acouchy	Myoprocta_acouchy	1	undefined
TF-1-01	Terra_firme	2018	106	2018-06-30	2018-10-14	2018-09-13	11:31:59	MAMMAL	Frugivore.Granivore	Myoprocta	acouchy	Myoprocta_acouchy	1	undefined
TF-1-01	Terra_firme	2018	106	2018-06-30	2018-10-14	2018-07-22	19:12:04	MAMMAL	Frugivore.Granivore	Proechimys	spp.	Proechimys_spp.	1	undefined
TF-1-01	Terra_firme	2018	106	2018-06-30	2018-10-14	2018-08-24	19:22:47	MAMMAL	Frugivore.Omnivore	Didelphis	marsupialis	Didelphis_marsupialis	1	undefined
TF-1-01	Terra_firme	2018	106	2018-06-30	2018-10-14	2018-09-22	06:10:21	MAMMAL	Frugivore.Granivore	Myoprocta	acouchy	Myoprocta_acouchy	1	undefined
TF-1-01	Terra_firme	2018	106	2018-06-30	2018-10-14	2018-09-13	18:02:58	MAMMAL	Frugivore.Granivore	Proechimys	spp.	Proechimys_spp.	1	undefined
TF-1-01	Terra_firme	2018	106	2018-06-30	2018-10-14	2018-07-31	06:13:43	MAMMAL	Frugivore.Granivore	Myoprocta	acouchy	Myoprocta_acouchy	1	undefined
TF-1-01	Terra_firme	2018	106	2018-06-30	2018-10-14	2018-08-08	09:52:44	MAMMAL	Frugivore.Granivore	Myoprocta	acouchy	Myoprocta_acouchy	1	undefined
TF-1-01	Terra_firme	2018	106	2018-06-30	2018-10-14	2018-08-30	08:10:22	MAMMAL	Frugivore.Granivore	Myoprocta	acouchy	Myoprocta_acouchy	1	undefined
TF-1-01	Terra_firme	2018	106	2018-06-30	2018-10-14	2018-08-03	23:40:47	MAMMAL	Frugivore.Omnivore	Didelphis	marsupialis	Didelphis_marsupialis	1	undefined
TF-1-01	Terra_firme	2018	106	2018-06-30	2018-10-14	2018-08-03	18:06:28	MAMMAL	Frugivore.Granivore	Myoprocta	acouchy	Myoprocta_acouchy	1	undefined
TF-1-01	Terra_firme	2018	106	2018-06-30	2018-10-14	2018-08-22	00:50:45	MAMMAL	Frugivore.Omnivore	Didelphis	marsupialis	Didelphis_marsupialis	1	undefined
TF-1-01	Terra_firme	2018	106	2018-06-30	2018-10-14	2018-08-20	06:00:11	MAMMAL	Frugivore.Granivore	Myoprocta	acouchy	Myoprocta_acouchy	1	undefined
TF-1-01	Terra_firme	2018	106	2018-06-30	2018-10-14	2018-08-22	17:47:49	MAMMAL	Frugivore.Granivore	Myoprocta	acouchy	Myoprocta_acouchy	1	undefined
TF-1-01	Terra_firme	2018	106	2018-06-30	2018-10-14	2018-07-28	04:23:23	MAMMAL	Insectivore.Omnivore	Dasypus	spp.	Dasypus_spp.	1	undefined
TF-1-01	Terra_firme	2018	106	2018-06-30	2018-10-14	2018-07-24	20:44:33	MAMMAL	Frugivore.Omnivore	Didelphis	marsupialis	Didelphis_marsupialis	1	undefined
TF-1-01	Terra_firme	2018	106	2018-06-30	2018-10-14	2018-07-24	18:43:50	MAMMAL	nodata	Oecomys	spp.	Oecomys_spp.	1	undefined
TF-1-01	Terra_firme	2018	106	2018-06-30	2018-10-14	2018-07-14	00:31:24	MAMMAL	Frugivore.Omnivore	Didelphis	marsupialis	Didelphis_marsupialis	1	undefined
TF-1-01	Terra_firme	2018	106	2018-06-30	2018-10-14	2018-07-01	05:29:27	MAMMAL	nodata	Oecomys	spp.	Oecomys_spp.	1	undefined
TF-1-01	Terra_firme	2018	106	2018-06-30	2018-10-14	2018-08-23	10:15:08	MAMMAL	Frugivore.Granivore	Dasyprocta	leporina	Dasyprocta_leporina	1	undefined
TF-1-01	Terra_firme	2018	106	2018-06-30	2018-10-14	2018-09-29	06:12:08	MAMMAL	Frugivore.Granivore	Myoprocta	acouchy	Myoprocta_acouchy	1	undefined
TF-1-01	Terra_firme	2018	106	2018-06-30	2018-10-14	2018-07-15	03:30:49	MAMMAL	Frugivore.Herbivore	Cuniculus	paca	Cuniculus_paca	1	undefined
TF-1-01	Terra_firme	2018	106	2018-06-30	2018-10-14	2018-08-16	08:21:28	MAMMAL	Frugivore.Granivore	Myoprocta	acouchy	Myoprocta_acouchy	1	undefined
TF-1-01	Terra_firme	2018	106	2018-06-30	2018-10-14	2018-09-10	15:12:29	MAMMAL	Frugivore.Granivore	Myoprocta	acouchy	Myoprocta_acouchy	1	undefined
TF-1-01	Terra_firme	2018	106	2018-06-30	2018-10-14	2018-09-21	02:11:42	MAMMAL	Frugivore.Omnivore	Didelphis	marsupialis	Didelphis_marsupialis	1	undefined
TF-1-01	Terra_firme	2018	106	2018-06-30	2018-10-14	2018-09-21	21:17:27	MAMMAL	Frugivore.Granivore	Proechimys	spp.	Proechimys_spp.	1	undefined
TF-1-01	Terra_firme	2018	106	2018-06-30	2018-10-14	2018-09-02	18:36:57	MAMMAL	Frugivore.Omnivore	Didelphis	marsupialis	Didelphis_marsupialis	1	undefined
TF-1-01	Terra_firme	2018	106	2018-06-30	2018-10-14	2018-08-14	10:11:19	MAMMAL	Frugivore.Granivore	Dasyprocta	leporina	Dasyprocta_leporina	1	undefined
TF-1-01	Terra_firme	2018	106	2018-06-30	2018-10-14	2018-08-08	06:16:27	MAMMAL	Frugivore.Granivore	Myoprocta	acouchy	Myoprocta_acouchy	1	undefined
TF-1-01	Terra_firme	2018	106	2018-06-30	2018-10-14	2018-08-15	10:11:28	MAMMAL	Frugivore.Granivore	Myoprocta	acouchy	Myoprocta_acouchy	1	undefined
TF-1-01	Terra_firme	2018	106	2018-06-30	2018-10-14	2018-07-06	00:07:24	MAMMAL	Frugivore.Herbivore	Cuniculus	paca	Cuniculus_paca	1	undefined
TF-1-01	Terra_firme	2018	106	2018-06-30	2018-10-14	2018-06-30	06:20:05	MAMMAL	Frugivore.Granivore	Myoprocta	acouchy	Myoprocta_acouchy	1	undefined
TF-1-01	Terra_firme	2018	106	2018-06-30	2018-10-14	2018-07-13	16:48:13	MAMMAL	Frugivore.Granivore	Dasyprocta	leporina	Dasyprocta_leporina	1	undefined
TF-1-01	Terra_firme	2018	106	2018-06-30	2018-10-14	2018-07-24	03:53:18	MAMMAL	Frugivore.Omnivore	Didelphis	marsupialis	Didelphis_marsupialis	1	undefined
TF-1-01	Terra_firme	2018	106	2018-06-30	2018-10-14	2018-07-02	05:39:21	MAMMAL	Frugivore.Granivore	Myoprocta	acouchy	Myoprocta_acouchy	1	undefined
TF-1-01	Terra_firme	2018	106	2018-06-30	2018-10-14	2018-07-02	05:38:32	MAMMAL	Frugivore.Granivore	Myoprocta	acouchy	Myoprocta_acouchy	1	undefined
TF-1-01	Terra_firme	2018	106	2018-06-30	2018-10-14	2018-07-13	22:53:07	MAMMAL	Insectivore.Omnivore	Dasypus	spp.	Dasypus_spp.	1	undefined
TF-1-01	Terra_firme	2018	106	2018-06-30	2018-10-14	2018-07-31	06:14:01	MAMMAL	Frugivore.Granivore	Myoprocta	acouchy	Myoprocta_acouchy	1	undefined
TF-1-01	Terra_firme	2018	106	2018-06-30	2018-10-14	2018-07-25	22:04:21	MAMMAL	Frugivore.Omnivore	Didelphis	marsupialis	Didelphis_marsupialis	1	undefined
TF-1-01	Terra_firme	2018	106	2018-06-30	2018-10-14	2018-09-14	06:03:41	MAMMAL	Frugivore.Granivore	Myoprocta	acouchy	Myoprocta_acouchy	1	undefined
TF-1-01	Terra_firme	2018	106	2018-06-30	2018-10-14	2018-07-13	05:50:55	MAMMAL	Frugivore.Granivore	Myoprocta	acouchy	Myoprocta_acouchy	1	undefined
TF-1-01	Terra_firme	2018	106	2018-06-30	2018-10-14	2018-09-20	10:50:59	MAMMAL	Frugivore.Granivore	Myoprocta	acouchy	Myoprocta_acouchy	1	undefined
TF-1-01	Terra_firme	2018	106	2018-06-30	2018-10-14	2018-09-21	06:09:15	MAMMAL	Frugivore.Granivore	Myoprocta	acouchy	Myoprocta_acouchy	1	undefined
TF-1-01	Terra_firme	2018	106	2018-06-30	2018-10-14	2018-07-14	05:52:37	MAMMAL	Frugivore.Granivore	Myoprocta	acouchy	Myoprocta_acouchy	1	undefined
TF-1-01	Terra_firme	2018	106	2018-06-30	2018-10-14	2018-09-10	21:03:00	MAMMAL	Insectivore.Omnivore	Metachirus	nudicaudatus	Metachirus_nudicaudatus	1	undefined
TF-1-01	Terra_firme	2018	106	2018-06-30	2018-10-14	2018-09-10	17:48:14	MAMMAL	Frugivore.Granivore	Myoprocta	acouchy	Myoprocta_acouchy	1	undefined
TF-1-01	Terra_firme	2018	106	2018-06-30	2018-10-14	2018-07-20	06:36:12	MAMMAL	Frugivore.Granivore	Myoprocta	acouchy	Myoprocta_acouchy	1	undefined
TF-1-01	Terra_firme	2018	106	2018-06-30	2018-10-14	2018-09-14	17:59:12	MAMMAL	Frugivore.Granivore	Myoprocta	acouchy	Myoprocta_acouchy	1	undefined
TF-1-01	Terra_firme	2018	106	2018-06-30	2018-10-14	2018-07-03	02:35:40	MAMMAL	Insectivore.Omnivore	Philander	opossum	Philander_opossum	1	undefined
TF-1-01	Terra_firme	2018	106	2018-06-30	2018-10-14	2018-08-06	18:05:18	MAMMAL	Frugivore.Granivore	Myoprocta	acouchy	Myoprocta_acouchy	1	undefined
TF-1-01	Terra_firme	2018	106	2018-06-30	2018-10-14	2018-08-07	13:11:51	MAMMAL	Frugivore.Granivore	Myoprocta	acouchy	Myoprocta_acouchy	1	undefined
TF-1-01	Terra_firme	2018	106	2018-06-30	2018-10-14	2018-09-01	07:18:48	MAMMAL	Frugivore.Granivore	Myoprocta	acouchy	Myoprocta_acouchy	1	undefined
TF-1-01	Terra_firme	2018	106	2018-06-30	2018-10-14	2018-07-13	05:51:18	MAMMAL	Frugivore.Granivore	Myoprocta	acouchy	Myoprocta_acouchy	1	undefined
TF-1-01	Terra_firme	2018	106	2018-06-30	2018-10-14	2018-07-29	06:36:47	MAMMAL	Frugivore.Granivore	Myoprocta	acouchy	Myoprocta_acouchy	1	undefined
TF-1-01	Terra_firme	2018	106	2018-06-30	2018-10-14	2018-07-03	02:32:36	MAMMAL	Frugivore.Granivore	Proechimys	spp.	Proechimys_spp.	1	undefined
TF-1-01	Terra_firme	2018	106	2018-06-30	2018-10-14	2018-07-14	06:33:47	MAMMAL	Frugivore.Granivore	Myoprocta	acouchy	Myoprocta_acouchy	1	undefined
TF-1-01	Terra_firme	2018	106	2018-06-30	2018-10-14	2018-10-14	00:44:43	MAMMAL	Frugivore.Herbivore	Cuniculus	paca	Cuniculus_paca	1	undefined
TF-1-01	Terra_firme	2018	106	2018-06-30	2018-10-14	2018-10-14	02:05:47	MAMMAL	Frugivore.Herbivore	Cuniculus	paca	Cuniculus_paca	1	undefined
TF-1-01	Terra_firme	2018	106	2018-06-30	2018-10-14	2018-07-13	08:10:22	MAMMAL	Frugivore.Granivore	Myoprocta	acouchy	Myoprocta_acouchy	1	undefined
TF-1-01	Terra_firme	2018	106	2018-06-30	2018-10-14	2018-09-26	12:11:38	INSTALL	Retrieval	Retrieval	Retrieval	Pickup	1	undefined
TF-1-01	Terra_firme	2018	106	2018-06-30	2018-10-14	2018-08-29	21:04:04	MAMMAL	Frugivore.Omnivore	Didelphis	marsupialis	Didelphis_marsupialis	1	undefined
TF-1-01	Terra_firme	2018	106	2018-06-30	2018-10-14	2018-07-28	16:51:44	MAMMAL	Frugivore.Granivore	Myoprocta	acouchy	Myoprocta_acouchy	1	undefined
TF-1-01	Terra_firme	2018	106	2018-06-30	2018-10-14	2018-07-11	09:37:01	MAMMAL	Frugivore.Granivore	Myoprocta	acouchy	Myoprocta_acouchy	1	undefined
TF-1-01	Terra_firme	2018	106	2018-06-30	2018-10-14	2018-08-21	06:02:32	MAMMAL	Frugivore.Granivore	Myoprocta	acouchy	Myoprocta_acouchy	1	undefined
TF-1-01	Terra_firme	2018	106	2018-06-30	2018-10-14	2018-07-02	01:25:04	MAMMAL	Frugivore.Granivore	Proechimys	spp.	Proechimys_spp.	1	undefined
TF-1-01	Terra_firme	2018	106	2018-06-30	2018-10-14	2018-08-10	22:22:03	MAMMAL	Insectivore.Omnivore	Dasypus	spp.	Dasypus_spp.	1	undefined
TF-1-01	Terra_firme	2018	106	2018-06-30	2018-10-14	2018-08-10	00:25:50	MAMMAL	Insectivore.Omnivore	Metachirus	nudicaudatus	Metachirus_nudicaudatus	1	undefined
TF-1-01	Terra_firme	2018	106	2018-06-30	2018-10-14	2018-08-10	18:01:12	MAMMAL	Frugivore.Granivore	Myoprocta	acouchy	Myoprocta_acouchy	1	undefined
TF-1-01	Terra_firme	2018	106	2018-06-30	2018-10-14	2018-08-28	07:17:23	MAMMAL	Frugivore.Granivore	Myoprocta	acouchy	Myoprocta_acouchy	1	undefined
TF-1-01	Terra_firme	2018	106	2018-06-30	2018-10-14	2018-07-24	03:45:34	MAMMAL	Frugivore.Herbivore	Cuniculus	paca	Cuniculus_paca	1	undefined
TF-1-01	Terra_firme	2018	106	2018-06-30	2018-10-14	2018-07-18	05:52:34	MAMMAL	Frugivore.Granivore	Myoprocta	acouchy	Myoprocta_acouchy	1	undefined
TF-1-01	Terra_firme	2018	106	2018-06-30	2018-10-14	2018-08-24	07:13:22	MAMMAL	Frugivore.Granivore	Myoprocta	acouchy	Myoprocta_acouchy	1	undefined
TF-1-01	Terra_firme	2018	106	2018-06-30	2018-10-14	2018-07-15	03:20:17	MAMMAL	Frugivore.Omnivore	Didelphis	marsupialis	Didelphis_marsupialis	1	undefined
TF-1-01	Terra_firme	2018	106	2018-06-30	2018-10-14	2018-09-06	02:20:12	MAMMAL	Frugivore.Omnivore	Didelphis	marsupialis	Didelphis_marsupialis	1	undefined
TF-1-01	Terra_firme	2018	106	2018-06-30	2018-10-14	2018-09-06	18:20:14	MAMMAL	Frugivore.Omnivore	Didelphis	marsupialis	Didelphis_marsupialis	1	undefined
TF-1-01	Terra_firme	2018	106	2018-06-30	2018-10-14	2018-08-10	05:55:20	MAMMAL	Frugivore.Granivore	Myoprocta	acouchy	Myoprocta_acouchy	1	undefined
TF-1-01	Terra_firme	2018	106	2018-06-30	2018-10-14	2018-08-19	08:03:57	MAMMAL	Frugivore.Granivore	Myoprocta	acouchy	Myoprocta_acouchy	1	undefined
TF-1-01	Terra_firme	2018	106	2018-06-30	2018-10-14	2018-07-03	05:44:45	MAMMAL	Frugivore.Granivore	Myoprocta	acouchy	Myoprocta_acouchy	1	undefined
TF-1-01	Terra_firme	2018	106	2018-06-30	2018-10-14	2018-08-15	06:54:49	MAMMAL	Frugivore.Granivore	Myoprocta	acouchy	Myoprocta_acouchy	1	undefined
TF-1-01	Terra_firme	2018	106	2018-06-30	2018-10-14	2018-07-29	18:31:03	MAMMAL	Frugivore.Omnivore	Didelphis	marsupialis	Didelphis_marsupialis	1	undefined
TF-1-01	Terra_firme	2018	106	2018-06-30	2018-10-14	2018-09-10	06:17:46	MAMMAL	Frugivore.Granivore	Myoprocta	acouchy	Myoprocta_acouchy	1	undefined
TF-1-01	Terra_firme	2018	106	2018-06-30	2018-10-14	2018-07-02	05:39:10	MAMMAL	Frugivore.Granivore	Myoprocta	acouchy	Myoprocta_acouchy	1	undefined
TF-1-01	Terra_firme	2018	106	2018-06-30	2018-10-14	2018-09-23	07:39:38	MAMMAL	Frugivore.Granivore	Myoprocta	acouchy	Myoprocta_acouchy	1	undefined
TF-1-01	Terra_firme	2018	106	2018-06-30	2018-10-14	2018-08-14	16:59:34	MAMMAL	Frugivore.Granivore	Myoprocta	acouchy	Myoprocta_acouchy	1	undefined
TF-1-01	Terra_firme	2018	106	2018-06-30	2018-10-14	2018-08-18	13:56:50	MAMMAL	Frugivore.Granivore	Myoprocta	acouchy	Myoprocta_acouchy	1	undefined
TF-1-01	Terra_firme	2018	106	2018-06-30	2018-10-14	2018-09-24	06:19:02	MAMMAL	Frugivore.Granivore	Myoprocta	acouchy	Myoprocta_acouchy	1	undefined
TF-1-01	Terra_firme	2018	106	2018-06-30	2018-10-14	2018-07-10	18:23:19	MAMMAL	Frugivore.Omnivore	Nasua	nasua	Nasua_nasua	1	undefined
TF-1-01	Terra_firme	2018	106	2018-06-30	2018-10-14	2018-08-13	13:33:45	MAMMAL	Frugivore.Granivore	Dasyprocta	leporina	Dasyprocta_leporina	1	undefined
TF-1-01	Terra_firme	2018	106	2018-06-30	2018-10-14	2018-08-08	06:16:20	MAMMAL	Frugivore.Granivore	Myoprocta	acouchy	Myoprocta_acouchy	1	undefined
TF-1-01	Terra_firme	2018	106	2018-06-30	2018-10-14	2018-07-28	18:43:37	MAMMAL	nodata	Oecomys	spp.	Oecomys_spp.	1	undefined
TF-1-01	Terra_firme	2018	106	2018-06-30	2018-10-14	2018-08-18	22:53:14	MAMMAL	Frugivore.Omnivore	Didelphis	marsupialis	Didelphis_marsupialis	1	undefined
TF-1-01	Terra_firme	2018	106	2018-06-30	2018-10-14	2018-09-28	07:40:12	MAMMAL	Frugivore.Granivore	Dasyprocta	leporina	Dasyprocta_leporina	1	undefined
TF-1-01	Terra_firme	2018	106	2018-06-30	2018-10-14	2018-07-08	05:45:01	MAMMAL	Frugivore.Granivore	Myoprocta	acouchy	Myoprocta_acouchy	1	undefined
TF-1-01	Terra_firme	2018	106	2018-06-30	2018-10-14	2018-08-26	17:15:10	MAMMAL	Frugivore.Granivore	Myoprocta	acouchy	Myoprocta_acouchy	1	undefined
TF-1-01	Terra_firme	2018	106	2018-06-30	2018-10-14	2018-09-14	06:17:59	MAMMAL	Frugivore.Granivore	Myoprocta	acouchy	Myoprocta_acouchy	1	undefined
TF-1-01	Terra_firme	2018	106	2018-06-30	2018-10-14	2018-07-15	10:55:21	MAMMAL	Frugivore.Granivore	Myoprocta	acouchy	Myoprocta_acouchy	1	undefined
TF-1-01	Terra_firme	2018	106	2018-06-30	2018-10-14	2018-08-03	05:56:20	MAMMAL	Frugivore.Granivore	Myoprocta	acouchy	Myoprocta_acouchy	1	undefined
TF-1-01	Terra_firme	2018	106	2018-06-30	2018-10-14	2018-09-01	17:20:30	MAMMAL	Frugivore.Granivore	Myoprocta	acouchy	Myoprocta_acouchy	1	undefined
TF-1-01	Terra_firme	2018	106	2018-06-30	2018-10-14	2018-09-11	10:30:18	MAMMAL	Frugivore.Granivore	Myoprocta	acouchy	Myoprocta_acouchy	1	undefined
TF-1-01	Terra_firme	2018	106	2018-06-30	2018-10-14	2018-07-18	01:24:24	MAMMAL	Frugivore.Omnivore	Didelphis	marsupialis	Didelphis_marsupialis	1	undefined
TF-1-01	Terra_firme	2018	106	2018-06-30	2018-10-14	2018-06-30	16:39:25	MAMMAL	Frugivore.Granivore	Myoprocta	acouchy	Myoprocta_acouchy	1	undefined
TF-1-01	Terra_firme	2018	106	2018-06-30	2018-10-14	2018-07-31	06:46:19	MAMMAL	Frugivore.Granivore	Myoprocta	acouchy	Myoprocta_acouchy	1	undefined
TF-1-01	Terra_firme	2018	106	2018-06-30	2018-10-14	2018-08-07	08:12:39	MAMMAL	Frugivore.Granivore	Myoprocta	acouchy	Myoprocta_acouchy	1	undefined
TF-1-01	Terra_firme	2018	106	2018-06-30	2018-10-14	2018-08-30	04:25:03	MAMMAL	Frugivore.Omnivore	Didelphis	marsupialis	Didelphis_marsupialis	1	undefined
TF-1-01	Terra_firme	2018	106	2018-06-30	2018-10-14	2018-09-15	06:09:19	MAMMAL	Frugivore.Granivore	Myoprocta	acouchy	Myoprocta_acouchy	1	undefined
TF-1-01	Terra_firme	2018	106	2018-06-30	2018-10-14	2018-08-20	17:13:49	MAMMAL	Frugivore.Granivore	Myoprocta	acouchy	Myoprocta_acouchy	1	undefined
TF-1-01	Terra_firme	2018	106	2018-06-30	2018-10-14	2018-08-23	07:12:54	MAMMAL	Frugivore.Granivore	Myoprocta	acouchy	Myoprocta_acouchy	1	undefined
TF-1-01	Terra_firme	2018	106	2018-06-30	2018-10-14	2018-08-07	19:23:17	MAMMAL	Insectivore.Omnivore	Metachirus	nudicaudatus	Metachirus_nudicaudatus	1	undefined
TF-1-01	Terra_firme	2018	106	2018-06-30	2018-10-14	2018-08-07	21:22:31	MAMMAL	Frugivore.Granivore	Proechimys	spp.	Proechimys_spp.	1	undefined
TF-1-01	Terra_firme	2018	106	2018-06-30	2018-10-14	2018-10-04	00:02:35	MAMMAL	Frugivore.Herbivore	Cuniculus	paca	Cuniculus_paca	1	undefined
TF-1-01	Terra_firme	2018	106	2018-06-30	2018-10-14	2018-07-31	21:16:09	MAMMAL	Frugivore.Omnivore	Didelphis	marsupialis	Didelphis_marsupialis	1	undefined
TF-1-01	Terra_firme	2018	106	2018-06-30	2018-10-14	2018-07-31	22:15:08	MAMMAL	Insectivore.Omnivore	Metachirus	nudicaudatus	Metachirus_nudicaudatus	1	undefined
TF-1-01	Terra_firme	2018	106	2018-06-30	2018-10-14	2018-08-15	16:03:09	MAMMAL	Frugivore.Granivore	Myoprocta	acouchy	Myoprocta_acouchy	1	undefined
TF-1-01	Terra_firme	2018	106	2018-06-30	2018-10-14	2018-09-21	06:08:02	MAMMAL	Frugivore.Granivore	Myoprocta	acouchy	Myoprocta_acouchy	1	undefined
TF-1-01	Terra_firme	2018	106	2018-06-30	2018-10-14	2018-07-22	05:54:38	MAMMAL	Frugivore.Granivore	Myoprocta	acouchy	Myoprocta_acouchy	1	undefined
TF-1-01	Terra_firme	2018	106	2018-06-30	2018-10-14	2018-08-11	10:02:40	MAMMAL	Frugivore.Granivore	Dasyprocta	leporina	Dasyprocta_leporina	1	undefined
TF-1-01	Terra_firme	2018	106	2018-06-30	2018-10-14	2018-09-17	17:25:49	MAMMAL	Frugivore.Granivore	Myoprocta	acouchy	Myoprocta_acouchy	1	undefined
TF-1-01	Terra_firme	2018	106	2018-06-30	2018-10-14	2018-09-28	22:59:25	MAMMAL	Frugivore.Granivore	Proechimys	spp.	Proechimys_spp.	1	undefined
TF-1-01	Terra_firme	2018	106	2018-06-30	2018-10-14	2018-09-20	08:29:15	MAMMAL	Frugivore.Granivore	Myoprocta	acouchy	Myoprocta_acouchy	1	undefined
TF-1-01	Terra_firme	2018	106	2018-06-30	2018-10-14	2018-08-31	15:57:56	MAMMAL	Frugivore.Granivore	Myoprocta	acouchy	Myoprocta_acouchy	1	undefined
TF-1-01	Terra_firme	2018	106	2018-06-30	2018-10-14	2018-07-12	17:36:55	MAMMAL	Frugivore.Granivore	Myoprocta	acouchy	Myoprocta_acouchy	1	undefined
TF-1-01	Terra_firme	2018	106	2018-06-30	2018-10-14	2018-10-04	07:51:54	MAMMAL	Frugivore.Granivore	Myoprocta	acouchy	Myoprocta_acouchy	1	undefined
TF-1-01	Terra_firme	2018	106	2018-06-30	2018-10-14	2018-08-19	13:58:24	MAMMAL	Insectivore	Myrmecophaga	tridactyla	Myrmecophaga_tridactyla	1	undefined
TF-1-01	Terra_firme	2018	106	2018-06-30	2018-10-14	2018-08-09	06:15:50	MAMMAL	Frugivore.Granivore	Myoprocta	acouchy	Myoprocta_acouchy	1	undefined
TF-1-01	Terra_firme	2018	106	2018-06-30	2018-10-14	2018-10-06	09:08:26	MAMMAL	Frugivore.Granivore	Myoprocta	acouchy	Myoprocta_acouchy	1	undefined
TF-1-01	Terra_firme	2018	106	2018-06-30	2018-10-14	2018-08-15	18:56:34	MAMMAL	Frugivore.Omnivore	Didelphis	marsupialis	Didelphis_marsupialis	1	undefined
TF-1-01	Terra_firme	2018	106	2018-06-30	2018-10-14	2018-07-05	06:12:35	MAMMAL	Frugivore.Granivore	Myoprocta	acouchy	Myoprocta_acouchy	1	undefined
TF-1-01	Terra_firme	2018	106	2018-06-30	2018-10-14	2018-08-15	18:00:58	MAMMAL	Frugivore.Granivore	Myoprocta	acouchy	Myoprocta_acouchy	1	undefined
TF-1-01	Terra_firme	2018	106	2018-06-30	2018-10-14	2018-09-30	10:52:57	MAMMAL	Frugivore.Granivore	Myoprocta	acouchy	Myoprocta_acouchy	1	undefined
TF-1-01	Terra_firme	2018	106	2018-06-30	2018-10-14	2018-07-18	03:45:52	MAMMAL	Frugivore.Herbivore	Cuniculus	paca	Cuniculus_paca	1	undefined
TF-1-01	Terra_firme	2018	106	2018-06-30	2018-10-14	2018-07-08	06:30:12	MAMMAL	Frugivore.Granivore	Myoprocta	acouchy	Myoprocta_acouchy	1	undefined
TF-1-01	Terra_firme	2018	106	2018-06-30	2018-10-14	2018-07-23	18:11:52	MAMMAL	Frugivore.Granivore	Myoprocta	acouchy	Myoprocta_acouchy	1	undefined
TF-1-01	Terra_firme	2018	106	2018-06-30	2018-10-14	2018-09-01	20:53:12	MAMMAL	Insectivore.Omnivore	Metachirus	nudicaudatus	Metachirus_nudicaudatus	1	undefined
TF-1-01	Terra_firme	2018	106	2018-06-30	2018-10-14	2018-09-01	17:35:06	MAMMAL	Frugivore.Granivore	Myoprocta	acouchy	Myoprocta_acouchy	1	undefined
TF-1-01	Terra_firme	2018	106	2018-06-30	2018-10-14	2018-07-19	09:40:04	MAMMAL	Frugivore.Granivore	Myoprocta	acouchy	Myoprocta_acouchy	1	undefined
TF-1-01	Terra_firme	2018	106	2018-06-30	2018-10-14	2018-08-30	04:48:00	MAMMAL	Frugivore.Omnivore	Didelphis	marsupialis	Didelphis_marsupialis	1	undefined
TF-1-01	Terra_firme	2018	106	2018-06-30	2018-10-14	2018-09-12	23:18:49	MAMMAL	Insectivore.Omnivore	Metachirus	nudicaudatus	Metachirus_nudicaudatus	1	undefined
TF-1-01	Terra_firme	2018	106	2018-06-30	2018-10-14	2018-08-20	07:11:21	MAMMAL	Frugivore.Granivore	Myoprocta	acouchy	Myoprocta_acouchy	1	undefined
TF-1-01	Terra_firme	2018	106	2018-06-30	2018-10-14	2018-07-14	03:14:07	MAMMAL	Insectivore.Omnivore	Metachirus	nudicaudatus	Metachirus_nudicaudatus	1	undefined
TF-1-01	Terra_firme	2018	106	2018-06-30	2018-10-14	2018-08-07	17:07:30	MAMMAL	Frugivore.Granivore	Myoprocta	acouchy	Myoprocta_acouchy	1	undefined
TF-1-01	Terra_firme	2018	106	2018-06-30	2018-10-14	2018-07-08	05:43:50	MAMMAL	Frugivore.Granivore	Myoprocta	acouchy	Myoprocta_acouchy	1	undefined
TF-1-01	Terra_firme	2018	106	2018-06-30	2018-10-14	2018-10-01	18:08:20	MAMMAL	Frugivore.Granivore	Myoprocta	acouchy	Myoprocta_acouchy	1	undefined
TF-1-01	Terra_firme	2018	106	2018-06-30	2018-10-14	2018-07-15	17:39:20	MAMMAL	Frugivore.Granivore	Myoprocta	acouchy	Myoprocta_acouchy	1	undefined
TF-1-01	Terra_firme	2018	106	2018-06-30	2018-10-14	2018-08-04	06:15:52	MAMMAL	Frugivore.Granivore	Myoprocta	acouchy	Myoprocta_acouchy	1	undefined
TF-1-01	Terra_firme	2018	106	2018-06-30	2018-10-14	2018-07-15	22:01:57	MAMMAL	nodata	Oecomys	spp.	Oecomys_spp.	1	undefined
TF-2-01	Terra_firme	2019	62	2019-07-10	2019-09-10	2019-08-01	00:51:38	MAMMAL	Insectivore.Omnivore	Metachirus	nudicaudatus	Metachirus_nudicaudatus	1	undefined
TF-2-01	Terra_firme	2019	62	2019-07-10	2019-09-10	2019-07-31	00:55:23	MAMMAL	Frugivore.Herbivore	Cuniculus	paca	Cuniculus_paca	1	undefined
TF-2-01	Terra_firme	2019	62	2019-07-10	2019-09-10	2019-07-31	21:19:25	MAMMAL	Insectivore.Omnivore	Dasypus	spp.	Dasypus_spp.	1	undefined
TF-2-01	Terra_firme	2019	62	2019-07-10	2019-09-10	2019-07-31	04:04:05	MAMMAL	Insectivore.Omnivore	Metachirus	nudicaudatus	Metachirus_nudicaudatus	1	undefined
TF-2-01	Terra_firme	2019	62	2019-07-10	2019-09-10	2019-08-02	15:51:48	MAMMAL	Frugivore.Granivore	Dasyprocta	leporina	Dasyprocta_leporina	1	undefined
TF-2-01	Terra_firme	2019	62	2019-07-10	2019-09-10	2019-07-30	18:30:34	MAMMAL	Frugivore.Granivore	Myoprocta	acouchy	Myoprocta_acouchy	1	undefined
TF-2-01	Terra_firme	2019	62	2019-07-10	2019-09-10	2019-08-28	21:53:26	MAMMAL	Insectivore.Omnivore	Metachirus	nudicaudatus	Metachirus_nudicaudatus	1	undefined
TF-2-01	Terra_firme	2019	62	2019-07-10	2019-09-10	2019-08-03	17:55:01	MAMMAL	Frugivore.Granivore	Dasyprocta	leporina	Dasyprocta_leporina	1	undefined
TF-2-01	Terra_firme	2019	62	2019-07-10	2019-09-10	2019-07-29	17:35:52	MAMMAL	Frugivore.Granivore	Dasyprocta	leporina	Dasyprocta_leporina	1	undefined
TF-2-01	Terra_firme	2019	62	2019-07-10	2019-09-10	2019-09-02	05:02:17	MAMMAL	Insectivore.Omnivore	Metachirus	nudicaudatus	Metachirus_nudicaudatus	1	undefined
TF-2-01	Terra_firme	2019	62	2019-07-10	2019-09-10	2019-08-27	05:23:53	MAMMAL	Frugivore.Omnivore	Didelphis	marsupialis	Didelphis_marsupialis	1	undefined
TF-2-01	Terra_firme	2019	62	2019-07-10	2019-09-10	2019-08-04	07:23:05	MAMMAL	Frugivore.Granivore	Dasyprocta	leporina	Dasyprocta_leporina	1	undefined
TF-2-01	Terra_firme	2019	62	2019-07-10	2019-09-10	2019-07-28	00:00:32	MAMMAL	Insectivore.Omnivore	Dasypus	spp.	Dasypus_spp.	1	undefined
TF-2-01	Terra_firme	2019	62	2019-07-10	2019-09-10	2019-09-03	18:08:18	MAMMAL	Frugivore.Granivore	Myoprocta	acouchy	Myoprocta_acouchy	1	undefined
TF-2-01	Terra_firme	2019	62	2019-07-10	2019-09-10	2019-08-26	06:12:11	MAMMAL	Frugivore.Granivore	Myoprocta	acouchy	Myoprocta_acouchy	1	undefined
TF-2-01	Terra_firme	2019	62	2019-07-10	2019-09-10	2019-08-05	05:52:17	MAMMAL	Frugivore.Granivore	Myoprocta	acouchy	Myoprocta_acouchy	1	undefined
TF-2-01	Terra_firme	2019	62	2019-07-10	2019-09-10	2019-07-27	07:29:51	MAMMAL	Frugivore.Granivore	Dasyprocta	leporina	Dasyprocta_leporina	1	undefined
TF-2-01	Terra_firme	2019	62	2019-07-10	2019-09-10	2019-07-27	00:05:01	MAMMAL	Insectivore.Omnivore	Dasypus	spp.	Dasypus_spp.	1	undefined
TF-2-01	Terra_firme	2019	62	2019-07-10	2019-09-10	2019-07-27	18:17:34	MAMMAL	Frugivore.Granivore	Myoprocta	acouchy	Myoprocta_acouchy	1	undefined
TF-2-01	Terra_firme	2019	62	2019-07-10	2019-09-10	2019-08-06	01:42:10	MAMMAL	Insectivore.Omnivore	Metachirus	nudicaudatus	Metachirus_nudicaudatus	1	undefined
TF-2-01	Terra_firme	2019	62	2019-07-10	2019-09-10	2019-08-06	03:37:33	MAMMAL	Insectivore.Omnivore	Metachirus	nudicaudatus	Metachirus_nudicaudatus	1	undefined
TF-2-01	Terra_firme	2019	62	2019-07-10	2019-09-10	2019-07-26	08:35:54	MAMMAL	Frugivore.Granivore	Dasyprocta	leporina	Dasyprocta_leporina	1	undefined
TF-2-01	Terra_firme	2019	62	2019-07-10	2019-09-10	2019-07-26	04:06:30	MAMMAL	Frugivore.Omnivore	Didelphis	marsupialis	Didelphis_marsupialis	1	undefined
TF-2-01	Terra_firme	2019	62	2019-07-10	2019-09-10	2019-07-26	17:53:34	MAMMAL	Frugivore.Granivore	Myoprocta	acouchy	Myoprocta_acouchy	1	undefined
TF-2-01	Terra_firme	2019	62	2019-07-10	2019-09-10	2019-09-05	06:00:46	MAMMAL	Frugivore.Granivore	Myoprocta	acouchy	Myoprocta_acouchy	1	undefined
TF-2-01	Terra_firme	2019	62	2019-07-10	2019-09-10	2019-08-24	17:43:59	MAMMAL	Frugivore.Granivore	Myoprocta	acouchy	Myoprocta_acouchy	1	undefined
TF-2-01	Terra_firme	2019	62	2019-07-10	2019-09-10	2019-08-07	17:43:00	MAMMAL	Frugivore.Granivore	Dasyprocta	leporina	Dasyprocta_leporina	1	undefined
TF-2-01	Terra_firme	2019	62	2019-07-10	2019-09-10	2019-09-06	17:54:50	MAMMAL	Frugivore.Granivore	Myoprocta	acouchy	Myoprocta_acouchy	1	undefined
TF-2-01	Terra_firme	2019	62	2019-07-10	2019-09-10	2019-08-08	17:28:00	MAMMAL	Frugivore.Granivore	Dasyprocta	leporina	Dasyprocta_leporina	1	undefined
TF-2-01	Terra_firme	2019	62	2019-07-10	2019-09-10	2019-08-08	00:46:09	MAMMAL	Insectivore.Omnivore	Metachirus	nudicaudatus	Metachirus_nudicaudatus	1	undefined
TF-2-01	Terra_firme	2019	62	2019-07-10	2019-09-10	2019-08-08	01:48:43	MAMMAL	Insectivore.Omnivore	Metachirus	nudicaudatus	Metachirus_nudicaudatus	1	undefined
TF-2-01	Terra_firme	2019	62	2019-07-10	2019-09-10	2019-08-08	06:08:25	MAMMAL	Frugivore.Granivore	Myoprocta	acouchy	Myoprocta_acouchy	1	undefined
TF-2-01	Terra_firme	2019	62	2019-07-10	2019-09-10	2019-08-08	04:37:06	MAMMAL	Insectivore	Tamandua	tetradactyla	Tamandua_tetradactyla	1	undefined
TF-2-01	Terra_firme	2019	62	2019-07-10	2019-09-10	2019-07-24	04:52:07	MAMMAL	Frugivore.Omnivore	Didelphis	marsupialis	Didelphis_marsupialis	1	undefined
TF-2-01	Terra_firme	2019	62	2019-07-10	2019-09-10	2019-07-24	05:18:07	MAMMAL	Insectivore.Omnivore	Philander	opossum	Philander_opossum	1	undefined
TF-2-01	Terra_firme	2019	62	2019-07-10	2019-09-10	2019-09-07	05:43:32	MAMMAL	Frugivore.Granivore	Myoprocta	acouchy	Myoprocta_acouchy	1	undefined
TF-2-01	Terra_firme	2019	62	2019-07-10	2019-09-10	2019-07-10	10:27:25	INSTALL	Setup	Setup	Setup	Setup	1	undefined
TF-2-01	Terra_firme	2019	62	2019-07-10	2019-09-10	2019-08-22	07:13:09	MAMMAL	Frugivore.Granivore	Dasyprocta	leporina	Dasyprocta_leporina	1	undefined
TF-2-01	Terra_firme	2019	62	2019-07-10	2019-09-10	2019-08-22	21:26:25	MAMMAL	Insectivore.Omnivore	Metachirus	nudicaudatus	Metachirus_nudicaudatus	1	undefined
TF-2-01	Terra_firme	2019	62	2019-07-10	2019-09-10	2019-08-09	06:35:04	MAMMAL	Frugivore.Granivore	Dasyprocta	leporina	Dasyprocta_leporina	1	undefined
TF-2-01	Terra_firme	2019	62	2019-07-10	2019-09-10	2019-07-11	03:25:44	MAMMAL	Insectivore.Omnivore	Metachirus	nudicaudatus	Metachirus_nudicaudatus	1	undefined
TF-2-01	Terra_firme	2019	62	2019-07-10	2019-09-10	2019-08-10	04:54:30	MAMMAL	Frugivore.Herbivore	Cuniculus	paca	Cuniculus_paca	1	undefined
TF-2-01	Terra_firme	2019	62	2019-07-10	2019-09-10	2019-08-10	18:04:25	MAMMAL	Frugivore.Herbivore	Cuniculus	paca	Cuniculus_paca	1	undefined
TF-2-01	Terra_firme	2019	62	2019-07-10	2019-09-10	2019-07-12	17:57:38	MAMMAL	Frugivore.Granivore	Dasyprocta	leporina	Dasyprocta_leporina	1	undefined
TF-2-01	Terra_firme	2019	62	2019-07-10	2019-09-10	2019-08-20	06:27:27	MAMMAL	Frugivore.Granivore	Dasyprocta	leporina	Dasyprocta_leporina	1	undefined
TF-2-01	Terra_firme	2019	62	2019-07-10	2019-09-10	2019-08-20	18:38:20	MAMMAL	Carnivore	Leopardus	wiedii	Leopardus_wiedii	1	undefined
TF-2-01	Terra_firme	2019	62	2019-07-10	2019-09-10	2019-08-11	12:37:41	MAMMAL	Frugivore.Granivore	Dasyprocta	leporina	Dasyprocta_leporina	1	undefined
TF-2-01	Terra_firme	2019	62	2019-07-10	2019-09-10	2019-09-10	03:46:20	MAMMAL	Frugivore.Herbivore	Cuniculus	paca	Cuniculus_paca	1	undefined
TF-2-01	Terra_firme	2019	62	2019-07-10	2019-09-10	2019-09-10	09:13:19	INSTALL	Retrieval	Retrieval	Retrieval	Pickup	1	undefined
TF-2-01	Terra_firme	2019	62	2019-07-10	2019-09-10	2019-07-13	18:21:11	MAMMAL	Frugivore.Granivore	Myoprocta	acouchy	Myoprocta_acouchy	1	undefined
TF-2-01	Terra_firme	2019	62	2019-07-10	2019-09-10	2019-08-12	06:24:16	MAMMAL	Frugivore.Granivore	Myoprocta	acouchy	Myoprocta_acouchy	1	undefined
TF-2-01	Terra_firme	2019	62	2019-07-10	2019-09-10	2019-07-20	08:39:11	MAMMAL	Frugivore.Granivore	Dasyprocta	leporina	Dasyprocta_leporina	1	undefined
TF-2-01	Terra_firme	2019	62	2019-07-10	2019-09-10	2019-08-18	19:13:08	MAMMAL	Insectivore.Omnivore	Metachirus	nudicaudatus	Metachirus_nudicaudatus	1	undefined
TF-2-01	Terra_firme	2019	62	2019-07-10	2019-09-10	2019-08-13	18:18:53	MAMMAL	Frugivore.Granivore	Myoprocta	acouchy	Myoprocta_acouchy	2	undefined
TF-2-01	Terra_firme	2019	62	2019-07-10	2019-09-10	2019-07-15	17:00:47	MAMMAL	Frugivore.Granivore	Dasyprocta	leporina	Dasyprocta_leporina	1	undefined
TF-2-01	Terra_firme	2019	62	2019-07-10	2019-09-10	2019-08-14	06:06:10	MAMMAL	Frugivore.Granivore	Dasyprocta	leporina	Dasyprocta_leporina	1	undefined
TF-2-01	Terra_firme	2019	62	2019-07-10	2019-09-10	2019-08-14	16:58:04	MAMMAL	Frugivore.Herbivore	Mazama	nemorivaga	Mazama_nemorivaga	1	Female
TF-2-01	Terra_firme	2019	62	2019-07-10	2019-09-10	2019-08-15	18:07:05	MAMMAL	Frugivore.Granivore	Myoprocta	acouchy	Myoprocta_acouchy	1	undefined
TF-2-01	Terra_firme	2019	62	2019-07-10	2019-09-10	2019-08-15	15:47:33	MAMMAL	Carnivore	Panthera	onca	Panthera_onca	1	Female
TF-1-02	Terra_firme	2018	106	2018-06-30	2018-10-14	2018-08-27	10:22:06	MAMMAL	Frugivore.Granivore	Myoprocta	acouchy	Myoprocta_acouchy	1	undefined
TF-1-02	Terra_firme	2018	106	2018-06-30	2018-10-14	2018-06-30	23:22:44	MAMMAL	Frugivore.Omnivore	Didelphis	marsupialis	Didelphis_marsupialis	1	undefined
TF-1-02	Terra_firme	2018	106	2018-06-30	2018-10-14	2018-06-30	09:39:24	INSTALL	Setup	Setup	Setup	Setup	1	undefined
TF-1-02	Terra_firme	2018	106	2018-06-30	2018-10-14	2018-09-27	19:05:26	MAMMAL	Frugivore.Granivore	Proechimys	spp.	Proechimys_spp.	1	undefined
TF-1-02	Terra_firme	2018	106	2018-06-30	2018-10-14	2018-08-19	05:23:10	MAMMAL	nodata	Marmosa	spp.	Marmosa_spp.	1	undefined
TF-1-02	Terra_firme	2018	106	2018-06-30	2018-10-14	2018-08-19	01:28:54	MAMMAL	Insectivore.Omnivore	Metachirus	nudicaudatus	Metachirus_nudicaudatus	1	undefined
TF-1-02	Terra_firme	2018	106	2018-06-30	2018-10-14	2018-07-11	17:57:33	MAMMAL	Frugivore.Granivore	Myoprocta	acouchy	Myoprocta_acouchy	1	undefined
TF-1-02	Terra_firme	2018	106	2018-06-30	2018-10-14	2018-10-05	21:41:31	MAMMAL	Frugivore.Granivore	Proechimys	spp.	Proechimys_spp.	1	undefined
TF-1-02	Terra_firme	2018	106	2018-06-30	2018-10-14	2018-10-05	23:39:20	MAMMAL	Frugivore.Granivore	Proechimys	spp.	Proechimys_spp.	1	undefined
TF-1-02	Terra_firme	2018	106	2018-06-30	2018-10-14	2018-07-08	15:58:06	MAMMAL	nodata	Marmosa	spp.	Marmosa_spp.	1	undefined
TF-1-02	Terra_firme	2018	106	2018-06-30	2018-10-14	2018-07-08	04:32:55	MAMMAL	nodata	Oecomys	spp.	Oecomys_spp.	1	undefined
TF-1-02	Terra_firme	2018	106	2018-06-30	2018-10-14	2018-07-08	22:24:45	MAMMAL	Frugivore.Granivore	Proechimys	spp.	Proechimys_spp.	1	undefined
TF-1-02	Terra_firme	2018	106	2018-06-30	2018-10-14	2018-08-16	19:21:42	MAMMAL	Frugivore.Omnivore	Didelphis	marsupialis	Didelphis_marsupialis	1	undefined
TF-1-02	Terra_firme	2018	106	2018-06-30	2018-10-14	2018-09-08	22:07:07	MAMMAL	Insectivore.Omnivore	Metachirus	nudicaudatus	Metachirus_nudicaudatus	1	undefined
TF-1-02	Terra_firme	2018	106	2018-06-30	2018-10-14	2018-09-05	02:22:39	MAMMAL	Insectivore.Omnivore	Metachirus	nudicaudatus	Metachirus_nudicaudatus	1	undefined
TF-1-02	Terra_firme	2018	106	2018-06-30	2018-10-14	2018-09-05	04:16:31	MAMMAL	Frugivore.Granivore	Proechimys	spp.	Proechimys_spp.	1	undefined
TF-1-02	Terra_firme	2018	106	2018-06-30	2018-10-14	2018-07-27	14:01:28	MAMMAL	Frugivore.Granivore	Dasyprocta	leporina	Dasyprocta_leporina	1	undefined
TF-1-02	Terra_firme	2018	106	2018-06-30	2018-10-14	2018-07-27	04:52:11	MAMMAL	Insectivore.Omnivore	Metachirus	nudicaudatus	Metachirus_nudicaudatus	1	undefined
TF-1-02	Terra_firme	2018	106	2018-06-30	2018-10-14	2018-10-08	10:39:22	MAMMAL	Frugivore.Granivore	Myoprocta	acouchy	Myoprocta_acouchy	1	undefined
TF-1-02	Terra_firme	2018	106	2018-06-30	2018-10-14	2018-09-19	00:15:49	MAMMAL	Frugivore.Omnivore	Didelphis	marsupialis	Didelphis_marsupialis	1	undefined
TF-1-02	Terra_firme	2018	106	2018-06-30	2018-10-14	2018-09-19	00:09:41	MAMMAL	Insectivore.Omnivore	Metachirus	nudicaudatus	Metachirus_nudicaudatus	1	undefined
TF-1-02	Terra_firme	2018	106	2018-06-30	2018-10-14	2018-09-19	04:01:24	MAMMAL	Insectivore.Omnivore	Metachirus	nudicaudatus	Metachirus_nudicaudatus	1	undefined
TF-1-02	Terra_firme	2018	106	2018-06-30	2018-10-14	2018-08-11	06:11:17	MAMMAL	Frugivore.Granivore	Myoprocta	acouchy	Myoprocta_acouchy	1	undefined
TF-1-02	Terra_firme	2018	106	2018-06-30	2018-10-14	2018-07-03	01:44:15	MAMMAL	Insectivore.Omnivore	Metachirus	nudicaudatus	Metachirus_nudicaudatus	1	undefined
TF-1-02	Terra_firme	2018	106	2018-06-30	2018-10-14	2018-07-03	02:39:07	MAMMAL	nodata	Oecomys	spp.	Oecomys_spp.	1	undefined
TF-1-02	Terra_firme	2018	106	2018-06-30	2018-10-14	2018-08-30	09:49:41	MAMMAL	Frugivore.Granivore	Myoprocta	acouchy	Myoprocta_acouchy	1	undefined
TF-1-02	Terra_firme	2018	106	2018-06-30	2018-10-14	2018-10-13	01:53:26	MAMMAL	Insectivore.Omnivore	Metachirus	nudicaudatus	Metachirus_nudicaudatus	1	undefined
TF-1-02	Terra_firme	2018	106	2018-06-30	2018-10-14	2018-07-16	02:33:57	MAMMAL	Frugivore.Herbivore	Cuniculus	paca	Cuniculus_paca	1	undefined
TF-1-02	Terra_firme	2018	106	2018-06-30	2018-10-14	2018-07-22	01:39:56	MAMMAL	Frugivore.Omnivore	Didelphis	marsupialis	Didelphis_marsupialis	1	undefined
TF-1-02	Terra_firme	2018	106	2018-06-30	2018-10-14	2018-07-22	20:09:18	MAMMAL	nodata	Marmosa	spp.	Marmosa_spp.	1	undefined
TF-1-02	Terra_firme	2018	106	2018-06-30	2018-10-14	2018-08-24	07:22:48	MAMMAL	Frugivore.Granivore	Myoprocta	acouchy	Myoprocta_acouchy	1	undefined
TF-1-02	Terra_firme	2018	106	2018-06-30	2018-10-14	2018-08-05	20:17:19	MAMMAL	Frugivore.Herbivore	Cuniculus	paca	Cuniculus_paca	1	undefined
TF-1-02	Terra_firme	2018	106	2018-06-30	2018-10-14	2018-08-05	20:27:01	MAMMAL	Insectivore.Omnivore	Philander	opossum	Philander_opossum	1	undefined
TF-1-02	Terra_firme	2018	106	2018-06-30	2018-10-14	2018-09-13	02:44:56	MAMMAL	Frugivore.Herbivore	Cuniculus	paca	Cuniculus_paca	1	undefined
TF-1-02	Terra_firme	2018	106	2018-06-30	2018-10-14	2018-08-03	04:17:33	MAMMAL	Frugivore.Omnivore	Didelphis	marsupialis	Didelphis_marsupialis	1	undefined
TF-1-02	Terra_firme	2018	106	2018-06-30	2018-10-14	2018-08-03	18:58:03	MAMMAL	Insectivore.Omnivore	Metachirus	nudicaudatus	Metachirus_nudicaudatus	1	undefined
TF-1-02	Terra_firme	2018	106	2018-06-30	2018-10-14	2018-08-03	02:49:39	MAMMAL	Carnivore	Panthera	onca	Panthera_onca	1	undefined
TF-1-02	Terra_firme	2018	106	2018-06-30	2018-10-14	2018-08-03	04:21:37	MAMMAL	Insectivore.Omnivore	Philander	opossum	Philander_opossum	1	undefined
TF-1-02	Terra_firme	2018	106	2018-06-30	2018-10-14	2018-09-30	23:14:07	MAMMAL	Insectivore.Omnivore	Metachirus	nudicaudatus	Metachirus_nudicaudatus	1	undefined
TF-1-02	Terra_firme	2018	106	2018-06-30	2018-10-14	2018-07-24	02:25:18	MAMMAL	Frugivore.Omnivore	Didelphis	marsupialis	Didelphis_marsupialis	1	undefined
TF-1-02	Terra_firme	2018	106	2018-06-30	2018-10-14	2018-07-24	22:25:23	MAMMAL	nodata	Marmosa	spp.	Marmosa_spp.	1	undefined
TF-1-02	Terra_firme	2018	106	2018-06-30	2018-10-14	2018-07-14	01:12:05	MAMMAL	nodata	Marmosa	spp.	Marmosa_spp.	1	undefined
TF-1-02	Terra_firme	2018	106	2018-06-30	2018-10-14	2018-09-02	19:30:35	MAMMAL	nodata	Marmosa	spp.	Marmosa_spp.	1	undefined
TF-1-02	Terra_firme	2018	106	2018-06-30	2018-10-14	2018-09-03	04:10:10	MAMMAL	Frugivore.Granivore	Proechimys	spp.	Proechimys_spp.	1	undefined
TF-1-02	Terra_firme	2018	106	2018-06-30	2018-10-14	2018-07-06	22:04:56	MAMMAL	Insectivore.Omnivore	Metachirus	nudicaudatus	Metachirus_nudicaudatus	1	undefined
TF-1-02	Terra_firme	2018	106	2018-06-30	2018-10-14	2018-10-03	01:06:15	MAMMAL	Insectivore.Omnivore	Metachirus	nudicaudatus	Metachirus_nudicaudatus	1	undefined
TF-1-02	Terra_firme	2018	106	2018-06-30	2018-10-14	2018-10-03	19:11:35	MAMMAL	Frugivore.Granivore	Proechimys	spp.	Proechimys_spp.	1	undefined
TF-1-02	Terra_firme	2018	106	2018-06-30	2018-10-14	2018-07-13	01:56:49	MAMMAL	Frugivore.Omnivore	Didelphis	marsupialis	Didelphis_marsupialis	1	undefined
TF-1-02	Terra_firme	2018	106	2018-06-30	2018-10-14	2018-07-13	22:50:22	MAMMAL	nodata	Marmosa	spp.	Marmosa_spp.	1	undefined
TF-1-02	Terra_firme	2018	106	2018-06-30	2018-10-14	2018-07-13	05:22:37	MAMMAL	nodata	Oecomys	spp.	Oecomys_spp.	1	undefined
TF-1-02	Terra_firme	2018	106	2018-06-30	2018-10-14	2018-07-25	03:55:52	MAMMAL	Frugivore.Omnivore	Didelphis	marsupialis	Didelphis_marsupialis	1	undefined
TF-1-02	Terra_firme	2018	106	2018-06-30	2018-10-14	2018-08-21	04:04:10	MAMMAL	nodata	Marmosa	spp.	Marmosa_spp.	1	undefined
TF-1-02	Terra_firme	2018	106	2018-06-30	2018-10-14	2018-08-21	06:12:47	MAMMAL	Frugivore.Granivore	Myoprocta	acouchy	Myoprocta_acouchy	1	undefined
TF-1-02	Terra_firme	2018	106	2018-06-30	2018-10-14	2018-09-29	23:43:57	MAMMAL	Insectivore.Omnivore	Metachirus	nudicaudatus	Metachirus_nudicaudatus	1	undefined
TF-1-02	Terra_firme	2018	106	2018-06-30	2018-10-14	2018-09-10	06:42:39	MAMMAL	Frugivore.Herbivore	Tapirus	terrestris	Tapirus_terrestris	1	undefined
TF-1-02	Terra_firme	2018	106	2018-06-30	2018-10-14	2018-09-14	23:27:02	MAMMAL	nodata	Marmosa	spp.	Marmosa_spp.	1	undefined
TF-1-02	Terra_firme	2018	106	2018-06-30	2018-10-14	2018-08-25	18:37:55	MAMMAL	Frugivore.Granivore	Proechimys	spp.	Proechimys_spp.	1	undefined
TF-1-02	Terra_firme	2018	106	2018-06-30	2018-10-14	2018-07-21	18:08:29	MAMMAL	Frugivore.Granivore	Myoprocta	acouchy	Myoprocta_acouchy	1	undefined
TF-1-02	Terra_firme	2018	106	2018-06-30	2018-10-14	2018-07-21	04:04:14	MAMMAL	Frugivore.Granivore	Proechimys	spp.	Proechimys_spp.	1	undefined
TF-1-02	Terra_firme	2018	106	2018-06-30	2018-10-14	2018-10-14	01:21:32	MAMMAL	Frugivore.Granivore	Proechimys	spp.	Proechimys_spp.	1	undefined
TF-1-02	Terra_firme	2018	106	2018-06-30	2018-10-14	2018-10-14	10:01:44	INSTALL	Retrieval	Retrieval	Retrieval	Pickup	1	undefined
TF-1-02	Terra_firme	2018	106	2018-06-30	2018-10-14	2018-08-29	06:11:33	MAMMAL	Frugivore.Granivore	Myoprocta	acouchy	Myoprocta_acouchy	1	undefined
TF-1-02	Terra_firme	2018	106	2018-06-30	2018-10-14	2018-07-02	20:07:35	MAMMAL	nodata	Marmosa	spp.	Marmosa_spp.	1	undefined
TF-1-02	Terra_firme	2018	106	2018-06-30	2018-10-14	2018-07-02	18:56:11	MAMMAL	nodata	Oecomys	spp.	Oecomys_spp.	1	undefined
TF-1-02	Terra_firme	2018	106	2018-06-30	2018-10-14	2018-07-02	19:07:28	MAMMAL	nodata	Oecomys	spp.	Oecomys_spp.	1	undefined
TF-1-02	Terra_firme	2018	106	2018-06-30	2018-10-14	2018-08-10	02:48:29	MAMMAL	nodata	Marmosa	spp.	Marmosa_spp.	1	undefined
TF-1-02	Terra_firme	2018	106	2018-06-30	2018-10-14	2018-09-06	19:58:02	MAMMAL	Insectivore.Omnivore	Metachirus	nudicaudatus	Metachirus_nudicaudatus	1	undefined
TF-1-02	Terra_firme	2018	106	2018-06-30	2018-10-14	2018-08-17	03:18:53	MAMMAL	Insectivore.Omnivore	Metachirus	nudicaudatus	Metachirus_nudicaudatus	1	undefined
TF-1-02	Terra_firme	2018	106	2018-06-30	2018-10-14	2018-07-29	19:14:19	MAMMAL	Insectivore.Omnivore	Philander	opossum	Philander_opossum	1	undefined
TF-1-02	Terra_firme	2018	106	2018-06-30	2018-10-14	2018-07-09	19:37:16	MAMMAL	Frugivore.Omnivore	Didelphis	marsupialis	Didelphis_marsupialis	1	undefined
TF-1-02	Terra_firme	2018	106	2018-06-30	2018-10-14	2018-07-09	06:21:45	MAMMAL	Frugivore.Granivore	Myoprocta	acouchy	Myoprocta_acouchy	1	undefined
TF-1-02	Terra_firme	2018	106	2018-06-30	2018-10-14	2018-07-28	20:23:19	MAMMAL	Insectivore.Omnivore	Metachirus	nudicaudatus	Metachirus_nudicaudatus	1	undefined
TF-1-02	Terra_firme	2018	106	2018-06-30	2018-10-14	2018-08-18	04:28:08	MAMMAL	Insectivore.Omnivore	Metachirus	nudicaudatus	Metachirus_nudicaudatus	1	undefined
TF-1-02	Terra_firme	2018	106	2018-06-30	2018-10-14	2018-09-07	21:11:20	MAMMAL	Insectivore.Omnivore	Metachirus	nudicaudatus	Metachirus_nudicaudatus	1	undefined
TF-1-02	Terra_firme	2018	106	2018-06-30	2018-10-14	2018-09-17	01:27:38	MAMMAL	Insectivore.Omnivore	Metachirus	nudicaudatus	Metachirus_nudicaudatus	1	undefined
TF-1-02	Terra_firme	2018	106	2018-06-30	2018-10-14	2018-08-09	04:21:43	MAMMAL	Insectivore.Omnivore	Metachirus	nudicaudatus	Metachirus_nudicaudatus	1	undefined
TF-1-02	Terra_firme	2018	106	2018-06-30	2018-10-14	2018-07-01	21:48:27	MAMMAL	nodata	Marmosa	spp.	Marmosa_spp.	1	undefined
TF-1-02	Terra_firme	2018	106	2018-06-30	2018-10-14	2018-07-18	01:20:53	MAMMAL	nodata	Marmosa	spp.	Marmosa_spp.	1	undefined
TF-1-02	Terra_firme	2018	106	2018-06-30	2018-10-14	2018-07-20	02:01:23	MAMMAL	Frugivore.Omnivore	Didelphis	marsupialis	Didelphis_marsupialis	1	undefined
TF-1-02	Terra_firme	2018	106	2018-06-30	2018-10-14	2018-07-20	09:27:00	MAMMAL	Frugivore.Herbivore	Mazama	nemorivaga	Mazama_nemorivaga	2	Couple
TF-1-02	Terra_firme	2018	106	2018-06-30	2018-10-14	2018-07-20	05:58:01	MAMMAL	Frugivore.Granivore	Myoprocta	acouchy	Myoprocta_acouchy	1	undefined
TF-1-02	Terra_firme	2018	106	2018-06-30	2018-10-14	2018-08-26	12:23:34	MAMMAL	Frugivore.Granivore	Myoprocta	acouchy	Myoprocta_acouchy	1	undefined
TF-1-02	Terra_firme	2018	106	2018-06-30	2018-10-14	2018-08-26	16:15:56	MAMMAL	Frugivore.Granivore	Myoprocta	acouchy	Myoprocta_acouchy	1	undefined
TF-1-02	Terra_firme	2018	106	2018-06-30	2018-10-14	2018-08-26	17:49:06	MAMMAL	Frugivore.Granivore	Myoprocta	acouchy	Myoprocta_acouchy	1	undefined
TF-1-02	Terra_firme	2018	106	2018-06-30	2018-10-14	2018-08-26	02:45:53	MAMMAL	Frugivore.Granivore	Proechimys	spp.	Proechimys_spp.	1	undefined
TF-1-02	Terra_firme	2018	106	2018-06-30	2018-10-14	2018-08-07	03:43:45	MAMMAL	Insectivore.Omnivore	Metachirus	nudicaudatus	Metachirus_nudicaudatus	1	undefined
TF-1-02	Terra_firme	2018	106	2018-06-30	2018-10-14	2018-08-07	04:02:10	MAMMAL	Insectivore.Omnivore	Philander	opossum	Philander_opossum	1	undefined
TF-1-02	Terra_firme	2018	106	2018-06-30	2018-10-14	2018-10-04	00:43:37	MAMMAL	Frugivore.Granivore	Proechimys	spp.	Proechimys_spp.	1	undefined
TF-1-02	Terra_firme	2018	106	2018-06-30	2018-10-14	2018-07-31	00:38:08	MAMMAL	Frugivore.Granivore	Proechimys	spp.	Proechimys_spp.	1	undefined
TF-1-02	Terra_firme	2018	106	2018-06-30	2018-10-14	2018-09-04	02:18:59	MAMMAL	Insectivore.Omnivore	Metachirus	nudicaudatus	Metachirus_nudicaudatus	1	undefined
TF-1-02	Terra_firme	2018	106	2018-06-30	2018-10-14	2018-09-04	19:54:02	MAMMAL	Insectivore.Omnivore	Metachirus	nudicaudatus	Metachirus_nudicaudatus	1	undefined
TF-1-02	Terra_firme	2018	106	2018-06-30	2018-10-14	2018-08-20	04:32:05	MAMMAL	nodata	Marmosa	spp.	Marmosa_spp.	1	undefined
TF-1-02	Terra_firme	2018	106	2018-06-30	2018-10-14	2018-08-20	04:26:48	MAMMAL	Insectivore.Omnivore	Metachirus	nudicaudatus	Metachirus_nudicaudatus	1	undefined
TF-1-02	Terra_firme	2018	106	2018-06-30	2018-10-14	2018-08-20	23:13:20	MAMMAL	Frugivore.Granivore	Proechimys	spp.	Proechimys_spp.	1	undefined
TF-1-02	Terra_firme	2018	106	2018-06-30	2018-10-14	2018-07-12	00:23:30	MAMMAL	Frugivore.Omnivore	Didelphis	marsupialis	Didelphis_marsupialis	1	undefined
TF-1-02	Terra_firme	2018	106	2018-06-30	2018-10-14	2018-07-12	02:55:56	MAMMAL	nodata	Marmosa	spp.	Marmosa_spp.	1	undefined
TF-1-02	Terra_firme	2018	106	2018-06-30	2018-10-14	2018-07-07	02:20:26	MAMMAL	Insectivore.Omnivore	Metachirus	nudicaudatus	Metachirus_nudicaudatus	1	undefined
TF-1-02	Terra_firme	2018	106	2018-06-30	2018-10-14	2018-08-15	22:22:11	MAMMAL	nodata	Marmosa	spp.	Marmosa_spp.	1	undefined
TF-1-02	Terra_firme	2018	106	2018-06-30	2018-10-14	2018-08-15	23:08:24	MAMMAL	Insectivore.Omnivore	Philander	opossum	Philander_opossum	1	undefined
TF-1-02	Terra_firme	2018	106	2018-06-30	2018-10-14	2018-08-15	02:55:58	MAMMAL	Frugivore.Granivore	Proechimys	spp.	Proechimys_spp.	1	undefined
TF-1-02	Terra_firme	2018	106	2018-06-30	2018-10-14	2018-09-23	18:46:51	MAMMAL	Insectivore.Omnivore	Metachirus	nudicaudatus	Metachirus_nudicaudatus	1	undefined
TF-1-02	Terra_firme	2018	106	2018-06-30	2018-10-14	2018-10-12	05:38:03	MAMMAL	Frugivore.Granivore	Myoprocta	acouchy	Myoprocta_acouchy	1	undefined
TF-1-02	Terra_firme	2018	106	2018-06-30	2018-10-14	2018-08-04	20:58:18	MAMMAL	Frugivore.Granivore	Proechimys	spp.	Proechimys_spp.	1	undefined
TF-1-02	Terra_firme	2018	106	2018-06-30	2018-10-14	2018-08-12	08:27:13	MAMMAL	Frugivore.Granivore	Dasyprocta	leporina	Dasyprocta_leporina	1	undefined
TF-1-02	Terra_firme	2018	106	2018-06-30	2018-10-14	2018-08-12	18:15:20	MAMMAL	Frugivore.Granivore	Myoprocta	acouchy	Myoprocta_acouchy	1	undefined
TF-1-02	Terra_firme	2018	106	2018-06-30	2018-10-14	2018-07-04	19:39:45	MAMMAL	Insectivore.Omnivore	Metachirus	nudicaudatus	Metachirus_nudicaudatus	1	undefined
TF-1-02	Terra_firme	2018	106	2018-06-30	2018-10-14	2018-07-04	21:28:17	MAMMAL	Insectivore.Omnivore	Metachirus	nudicaudatus	Metachirus_nudicaudatus	1	undefined
TF-1-02	Terra_firme	2018	106	2018-06-30	2018-10-14	2018-07-04	06:14:02	MAMMAL	Frugivore.Granivore	Myoprocta	acouchy	Myoprocta_acouchy	1	undefined
TF-1-02	Terra_firme	2018	106	2018-06-30	2018-10-14	2018-10-01	23:19:14	MAMMAL	Insectivore.Omnivore	Metachirus	nudicaudatus	Metachirus_nudicaudatus	1	undefined
TF-1-02	Terra_firme	2018	106	2018-06-30	2018-10-14	2018-10-01	06:58:20	MAMMAL	Frugivore.Granivore	Myoprocta	acouchy	Myoprocta_acouchy	1	undefined
TF-1-02	Terra_firme	2018	106	2018-06-30	2018-10-14	2018-07-15	01:27:30	MAMMAL	Frugivore.Omnivore	Didelphis	marsupialis	Didelphis_marsupialis	1	undefined
TF-1-02	Terra_firme	2018	106	2018-06-30	2018-10-14	2018-08-23	08:18:39	MAMMAL	Frugivore.Granivore	Myoprocta	acouchy	Myoprocta_acouchy	1	undefined
TF-2-02	Terra_firme	2019	62	2019-07-10	2019-09-10	2019-07-31	03:33:24	MAMMAL	Insectivore.Omnivore	Metachirus	nudicaudatus	Metachirus_nudicaudatus	1	undefined
TF-2-02	Terra_firme	2019	62	2019-07-10	2019-09-10	2019-07-30	23:44:11	MAMMAL	Insectivore.Omnivore	Metachirus	nudicaudatus	Metachirus_nudicaudatus	1	undefined
TF-2-02	Terra_firme	2019	62	2019-07-10	2019-09-10	2019-09-02	02:05:49	MAMMAL	Frugivore.Herbivore	Cuniculus	paca	Cuniculus_paca	1	undefined
TF-2-02	Terra_firme	2019	62	2019-07-10	2019-09-10	2019-09-03	05:42:22	MAMMAL	Insectivore.Omnivore	Philander	opossum	Philander_opossum	1	undefined
TF-2-02	Terra_firme	2019	62	2019-07-10	2019-09-10	2019-08-26	23:56:15	MAMMAL	Insectivore.Omnivore	Dasypus	spp.	Dasypus_spp.	1	undefined
TF-2-02	Terra_firme	2019	62	2019-07-10	2019-09-10	2019-08-26	05:46:09	MAMMAL	Frugivore.Granivore	Myoprocta	acouchy	Myoprocta_acouchy	1	undefined
TF-2-02	Terra_firme	2019	62	2019-07-10	2019-09-10	2019-08-05	00:38:16	MAMMAL	Insectivore.Omnivore	Metachirus	nudicaudatus	Metachirus_nudicaudatus	1	undefined
TF-2-02	Terra_firme	2019	62	2019-07-10	2019-09-10	2019-08-05	04:28:26	MAMMAL	Insectivore.Omnivore	Metachirus	nudicaudatus	Metachirus_nudicaudatus	1	undefined
TF-2-02	Terra_firme	2019	62	2019-07-10	2019-09-10	2019-08-25	01:02:48	MAMMAL	Insectivore.Omnivore	Metachirus	nudicaudatus	Metachirus_nudicaudatus	1	undefined
TF-2-02	Terra_firme	2019	62	2019-07-10	2019-09-10	2019-08-25	21:33:12	MAMMAL	Insectivore.Omnivore	Metachirus	nudicaudatus	Metachirus_nudicaudatus	1	undefined
TF-2-02	Terra_firme	2019	62	2019-07-10	2019-09-10	2019-08-25	12:56:05	MAMMAL	Frugivore.Granivore	Myoprocta	acouchy	Myoprocta_acouchy	1	undefined
TF-2-02	Terra_firme	2019	62	2019-07-10	2019-09-10	2019-07-26	23:41:39	MAMMAL	Insectivore.Omnivore	Dasypus	spp.	Dasypus_spp.	1	undefined
TF-2-02	Terra_firme	2019	62	2019-07-10	2019-09-10	2019-07-26	00:06:08	MAMMAL	Insectivore.Omnivore	Metachirus	nudicaudatus	Metachirus_nudicaudatus	1	undefined
TF-2-02	Terra_firme	2019	62	2019-07-10	2019-09-10	2019-07-26	18:02:50	MAMMAL	Frugivore.Granivore	Myoprocta	acouchy	Myoprocta_acouchy	1	undefined
TF-2-02	Terra_firme	2019	62	2019-07-10	2019-09-10	2019-09-05	00:18:11	MAMMAL	Frugivore.Omnivore	Didelphis	marsupialis	Didelphis_marsupialis	1	undefined
TF-2-02	Terra_firme	2019	62	2019-07-10	2019-09-10	2019-09-05	05:52:50	MAMMAL	Frugivore.Granivore	Myoprocta	acouchy	Myoprocta_acouchy	1	undefined
TF-2-02	Terra_firme	2019	62	2019-07-10	2019-09-10	2019-07-25	21:00:53	MAMMAL	Frugivore.Herbivore	Cuniculus	paca	Cuniculus_paca	1	undefined
TF-2-02	Terra_firme	2019	62	2019-07-10	2019-09-10	2019-07-25	23:16:04	MAMMAL	Insectivore.Omnivore	Dasypus	spp.	Dasypus_spp.	1	undefined
TF-2-02	Terra_firme	2019	62	2019-07-10	2019-09-10	2019-08-23	21:21:23	MAMMAL	Frugivore.Granivore	Proechimys	spp.	Proechimys_spp.	1	undefined
TF-2-02	Terra_firme	2019	62	2019-07-10	2019-09-10	2019-07-24	23:58:38	MAMMAL	Frugivore.Herbivore	Cuniculus	paca	Cuniculus_paca	1	undefined
TF-2-02	Terra_firme	2019	62	2019-07-10	2019-09-10	2019-07-24	19:05:08	MAMMAL	Insectivore.Omnivore	Metachirus	nudicaudatus	Metachirus_nudicaudatus	1	undefined
TF-2-02	Terra_firme	2019	62	2019-07-10	2019-09-10	2019-09-07	23:51:30	MAMMAL	Frugivore.Herbivore	Cuniculus	paca	Cuniculus_paca	1	undefined
TF-2-02	Terra_firme	2019	62	2019-07-10	2019-09-10	2019-07-10	14:48:30	INSTALL	Setup	Setup	Setup	Setup	1	undefined
TF-2-02	Terra_firme	2019	62	2019-07-10	2019-09-10	2019-08-22	13:58:37	MAMMAL	Frugivore.Granivore	Dasyprocta	leporina	Dasyprocta_leporina	1	undefined
TF-2-02	Terra_firme	2019	62	2019-07-10	2019-09-10	2019-08-09	00:33:59	MAMMAL	Frugivore.Herbivore	Cuniculus	paca	Cuniculus_paca	1	undefined
TF-2-02	Terra_firme	2019	62	2019-07-10	2019-09-10	2019-09-08	01:16:18	MAMMAL	Frugivore.Herbivore	Cuniculus	paca	Cuniculus_paca	2	undefined
TF-2-02	Terra_firme	2019	62	2019-07-10	2019-09-10	2019-09-08	02:48:41	MAMMAL	Frugivore.Herbivore	Cuniculus	paca	Cuniculus_paca	2	undefined
TF-2-02	Terra_firme	2019	62	2019-07-10	2019-09-10	2019-09-09	01:55:16	MAMMAL	Frugivore.Herbivore	Cuniculus	paca	Cuniculus_paca	1	undefined
TF-2-02	Terra_firme	2019	62	2019-07-10	2019-09-10	2019-07-12	04:21:23	MAMMAL	Insectivore.Omnivore	Dasypus	spp.	Dasypus_spp.	1	undefined
TF-2-02	Terra_firme	2019	62	2019-07-10	2019-09-10	2019-07-12	04:31:10	MAMMAL	Insectivore.Omnivore	Metachirus	nudicaudatus	Metachirus_nudicaudatus	1	undefined
TF-2-02	Terra_firme	2019	62	2019-07-10	2019-09-10	2019-07-21	01:47:46	MAMMAL	Insectivore.Omnivore	Metachirus	nudicaudatus	Metachirus_nudicaudatus	1	undefined
TF-2-02	Terra_firme	2019	62	2019-07-10	2019-09-10	2019-07-21	19:05:45	MAMMAL	Insectivore.Omnivore	Metachirus	nudicaudatus	Metachirus_nudicaudatus	1	undefined
TF-2-02	Terra_firme	2019	62	2019-07-10	2019-09-10	2019-07-21	06:17:16	MAMMAL	Frugivore.Granivore	Myoprocta	acouchy	Myoprocta_acouchy	1	undefined
TF-2-02	Terra_firme	2019	62	2019-07-10	2019-09-10	2019-09-10	06:25:58	MAMMAL	Frugivore.Granivore	Myoprocta	acouchy	Myoprocta_acouchy	1	undefined
TF-2-02	Terra_firme	2019	62	2019-07-10	2019-09-10	2019-09-10	12:07:22	INSTALL	Retrieval	Retrieval	Retrieval	Pickup	1	undefined
TF-2-02	Terra_firme	2019	62	2019-07-10	2019-09-10	2019-07-13	03:00:01	MAMMAL	Insectivore.Omnivore	Metachirus	nudicaudatus	Metachirus_nudicaudatus	1	undefined
TF-2-02	Terra_firme	2019	62	2019-07-10	2019-09-10	2019-08-18	05:04:12	MAMMAL	Insectivore.Omnivore	Metachirus	nudicaudatus	Metachirus_nudicaudatus	1	undefined
TF-2-02	Terra_firme	2019	62	2019-07-10	2019-09-10	2019-07-19	05:51:48	MAMMAL	Frugivore.Granivore	Myoprocta	acouchy	Myoprocta_acouchy	1	undefined
TF-2-02	Terra_firme	2019	62	2019-07-10	2019-09-10	2019-07-15	03:17:49	MAMMAL	Insectivore.Omnivore	Metachirus	nudicaudatus	Metachirus_nudicaudatus	1	undefined
TF-2-02	Terra_firme	2019	62	2019-07-10	2019-09-10	2019-07-15	22:33:51	MAMMAL	Insectivore.Omnivore	Metachirus	nudicaudatus	Metachirus_nudicaudatus	1	undefined
TF-2-02	Terra_firme	2019	62	2019-07-10	2019-09-10	2019-07-15	06:28:19	MAMMAL	Frugivore.Granivore	Myoprocta	acouchy	Myoprocta_acouchy	1	undefined
TF-2-02	Terra_firme	2019	62	2019-07-10	2019-09-10	2019-08-17	00:13:41	MAMMAL	Frugivore.Omnivore	Didelphis	marsupialis	Didelphis_marsupialis	1	undefined
TF-2-02	Terra_firme	2019	62	2019-07-10	2019-09-10	2019-08-14	20:15:24	MAMMAL	Frugivore.Omnivore	Didelphis	marsupialis	Didelphis_marsupialis	1	undefined
TF-2-02	Terra_firme	2019	62	2019-07-10	2019-09-10	2019-08-14	17:04:37	MAMMAL	Frugivore.Omnivore	Nasua	nasua	Nasua_nasua	5	undefined
TF-2-02	Terra_firme	2019	62	2019-07-10	2019-09-10	2019-07-16	02:40:18	MAMMAL	Frugivore.Herbivore	Cuniculus	paca	Cuniculus_paca	1	undefined
TF-2-02	Terra_firme	2019	62	2019-07-10	2019-09-10	2019-08-16	18:08:37	MAMMAL	Frugivore.Granivore	Myoprocta	acouchy	Myoprocta_acouchy	1	undefined
TF-1-03	Terra_firme	2018	106	2018-06-30	2018-10-14	2018-07-19	03:53:16	MAMMAL	Insectivore.Omnivore	Dasypus	spp.	Dasypus_spp.	1	undefined
TF-1-03	Terra_firme	2018	106	2018-06-30	2018-10-14	2018-06-30	13:02:01	INSTALL	Setup	Setup	Setup	Setup	1	undefined
TF-1-03	Terra_firme	2018	106	2018-06-30	2018-10-14	2018-09-27	06:52:43	MAMMAL	Frugivore.Omnivore	Eira	barbara	Eira_barbara	1	undefined
TF-1-03	Terra_firme	2018	106	2018-06-30	2018-10-14	2018-08-19	17:55:33	MAMMAL	Frugivore.Granivore	Myoprocta	acouchy	Myoprocta_acouchy	1	undefined
TF-1-03	Terra_firme	2018	106	2018-06-30	2018-10-14	2018-07-11	04:55:02	MAMMAL	Frugivore.Granivore	Proechimys	spp.	Proechimys_spp.	1	undefined
TF-1-03	Terra_firme	2018	106	2018-06-30	2018-10-14	2018-10-05	01:32:15	MAMMAL	Insectivore.Omnivore	Metachirus	nudicaudatus	Metachirus_nudicaudatus	1	undefined
TF-1-03	Terra_firme	2018	106	2018-06-30	2018-10-14	2018-07-30	22:15:09	MAMMAL	Insectivore.Omnivore	Metachirus	nudicaudatus	Metachirus_nudicaudatus	1	undefined
TF-1-03	Terra_firme	2018	106	2018-06-30	2018-10-14	2018-07-30	18:05:09	MAMMAL	Frugivore.Granivore	Myoprocta	acouchy	Myoprocta_acouchy	1	undefined
TF-1-03	Terra_firme	2018	106	2018-06-30	2018-10-14	2018-09-24	04:16:39	MAMMAL	Frugivore.Granivore	Proechimys	spp.	Proechimys_spp.	1	undefined
TF-1-03	Terra_firme	2018	106	2018-06-30	2018-10-14	2018-09-05	07:44:52	MAMMAL	Frugivore.Granivore	Myoprocta	acouchy	Myoprocta_acouchy	1	undefined
TF-1-03	Terra_firme	2018	106	2018-06-30	2018-10-14	2018-10-08	16:31:06	MAMMAL	Frugivore.Omnivore	Eira	barbara	Eira_barbara	1	undefined
TF-1-03	Terra_firme	2018	106	2018-06-30	2018-10-14	2018-08-30	19:14:47	MAMMAL	Frugivore.Herbivore	Cuniculus	paca	Cuniculus_paca	1	undefined
TF-1-03	Terra_firme	2018	106	2018-06-30	2018-10-14	2018-10-13	01:42:34	MAMMAL	Insectivore.Omnivore	Metachirus	nudicaudatus	Metachirus_nudicaudatus	1	undefined
TF-1-03	Terra_firme	2018	106	2018-06-30	2018-10-14	2018-10-13	17:45:22	MAMMAL	Frugivore.Granivore	Myoprocta	acouchy	Myoprocta_acouchy	1	undefined
TF-1-03	Terra_firme	2018	106	2018-06-30	2018-10-14	2018-07-16	01:38:04	MAMMAL	Frugivore.Herbivore	Cuniculus	paca	Cuniculus_paca	1	undefined
TF-1-03	Terra_firme	2018	106	2018-06-30	2018-10-14	2018-07-16	01:08:23	MAMMAL	Insectivore.Omnivore	Philander	opossum	Philander_opossum	1	undefined
TF-1-03	Terra_firme	2018	106	2018-06-30	2018-10-14	2018-07-22	07:28:02	MAMMAL	Frugivore.Granivore	Myoprocta	acouchy	Myoprocta_acouchy	1	undefined
TF-1-03	Terra_firme	2018	106	2018-06-30	2018-10-14	2018-08-24	11:25:19	MAMMAL	Frugivore.Omnivore	Nasua	nasua	Nasua_nasua	4	undefined
TF-1-03	Terra_firme	2018	106	2018-06-30	2018-10-14	2018-09-11	14:21:09	MAMMAL	Frugivore.Granivore	Dasyprocta	leporina	Dasyprocta_leporina	1	undefined
TF-1-03	Terra_firme	2018	106	2018-06-30	2018-10-14	2018-09-11	17:32:38	MAMMAL	Frugivore.Granivore	Myoprocta	acouchy	Myoprocta_acouchy	1	undefined
TF-1-03	Terra_firme	2018	106	2018-06-30	2018-10-14	2018-08-03	01:11:51	MAMMAL	Frugivore.Herbivore	Cuniculus	paca	Cuniculus_paca	1	undefined
TF-1-03	Terra_firme	2018	106	2018-06-30	2018-10-14	2018-08-03	18:19:50	MAMMAL	Frugivore.Granivore	Proechimys	spp.	Proechimys_spp.	1	undefined
TF-1-03	Terra_firme	2018	106	2018-06-30	2018-10-14	2018-09-30	13:32:11	MAMMAL	Frugivore.Granivore	Dasyprocta	leporina	Dasyprocta_leporina	1	undefined
TF-1-03	Terra_firme	2018	106	2018-06-30	2018-10-14	2018-09-30	06:43:11	MAMMAL	Frugivore.Omnivore	Eira	barbara	Eira_barbara	1	undefined
TF-1-03	Terra_firme	2018	106	2018-06-30	2018-10-14	2018-09-30	19:40:37	MAMMAL	Insectivore.Omnivore	Metachirus	nudicaudatus	Metachirus_nudicaudatus	1	undefined
TF-1-03	Terra_firme	2018	106	2018-06-30	2018-10-14	2018-07-14	00:36:21	MAMMAL	Frugivore.Granivore	Proechimys	spp.	Proechimys_spp.	1	undefined
TF-1-03	Terra_firme	2018	106	2018-06-30	2018-10-14	2018-07-05	08:40:40	MAMMAL	Frugivore.Granivore	Dasyprocta	leporina	Dasyprocta_leporina	1	undefined
TF-1-03	Terra_firme	2018	106	2018-06-30	2018-10-14	2018-07-05	00:13:03	MAMMAL	Insectivore.Omnivore	Metachirus	nudicaudatus	Metachirus_nudicaudatus	1	undefined
TF-1-03	Terra_firme	2018	106	2018-06-30	2018-10-14	2018-09-03	01:56:28	MAMMAL	Insectivore.Omnivore	Metachirus	nudicaudatus	Metachirus_nudicaudatus	1	undefined
TF-1-03	Terra_firme	2018	106	2018-06-30	2018-10-14	2018-07-06	18:00:49	MAMMAL	Frugivore.Granivore	Myoprocta	acouchy	Myoprocta_acouchy	1	undefined
TF-1-03	Terra_firme	2018	106	2018-06-30	2018-10-14	2018-10-03	19:28:54	MAMMAL	Insectivore.Omnivore	Metachirus	nudicaudatus	Metachirus_nudicaudatus	1	undefined
TF-1-03	Terra_firme	2018	106	2018-06-30	2018-10-14	2018-09-14	00:35:19	MAMMAL	Frugivore.Herbivore	Cuniculus	paca	Cuniculus_paca	1	undefined
TF-1-03	Terra_firme	2018	106	2018-06-30	2018-10-14	2018-09-14	06:15:42	MAMMAL	Frugivore.Granivore	Myoprocta	acouchy	Myoprocta_acouchy	1	undefined
TF-1-03	Terra_firme	2018	106	2018-06-30	2018-10-14	2018-08-06	01:34:09	MAMMAL	Insectivore.Omnivore	Metachirus	nudicaudatus	Metachirus_nudicaudatus	1	undefined
TF-1-03	Terra_firme	2018	106	2018-06-30	2018-10-14	2018-08-06	23:55:34	MAMMAL	Insectivore.Omnivore	Metachirus	nudicaudatus	Metachirus_nudicaudatus	1	undefined
TF-1-03	Terra_firme	2018	106	2018-06-30	2018-10-14	2018-08-25	04:56:51	MAMMAL	Insectivore.Omnivore	Metachirus	nudicaudatus	Metachirus_nudicaudatus	1	undefined
TF-1-03	Terra_firme	2018	106	2018-06-30	2018-10-14	2018-10-14	10:38:57	INSTALL	Retrieval	Retrieval	Retrieval	Pickup	1	undefined
TF-1-03	Terra_firme	2018	106	2018-06-30	2018-10-14	2018-09-25	05:33:58	MAMMAL	Frugivore.Granivore	Myoprocta	acouchy	Myoprocta_acouchy	1	undefined
TF-1-03	Terra_firme	2018	106	2018-06-30	2018-10-14	2018-09-25	17:50:40	MAMMAL	Frugivore.Granivore	Myoprocta	acouchy	Myoprocta_acouchy	1	undefined
TF-1-03	Terra_firme	2018	106	2018-06-30	2018-10-14	2018-08-17	19:02:42	MAMMAL	Carnivore	Panthera	onca	Panthera_onca	1	undefined
TF-1-03	Terra_firme	2018	106	2018-06-30	2018-10-14	2018-10-06	18:42:11	MAMMAL	Insectivore.Omnivore	Metachirus	nudicaudatus	Metachirus_nudicaudatus	1	undefined
TF-1-03	Terra_firme	2018	106	2018-06-30	2018-10-14	2018-10-06	19:35:18	MAMMAL	Frugivore.Granivore	Proechimys	spp.	Proechimys_spp.	1	undefined
TF-1-03	Terra_firme	2018	106	2018-06-30	2018-10-14	2018-07-10	07:52:05	MAMMAL	Frugivore.Granivore	Myoprocta	acouchy	Myoprocta_acouchy	1	undefined
TF-1-03	Terra_firme	2018	106	2018-06-30	2018-10-14	2018-07-10	19:19:16	MAMMAL	Frugivore.Granivore	Proechimys	spp.	Proechimys_spp.	1	undefined
TF-1-03	Terra_firme	2018	106	2018-06-30	2018-10-14	2018-07-10	21:29:07	MAMMAL	Frugivore.Granivore	Proechimys	spp.	Proechimys_spp.	1	undefined
TF-1-03	Terra_firme	2018	106	2018-06-30	2018-10-14	2018-07-28	09:49:49	MAMMAL	Frugivore.Granivore	Myoprocta	acouchy	Myoprocta_acouchy	1	undefined
TF-1-03	Terra_firme	2018	106	2018-06-30	2018-10-14	2018-07-28	18:00:58	MAMMAL	Frugivore.Granivore	Myoprocta	acouchy	Myoprocta_acouchy	1	undefined
TF-1-03	Terra_firme	2018	106	2018-06-30	2018-10-14	2018-09-07	04:45:52	MAMMAL	Insectivore.Omnivore	Metachirus	nudicaudatus	Metachirus_nudicaudatus	1	undefined
TF-1-03	Terra_firme	2018	106	2018-06-30	2018-10-14	2018-08-09	23:38:27	MAMMAL	Frugivore.Omnivore	Didelphis	marsupialis	Didelphis_marsupialis	1	undefined
TF-1-03	Terra_firme	2018	106	2018-06-30	2018-10-14	2018-07-01	02:10:55	MAMMAL	Frugivore.Granivore	Proechimys	spp.	Proechimys_spp.	1	undefined
TF-1-03	Terra_firme	2018	106	2018-06-30	2018-10-14	2018-07-20	11:29:21	MAMMAL	Frugivore.Granivore	Dasyprocta	leporina	Dasyprocta_leporina	1	undefined
TF-1-03	Terra_firme	2018	106	2018-06-30	2018-10-14	2018-08-07	01:55:26	MAMMAL	Insectivore.Omnivore	Dasypus	spp.	Dasypus_spp.	1	undefined
TF-1-03	Terra_firme	2018	106	2018-06-30	2018-10-14	2018-10-04	22:10:29	MAMMAL	Insectivore.Omnivore	Metachirus	nudicaudatus	Metachirus_nudicaudatus	1	undefined
TF-1-03	Terra_firme	2018	106	2018-06-30	2018-10-14	2018-10-04	05:22:23	MAMMAL	Frugivore.Granivore	Myoprocta	acouchy	Myoprocta_acouchy	1	undefined
TF-1-03	Terra_firme	2018	106	2018-06-30	2018-10-14	2018-07-31	07:54:23	MAMMAL	Frugivore.Granivore	Myoprocta	acouchy	Myoprocta_acouchy	1	undefined
TF-1-03	Terra_firme	2018	106	2018-06-30	2018-10-14	2018-07-31	17:53:35	MAMMAL	Frugivore.Granivore	Myoprocta	acouchy	Myoprocta_acouchy	1	undefined
TF-1-03	Terra_firme	2018	106	2018-06-30	2018-10-14	2018-09-09	07:06:06	MAMMAL	Frugivore.Granivore	Myoprocta	acouchy	Myoprocta_acouchy	1	undefined
TF-1-03	Terra_firme	2018	106	2018-06-30	2018-10-14	2018-08-01	17:22:39	MAMMAL	Frugivore.Granivore	Dasyprocta	leporina	Dasyprocta_leporina	1	undefined
TF-1-03	Terra_firme	2018	106	2018-06-30	2018-10-14	2018-09-28	06:38:16	MAMMAL	Frugivore.Granivore	Dasyprocta	leporina	Dasyprocta_leporina	1	undefined
TF-1-03	Terra_firme	2018	106	2018-06-30	2018-10-14	2018-09-28	18:43:29	MAMMAL	Insectivore.Omnivore	Metachirus	nudicaudatus	Metachirus_nudicaudatus	1	undefined
TF-1-03	Terra_firme	2018	106	2018-06-30	2018-10-14	2018-08-20	22:48:41	MAMMAL	Frugivore.Granivore	Proechimys	spp.	Proechimys_spp.	1	undefined
TF-1-03	Terra_firme	2018	106	2018-06-30	2018-10-14	2018-08-31	11:09:00	MAMMAL	Frugivore.Herbivore	Mazama	nemorivaga	Mazama_nemorivaga	2	Couple
TF-1-03	Terra_firme	2018	106	2018-06-30	2018-10-14	2018-08-31	16:50:00	MAMMAL	Frugivore.Granivore	Myoprocta	acouchy	Myoprocta_acouchy	1	undefined
TF-1-03	Terra_firme	2018	106	2018-06-30	2018-10-14	2018-07-23	01:01:16	MAMMAL	Frugivore.Herbivore	Cuniculus	paca	Cuniculus_paca	1	undefined
TF-1-03	Terra_firme	2018	106	2018-06-30	2018-10-14	2018-08-04	23:05:44	MAMMAL	nodata	Marmosa	spp.	Marmosa_spp.	1	undefined
TF-1-03	Terra_firme	2018	106	2018-06-30	2018-10-14	2018-08-12	11:42:20	MAMMAL	Frugivore.Granivore	Dasyprocta	leporina	Dasyprocta_leporina	1	undefined
TF-1-03	Terra_firme	2018	106	2018-06-30	2018-10-14	2018-08-12	09:09:49	MAMMAL	Frugivore.Granivore	Myoprocta	acouchy	Myoprocta_acouchy	1	undefined
TF-1-03	Terra_firme	2018	106	2018-06-30	2018-10-14	2018-07-04	07:37:01	MAMMAL	Frugivore.Granivore	Myoprocta	acouchy	Myoprocta_acouchy	1	undefined
TF-1-03	Terra_firme	2018	106	2018-06-30	2018-10-14	2018-10-01	22:11:03	MAMMAL	Insectivore.Omnivore	Dasypus	spp.	Dasypus_spp.	1	undefined
TF-1-03	Terra_firme	2018	106	2018-06-30	2018-10-14	2018-10-01	19:41:17	MAMMAL	Insectivore.Omnivore	Metachirus	nudicaudatus	Metachirus_nudicaudatus	1	undefined
TF-1-03	Terra_firme	2018	106	2018-06-30	2018-10-14	2018-07-15	15:40:18	MAMMAL	Frugivore.Granivore	Dasyprocta	leporina	Dasyprocta_leporina	1	undefined
TF-1-03	Terra_firme	2018	106	2018-06-30	2018-10-14	2018-07-15	18:16:07	MAMMAL	Frugivore.Granivore	Myoprocta	acouchy	Myoprocta_acouchy	1	undefined
TF-1-03	Terra_firme	2018	106	2018-06-30	2018-10-14	2018-07-15	01:50:17	MAMMAL	Insectivore.Omnivore	Philander	opossum	Philander_opossum	1	undefined
TF-2-03	Terra_firme	2019	62	2019-07-10	2019-09-10	2019-08-01	03:15:56	MAMMAL	Insectivore.Omnivore	Philander	opossum	Philander_opossum	1	undefined
TF-2-03	Terra_firme	2019	62	2019-07-10	2019-09-10	2019-08-01	22:19:02	MAMMAL	Insectivore.Omnivore	Philander	opossum	Philander_opossum	1	undefined
TF-2-03	Terra_firme	2019	62	2019-07-10	2019-09-10	2019-07-31	03:30:22	MAMMAL	Insectivore.Omnivore	Metachirus	nudicaudatus	Metachirus_nudicaudatus	1	undefined
TF-2-03	Terra_firme	2019	62	2019-07-10	2019-09-10	2019-08-29	06:03:15	MAMMAL	Frugivore.Granivore	Myoprocta	acouchy	Myoprocta_acouchy	1	undefined
TF-2-03	Terra_firme	2019	62	2019-07-10	2019-09-10	2019-08-02	01:55:27	MAMMAL	Insectivore.Omnivore	Philander	opossum	Philander_opossum	1	undefined
TF-2-03	Terra_firme	2019	62	2019-07-10	2019-09-10	2019-07-30	16:59:55	MAMMAL	Frugivore.Granivore	Dasyprocta	leporina	Dasyprocta_leporina	1	undefined
TF-2-03	Terra_firme	2019	62	2019-07-10	2019-09-10	2019-09-01	02:44:43	MAMMAL	Insectivore.Omnivore	Metachirus	nudicaudatus	Metachirus_nudicaudatus	1	undefined
TF-2-03	Terra_firme	2019	62	2019-07-10	2019-09-10	2019-08-28	03:28:16	MAMMAL	Frugivore.Omnivore	Didelphis	marsupialis	Didelphis_marsupialis	1	undefined
TF-2-03	Terra_firme	2019	62	2019-07-10	2019-09-10	2019-08-03	00:36:31	MAMMAL	Insectivore.Omnivore	Philander	opossum	Philander_opossum	1	undefined
TF-2-03	Terra_firme	2019	62	2019-07-10	2019-09-10	2019-08-03	05:30:12	MAMMAL	Frugivore.Granivore	Proechimys	spp.	Proechimys_spp.	1	undefined
TF-2-03	Terra_firme	2019	62	2019-07-10	2019-09-10	2019-07-29	16:55:46	MAMMAL	Frugivore.Granivore	Dasyprocta	leporina	Dasyprocta_leporina	1	undefined
TF-2-03	Terra_firme	2019	62	2019-07-10	2019-09-10	2019-08-27	18:51:23	MAMMAL	Frugivore.Granivore	Proechimys	spp.	Proechimys_spp.	1	undefined
TF-2-03	Terra_firme	2019	62	2019-07-10	2019-09-10	2019-08-04	04:05:53	MAMMAL	Frugivore.Herbivore	Cuniculus	paca	Cuniculus_paca	1	undefined
TF-2-03	Terra_firme	2019	62	2019-07-10	2019-09-10	2019-08-04	19:32:35	MAMMAL	Frugivore.Herbivore	Cuniculus	paca	Cuniculus_paca	1	undefined
TF-2-03	Terra_firme	2019	62	2019-07-10	2019-09-10	2019-07-28	02:03:29	MAMMAL	Frugivore.Granivore	Proechimys	spp.	Proechimys_spp.	1	undefined
TF-2-03	Terra_firme	2019	62	2019-07-10	2019-09-10	2019-09-03	02:36:55	MAMMAL	Insectivore.Omnivore	Metachirus	nudicaudatus	Metachirus_nudicaudatus	1	undefined
TF-2-03	Terra_firme	2019	62	2019-07-10	2019-09-10	2019-08-26	13:54:28	MAMMAL	Frugivore.Granivore	Dasyprocta	leporina	Dasyprocta_leporina	1	undefined
TF-2-03	Terra_firme	2019	62	2019-07-10	2019-09-10	2019-08-05	04:09:13	MAMMAL	Insectivore.Omnivore	Philander	opossum	Philander_opossum	1	undefined
TF-2-03	Terra_firme	2019	62	2019-07-10	2019-09-10	2019-08-05	19:14:19	MAMMAL	Insectivore.Omnivore	Philander	opossum	Philander_opossum	1	undefined
TF-2-03	Terra_firme	2019	62	2019-07-10	2019-09-10	2019-08-05	21:12:44	MAMMAL	Insectivore.Omnivore	Philander	opossum	Philander_opossum	1	undefined
TF-2-03	Terra_firme	2019	62	2019-07-10	2019-09-10	2019-07-27	17:55:46	MAMMAL	Frugivore.Granivore	Myoprocta	acouchy	Myoprocta_acouchy	1	undefined
TF-2-03	Terra_firme	2019	62	2019-07-10	2019-09-10	2019-09-04	17:49:48	MAMMAL	Frugivore.Granivore	Myoprocta	acouchy	Myoprocta_acouchy	1	undefined
TF-2-03	Terra_firme	2019	62	2019-07-10	2019-09-10	2019-08-06	06:50:03	MAMMAL	Frugivore.Granivore	Myoprocta	acouchy	Myoprocta_acouchy	1	undefined
TF-2-03	Terra_firme	2019	62	2019-07-10	2019-09-10	2019-07-26	06:13:45	MAMMAL	Frugivore.Granivore	Myoprocta	acouchy	Myoprocta_acouchy	1	undefined
TF-2-03	Terra_firme	2019	62	2019-07-10	2019-09-10	2019-08-24	00:55:29	MAMMAL	Insectivore.Omnivore	Metachirus	nudicaudatus	Metachirus_nudicaudatus	1	undefined
TF-2-03	Terra_firme	2019	62	2019-07-10	2019-09-10	2019-08-07	19:36:04	MAMMAL	Insectivore.Omnivore	Philander	opossum	Philander_opossum	1	undefined
TF-2-03	Terra_firme	2019	62	2019-07-10	2019-09-10	2019-09-06	04:41:30	MAMMAL	Insectivore.Omnivore	Metachirus	nudicaudatus	Metachirus_nudicaudatus	1	undefined
TF-2-03	Terra_firme	2019	62	2019-07-10	2019-09-10	2019-09-06	05:53:09	MAMMAL	Frugivore.Granivore	Myoprocta	acouchy	Myoprocta_acouchy	1	undefined
TF-2-03	Terra_firme	2019	62	2019-07-10	2019-09-10	2019-09-06	01:23:31	MAMMAL	Insectivore.Omnivore	Philander	opossum	Philander_opossum	1	undefined
TF-2-03	Terra_firme	2019	62	2019-07-10	2019-09-10	2019-09-06	05:38:01	MAMMAL	Frugivore.Granivore	Proechimys	spp.	Proechimys_spp.	1	undefined
TF-2-03	Terra_firme	2019	62	2019-07-10	2019-09-10	2019-08-23	04:24:49	MAMMAL	Frugivore.Granivore	Proechimys	spp.	Proechimys_spp.	1	undefined
TF-2-03	Terra_firme	2019	62	2019-07-10	2019-09-10	2019-08-08	07:03:07	MAMMAL	Frugivore.Granivore	Dasyprocta	leporina	Dasyprocta_leporina	1	undefined
TF-2-03	Terra_firme	2019	62	2019-07-10	2019-09-10	2019-08-08	23:32:15	MAMMAL	Insectivore.Omnivore	Metachirus	nudicaudatus	Metachirus_nudicaudatus	1	undefined
TF-2-03	Terra_firme	2019	62	2019-07-10	2019-09-10	2019-09-07	05:17:50	MAMMAL	Insectivore.Omnivore	Metachirus	nudicaudatus	Metachirus_nudicaudatus	1	undefined
TF-2-03	Terra_firme	2019	62	2019-07-10	2019-09-10	2019-07-10	11:36:59	INSTALL	Setup	Setup	Setup	Setup	1	undefined
TF-2-03	Terra_firme	2019	62	2019-07-10	2019-09-10	2019-08-22	17:51:58	MAMMAL	Frugivore.Granivore	Myoprocta	acouchy	Myoprocta_acouchy	1	undefined
TF-2-03	Terra_firme	2019	62	2019-07-10	2019-09-10	2019-08-22	19:09:16	MAMMAL	Frugivore.Granivore	Proechimys	spp.	Proechimys_spp.	1	undefined
TF-2-03	Terra_firme	2019	62	2019-07-10	2019-09-10	2019-08-09	19:07:30	MAMMAL	Frugivore.Herbivore	Cuniculus	paca	Cuniculus_paca	1	undefined
TF-2-03	Terra_firme	2019	62	2019-07-10	2019-09-10	2019-07-23	20:54:42	MAMMAL	Insectivore.Omnivore	Dasypus	spp.	Dasypus_spp.	1	undefined
TF-2-03	Terra_firme	2019	62	2019-07-10	2019-09-10	2019-09-08	07:14:26	MAMMAL	Frugivore.Granivore	Dasyprocta	leporina	Dasyprocta_leporina	1	undefined
TF-2-03	Terra_firme	2019	62	2019-07-10	2019-09-10	2019-09-08	18:13:40	MAMMAL	Frugivore.Granivore	Myoprocta	acouchy	Myoprocta_acouchy	1	undefined
TF-2-03	Terra_firme	2019	62	2019-07-10	2019-09-10	2019-07-11	17:51:00	MAMMAL	Frugivore.Granivore	Dasyprocta	leporina	Dasyprocta_leporina	1	undefined
TF-2-03	Terra_firme	2019	62	2019-07-10	2019-09-10	2019-08-21	20:27:15	MAMMAL	Frugivore.Herbivore	Cuniculus	paca	Cuniculus_paca	1	undefined
TF-2-03	Terra_firme	2019	62	2019-07-10	2019-09-10	2019-08-21	06:02:02	MAMMAL	Frugivore.Granivore	Myoprocta	acouchy	Myoprocta_acouchy	1	undefined
TF-2-03	Terra_firme	2019	62	2019-07-10	2019-09-10	2019-08-21	19:20:14	MAMMAL	Frugivore.Granivore	Proechimys	spp.	Proechimys_spp.	1	undefined
[truncated: 5,575 more rows]
