# Supplementary material for: Composition of terrestrial mammal assemblages and their habitat use in unflooded and flooded blackwater forests in the Central Amazon
Source: PeerJ. 2022 Dec 12;10:e14374. doi: 10.7717/peerj.14374 (PMC9753760; doi:10.7717/peerj.14374)
Supplement: Supplemental Information 10 — Abbreviations and description of the data fields [file peerj-10-14374-s010.xlsx]

## Sheet: MetadataCameraTrapRawData
Abreviation	Description
Station	Camera trap code; TF referesto terra firme and IGA refers to igapó forest
Florest_type	Habitat type that camera was deployed
Year	The sampling year
Effort	Number of days the camera has been working
Setup_date	The camera trap installation date
Retrieval_date	The camera trap pickup date
Date	Date the animal was recorded in front of the camera
Time	Time the animal was recorded in front of the camera
Class	If is a vertebrate records or the setup or retrieval day
Trophic_guild	Trophic guild the organism belong to
Genus	The genus of the organism
Species	The species of the organism
Genus_Species	Concatenated data to proceed with the analysis
Number_animals	Number of animals in front of the camera
Sex	The sex of the organism
